# Supplementary material for: Polysaccharide metabolic pattern of Cytophagales and Flavobacteriales: a comprehensive genomics approach
Source: Frontiers journal article supplement (doi:10.3389/fmars.2025.1551618), 2025-03-04
Supplement: Data_Sheet_2.xlsx [file Data_Sheet_2.xlsx]

## Sheet: Supplementary Table 1
Supplementary Table 1: Summary of genome characteristics, taxonomy, and accession information of 702 species.
BioProject	BioSample	Assembly_Accession	Organism_Scientific_Name	Species	Genus	Family	Order	Class	Phylum	Taxonomy id	Organism Qualifier	Completeness (%)	Contamination (%)	Strain heterogeneity (%)	GC	# predicted genes	Genome_Level	Contig N50 (bp)	Genome_Size (M)	16S rRNA	tRNA	Sources	Environment_Condition
PRJNA16082	SAMN02598357	GCA_000016645.1	Flavobacterium johnsoniae UW101	Flavobacterium johnsoniae	Flavobacterium	Flavobacteriaceae	Flavobacteriales	Flavobacteriia	Bacteroidota	376686	strain: UW101; ATCC 17061	99.65	0.14	0	0.341129	5199	Complete Genome	6096872	5.9	6	62	land	normal
PRJNA29403	SAMN00001911	GCA_000023285.1	Capnocytophaga ochracea DSM 7271	Capnocytophaga ochracea	Capnocytophaga	Flavobacteriaceae	Flavobacteriales	Flavobacteriia	Bacteroidota	521097	strain: DSM 7271	100	0	0	0.39588	2185	Complete Genome	2612925	2.6	4	47	land	normal
PRJNA38641	SAMN02603855	GCA_000023465.1	Zunongwangia profunda SM-A87	Zunongwangia profunda	Zunongwangia	Flavobacteriaceae	Flavobacteriales	Flavobacteriia	Bacteroidota	655815	strain: SMA-87	99.62	0.57	0	0.362185	4490	Complete Genome	5128187	5	3	49	marine	normal
PRJNA13461	SAMN02603916	GCA_000024125.1	Robiginitalea biformata HTCC2501	Robiginitalea biformata	Robiginitalea	Flavobacteriaceae	Flavobacteriales	Flavobacteriia	Bacteroidota	313596	strain: HTCC2501	99.01	0.11	0	0.552933	3117	Complete Genome	3530383	3.5	2	41	marine	extreme
PRJEA19061	SAMEA2272667	GCA_000060345.1	Gramella forsetii KT0803	Gramella forsetii	Gramella	Flavobacteriaceae	Flavobacteriales	Flavobacteriia	Bacteroidota	411154	strain: KT0803	99.62	0.19	0	0.366108	3448	Complete Genome	3798465	3.7	3	44	marine	normal
PRJNA13573	SAMN02436111	GCA_000152985.1	Leeuwenhoekiella blandensis MED217	Leeuwenhoekiella blandensis	Leeuwenhoekiella	Flavobacteriaceae	Flavobacteriales	Flavobacteriia	Bacteroidota	398720	strain: MED217	99.05	0	0	0.397579	3669	Scaffold	392634	4.1	4	38	tidal flat	normal
PRJNA13451	SAMN02436114	GCA_000153225.1	Polaribacter irgensii 23-P	Polaribacter irgensii	Polaribacter	Flavobacteriaceae	Flavobacteriales	Flavobacteriia	Bacteroidota	313594	strain: 23-P	99.33	0.34	0	0.345202	2425	Scaffold	927669	2.7	3	37	marine	extreme
PRJNA13542	SAMN02603919	GCA_000153485.2	Psychroflexus torquis ATCC 700755	Psychroflexus torquis	Psychroflexus	Flavobacteriaceae	Flavobacteriales	Flavobacteriia	Bacteroidota	313595	strain: ATCC 700755	98.73	2.28	44.44	0.345253	3746	Complete Genome	4321832	4.2	3	37	land	extreme
PRJNA19315	SAMN02436147	GCA_000154725.1	Kordia algicida OT-1	Kordia algicida	Kordia	Flavobacteriaceae	Flavobacteriales	Flavobacteriia	Bacteroidota	391587	strain: OT-1	99.48	0.61	0	0.342634	4421	Scaffold	361838	4.9	3	61	tidal flat	normal
PRJNA41529	SAMN00190054	GCA_000186265.1	Cellulophaga algicola DSM 14237	Cellulophaga algicola	Cellulophaga	Flavobacteriaceae	Flavobacteriales	Flavobacteriia	Bacteroidota	688270	strain: DSM 14237	99.67	0.71	0	0.337662	4280	Complete Genome	4888353	4.8	5	44	tidal flat	extreme
PRJNA50743	SAMN00713590	GCA_000190595.1	Cellulophaga lytica DSM 7489	Cellulophaga lytica	Cellulophaga	Flavobacteriaceae	Flavobacteriales	Flavobacteriia	Bacteroidota	867900	strain: DSM 7489	99.67	0	0	0.321109	3303	Complete Genome	3765936	3.7	4	40	marine	normal
PRJNA47603	SAMN00713599	GCA_000194605.1	Fluviicola taffensis DSM 16823	Fluviicola taffensis	Fluviicola	Crocinitomicaceae	Flavobacteriales	Flavobacteriia	Bacteroidota	755732	strain: DSM 16823	100	0	0	0.364947	4095	Complete Genome	4633577	4.5	2	42	land	normal
PRJNA13570	SAMN02603922	GCA_000196315.1	Croceibacter atlanticus HTCC2559	Croceibacter atlanticus	Croceibacter	Flavobacteriaceae	Flavobacteriales	Flavobacteriia	Bacteroidota	216432	strain: HTCC2559	99.62	0.19	0	0.339	2680	Complete Genome	2952962	2.9	2	36	marine	normal
PRJNA52467	SAMN02232041	GCA_000224085.1	Muricauda ruestringensis DSM 13258	Muricauda ruestringensis	Muricauda	Flavobacteriaceae	Flavobacteriales	Flavobacteriia	Bacteroidota	886377	strain: DSM 13258	99.34	0.83	33.33	0.41358	3478	Complete Genome	3842422	3.8	2	38	tidal flat	normal
PRJNA65297	SAMN02261417	GCA_000236705.1	Owenweeksia hongkongensis DSM 17368	Owenweeksia hongkongensis	Owenweeksia	Schleiferiaceae	Flavobacteriales	Flavobacteriia	Bacteroidota	926562	strain: DSM 17368	100	0	0	0.402335	3512	Complete Genome	4000057	3.9	2	37	tidal flat	normal
PRJNA50579	SAMN02261365	GCA_000243235.1	Gillisia limnaea DSM 15749	Gillisia limnaea	Gillisia	Flavobacteriaceae	Flavobacteriales	Flavobacteriia	Bacteroidota	865937	strain: DSM 15749	99.49	0	0	0.376146	3520	Scaffold	236824	3.9	2	43	marine	extreme
PRJNA67123	SAMEA3138411	GCA_000253275.1	Flavobacterium branchiophilum FL-15	Flavobacterium branchiophilum	Flavobacterium	Flavobacteriaceae	Flavobacteriales	Flavobacteriia	Bacteroidota	1034807	strain: FL-15	98.59	0.71	0	0.328583	3115	Complete Genome	3559884	3.5	3	44	land	normal
PRJNA73229	SAMN02470972	GCA_000255455.1	Aquimarina agarilytica ZC1	Aquimarina agarilytica	Aquimarina	Flavobacteriaceae	Flavobacteriales	Flavobacteriia	Bacteroidota	620914	strain: ZC1	98.67	0.4	0	0.328067	3551	Scaffold	58291	4.2	1	32	marine	normal
PRJNA65069	SAMN02261416	GCA_000260115.1	Joostella marina DSM 19592	Joostella marina	Joostella	Flavobacteriaceae	Flavobacteriales	Flavobacteriia	Bacteroidota	926559	strain: DSM 19592	99.67	0	0	0.335949	3936	Scaffold	1829066	4.4	3	48	marine	normal
PRJNA46631	SAMN02232006	GCA_000265385.1	Aequorivita sublithincola DSM 14238	Aequorivita sublithincola	Aequorivita	Flavobacteriaceae	Flavobacteriales	Flavobacteriia	Bacteroidota	746697	strain: DSM 14238	99.49	0.19	0	0.361913	3200	Complete Genome	3520671	3.4	2	37	land	extreme
PRJNA174178	SAMN02441030	GCA_000374405.1	Riemerella columbina DSM 16469	Riemerella columbina	Riemerella	Weeksellaceae	Flavobacteriales	Flavobacteriia	Bacteroidota	1123058	strain: DSM 16469	100	0	0	0.359965	2441	Scaffold	99022	2.4	3	38	land	normal
PRJNA182404	SAMN02441333	GCA_000378485.1	Flavobacterium rivuli WB 3.3-2 = DSM 21788	Flavobacterium rivuli	Flavobacterium	Flavobacteriaceae	Flavobacteriales	Flavobacteriia	Bacteroidota	1121895	strain: DSM 21788	99.46	0	0	0.396169	3995	Scaffold	439581	4.4	1	49	land	normal
PRJNA182437	SAMN02440477	GCA_000378765.1	Psychroflexus tropicus DSM 15496	Psychroflexus tropicus	Psychroflexus	Flavobacteriaceae	Flavobacteriales	Flavobacteriia	Bacteroidota	1123035	strain: DSM 15496	99.62	0	0	0.365493	2778	Scaffold	398616	3	1	33	land	extreme
PRJNA185587	SAMN02440497	GCA_000382125.1	Eudoraea adriatica DSM 19308	Eudoraea adriatica	Eudoraea	Flavobacteriaceae	Flavobacteriales	Flavobacteriia	Bacteroidota	1121875	strain: DSM 19308	99.28	1.11	0	0.382523	3500	Scaffold	562897	3.8	1	36	tidal flat	normal
PRJNA187932	SAMN02440982	GCA_000382425.1	Empedobacter brevis NBRC 14943 = ATCC 43319	Empedobacter brevis	Empedobacter	Weeksellaceae	Flavobacteriales	Flavobacteriia	Bacteroidota	1218108	strain: ATCC 43319	100	0	0	0.32744	3565	Scaffold	290273	3.7	0	57	land	normal
PRJNA188854	SAMN02440683	GCA_000422265.1	Kaistella palustris DSM 21579	Kaistella palustris	Kaistella	Weeksellaceae	Flavobacteriales	Flavobacteriia	Bacteroidota	1121288	strain: DSM 21579	100	0.49	0	0.414917	2677	Scaffold	327052	2.9	1	38	land	normal
PRJNA188867	SAMN02441142	GCA_000422365.1	Mesoflavibacter zeaxanthinifaciens DSM 18436	Mesoflavibacter zeaxanthinifaciens	Mesoflavibacter	Flavobacteriaceae	Flavobacteriales	Flavobacteriia	Bacteroidota	1122225	strain: DSM 18436	99.67	0	0	0.314104	2700	Scaffold	316549	2.9	2	38	tidal flat	normal
PRJNA185590	SAMN02441177	GCA_000422685.1	Flavobacterium gelidilacus DSM 15343	Flavobacterium gelidilacus	Flavobacterium	Flavobacteriaceae	Flavobacteriales	Flavobacteriia	Bacteroidota	1121891	strain: DSM 15343	99.65	0	0	0.300314	3134	Scaffold	408195	3.4	1	38	land	extreme
PRJNA185591	SAMN02441178	GCA_000422705.1	Flavobacterium soli DSM 19725	Flavobacterium soli	Flavobacterium	Flavobacteriaceae	Flavobacteriales	Flavobacteriia	Bacteroidota	1121897	strain: DSM 19725	99.65	0.35	0	0.36089	3481	Scaffold	400553	3.9	1	41	land	normal
PRJNA185592	SAMN02441179	GCA_000422725.1	Flavobacterium subsaxonicum WB 4.1-42 = DSM 21790	Flavobacterium subsaxonicum	Flavobacterium	Flavobacteriaceae	Flavobacteriales	Flavobacteriia	Bacteroidota	1121898	strain: DSM 21790	99.65	0	0	0.416153	4069	Scaffold	303151	4.5	1	41	land	normal
PRJNA185617	SAMN02440834	GCA_000423005.1	Gelidibacter mesophilus DSM 14095	Gelidibacter mesophilus	Gelidibacter	Flavobacteriaceae	Flavobacteriales	Flavobacteriia	Bacteroidota	1121912	strain: DSM 14095	99.67	0.99	0	0.36852	3892	Scaffold	331742	4.3	1	36	tidal flat	normal
PRJNA185621	SAMN02441167	GCA_000423045.1	Gramella portivictoriae DSM 23547	Gramella portivictoriae	Gramella	Flavobacteriaceae	Flavobacteriales	Flavobacteriia	Bacteroidota	1121932	strain: DSM 23547	99.6	0.19	0	0.395895	2987	Scaffold	892434	3.2	1	41	tidal flat	normal
PRJNA185622	SAMN02441504	GCA_000423065.1	Gramella echinicola DSM 19838	Gramella echinicola	Gramella	Flavobacteriaceae	Flavobacteriales	Flavobacteriia	Bacteroidota	1121931	strain: DSM 19838	99.62	0	0	0.369106	3189	Scaffold	927778	3.4	1	40	marine	normal
PRJNA185656	SAMN02440840	GCA_000423585.1	Salinimicrobium xinjiangense DSM 19287	Salinimicrobium xinjiangense	Salinimicrobium	Flavobacteriaceae	Flavobacteriales	Flavobacteriia	Bacteroidota	1123235	strain: DSM 19287	99.62	0	0	0.412725	3374	Scaffold	119647	3.7	1	40	land	extreme
PRJNA187101	SAMN02440676	GCA_000424665.1	Salinimicrobium terrae DSM 17865	Salinimicrobium terrae	Salinimicrobium	Flavobacteriaceae	Flavobacteriales	Flavobacteriia	Bacteroidota	1123234	strain: DSM 17865	99.62	0	0	0.403558	3188	Scaffold	305362	3.5	1	40	land	extreme
PRJNA188327	SAMN02440812	GCA_000424985.1	Arenibacter latericius DSM 15913	Arenibacter latericius	Arenibacter	Flavobacteriaceae	Flavobacteriales	Flavobacteriia	Bacteroidota	1121012	strain: DSM 15913	99.67	0.17	0	0.36807	3781	Scaffold	82488	4.4	1	37	marine	normal
PRJNA188886	SAMN02440859	GCA_000425305.1	Psychroserpens burtonensis DSM 12212	Psychroserpens burtonensis	Psychroserpens	Flavobacteriaceae	Flavobacteriales	Flavobacteriia	Bacteroidota	1123037	strain: DSM 12212	99.67	1.87	0	0.334107	3613	Scaffold	163996	3.9	1	35	land	extreme
PRJNA188892	SAMN02440860	GCA_000425425.1	Flavobacterium daejeonense DSM 17708	Flavobacterium daejeonense	Flavobacterium	Flavobacteriaceae	Flavobacteriales	Flavobacteriia	Bacteroidota	1121887	strain: DSM 17708	99.65	0.31	0	0.346546	3621	Scaffold	138452	4.2	1	50	land	normal
PRJNA188893	SAMN02441540	GCA_000425445.1	Flavobacterium denitrificans DSM 15936	Flavobacterium denitrificans	Flavobacterium	Flavobacteriaceae	Flavobacteriales	Flavobacteriia	Bacteroidota	1121888	strain: DSM 15936	99.65	0.05	0	0.340386	4121	Scaffold	356857	4.7	1	50	land	normal
PRJNA188894	SAMN02440630	GCA_000425465.1	Flavobacterium filum DSM 17961	Flavobacterium filum	Flavobacterium	Flavobacteriaceae	Flavobacteriales	Flavobacteriia	Bacteroidota	1121889	strain: DSM 17961	99.29	0	0	0.338226	2860	Scaffold	145550	3.1	1	41	land	normal
PRJNA188895	SAMN02440861	GCA_000425485.1	Flavobacterium tegetincola DSM 22377	Flavobacterium tegetincola	Flavobacterium	Flavobacteriaceae	Flavobacteriales	Flavobacteriia	Bacteroidota	1121901	strain: DSM 22377	99.65	0.09	0	0.349769	3423	Scaffold	156379	3.7	1	41	marine	extreme
PRJNA188896	SAMN02440631	GCA_000425505.1	Flavobacterium frigidarium DSM 17623	Flavobacterium frigidarium	Flavobacterium	Flavobacteriaceae	Flavobacteriales	Flavobacteriia	Bacteroidota	1121890	strain: DSM 17623	98.59	0	0	0.340689	3159	Scaffold	250098	3.5	0	46	marine	extreme
PRJNA188904	SAMN02441528	GCA_000425645.1	Gaetbulibacter saemankumensis DSM 17032	Gaetbulibacter saemankumensis	Gaetbulibacter	Flavobacteriaceae	Flavobacteriales	Flavobacteriia	Bacteroidota	1121909	strain: DSM 17032	99.5	0	0	0.343151	2676	Scaffold	510693	3	1	39	tidal flat	normal
PRJNA195786	SAMN02441523	GCA_000426465.1	Epilithonimonas caeni DSM 17710	Epilithonimonas caeni	Epilithonimonas	Weeksellaceae	Flavobacteriales	Flavobacteriia	Bacteroidota	1121285	strain: DSM 17710	99.51	0	0	0.366048	3754	Scaffold	317605	4	1	45	land	extreme
PRJNA182403	SAMN02440607	GCA_000428485.1	Epilithonimonas tenax DSM 16811	Epilithonimonas tenax	Epilithonimonas	Weeksellaceae	Flavobacteriales	Flavobacteriia	Bacteroidota	1121870	strain: DSM 16811	100	0	0	0.375591	3467	Scaffold	83168	3.6	1	38	land	normal
PRJNA185523	SAMN02440880	GCA_000429125.1	Aequorivita capsosiphonis DSM 23843	Aequorivita capsosiphonis	Aequorivita	Flavobacteriaceae	Flavobacteriales	Flavobacteriia	Bacteroidota	1120951	strain: DSM 23843	99.62	0	0	0.368783	3641	Scaffold	263608	4	2	38	marine	normal
PRJNA185549	SAMN02440866	GCA_000429545.1	Arenibacter certesii DSM 19833	Arenibacter certesii	Arenibacter	Flavobacteriaceae	Flavobacteriales	Flavobacteriia	Bacteroidota	1121011	strain: DSM 19833	99.67	0.5	0	0.376695	4173	Scaffold	123453	4.9	1	36	marine	normal
PRJNA185581	SAMN02440857	GCA_000430025.1	Flavobacterium suncheonense GH29-5 = DSM 17707	Flavobacterium suncheonense	Flavobacterium	Flavobacteriaceae	Flavobacteriales	Flavobacteriia	Bacteroidota	1121899	strain: DSM 17707	99.65	0	0	0.405423	2746	Scaffold	233971	2.8	1	42	land	normal
PRJNA188811	SAMN02441146	GCA_000430545.1	Tenacibaculum ovolyticum DSM 18103	Tenacibaculum ovolyticum	Tenacibaculum	Flavobacteriaceae	Flavobacteriales	Flavobacteriia	Bacteroidota	1123347	strain: DSM 18103	99.33	0	0	0.295482	3690	Scaffold	242227	4	1	46	land	normal
PRJNA188819	SAMN02440808	GCA_000430645.1	Aquimarina latercula DSM 2041	Aquimarina latercula	Aquimarina	Flavobacteriaceae	Flavobacteriales	Flavobacteriia	Bacteroidota	1121006	strain: DSM 2041	99.62	0.19	0	0.322215	5546	Scaffold	430189	6.1	1	53	tidal flat	normal
PRJNA188852	SAMN02441479	GCA_000430825.1	Chryseobacterium daeguense DSM 19388	Chryseobacterium daeguense	Chryseobacterium	Weeksellaceae	Flavobacteriales	Flavobacteriia	Bacteroidota	1121286	strain: DSM 19388	100	0	0	0.361359	4017	Scaffold	367059	4.1	1	56	land	normal
PRJNA188853	SAMN02440691	GCA_000430845.1	Chryseobacterium gregarium DSM 19109	Chryseobacterium gregarium	Chryseobacterium	Weeksellaceae	Flavobacteriales	Flavobacteriia	Bacteroidota	1121287	strain: DSM 19109	100	0	0	0.393107	4058	Scaffold	210690	4.3	1	53	land	normal
PRJNA73387	SAMEA3138809	GCA_000455605.1	Flavobacterium indicum GPTSA100-9 = DSM 17447	Flavobacterium indicum	Flavobacterium	Flavobacteriaceae	Flavobacteriales	Flavobacteriia	Bacteroidota	1094466	strain: GPTSA100-9	99.29	0.07	0	0.313836	2738	Complete Genome	2993089	2.9	4	60	land	normal
PRJNA209292	SAMN02208949	GCA_000468615.2	Cellulophaga baltica 18	Cellulophaga baltica	Cellulophaga	Flavobacteriaceae	Flavobacteriales	Flavobacteriia	Bacteroidota	1348584	strain: 18	99.67	0.71	0	0.34681	3971	Complete Genome	4635105	4.5	4	42	marine	normal
PRJNA210210	SAMN02584980	GCA_000518485.1	Olleya marilimosa CAM030	Olleya marilimosa	Olleya	Flavobacteriaceae	Flavobacteriales	Flavobacteriia	Bacteroidota	1353276	strain: CAM030	99.67	0.17	0	0.318024	3051	Scaffold	310554	3.3	1	36	marine	normal
PRJNA221031	SAMN02743978	GCA_000621125.1	Maribacter antarcticus DSM 21422	Maribacter antarcticus	Maribacter	Flavobacteriaceae	Flavobacteriales	Flavobacteriia	Bacteroidota	1122191	strain: DSM 21422	99.67	0.11	0	0.374263	4305	Scaffold	339358	4.7	2	39	marine	extreme
PRJNA223059	SAMN02744008	GCA_000621625.1	Crocinitomix catalasitica ATCC 23190	Crocinitomix catalasitica	Crocinitomix	Crocinitomicaceae	Flavobacteriales	Flavobacteriia	Bacteroidota	1408433	strain: ATCC 23190	100	0.54	0	0.340811	4082	Scaffold	128440	4.5	1	42	tidal flat	normal
PRJNA234968	SAMN02743358	GCA_000686885.1	Flavobacterium sasangense DSM 21067	Flavobacterium sasangense	Flavobacterium	Flavobacteriaceae	Flavobacteriales	Flavobacteriia	Bacteroidota	1121896	strain: DSM 21067	99.65	0.35	100	0.323171	2985	Scaffold	126873	3.1	0	42	land	normal
PRJEB3965	SAMEA3139019	GCA_000723205.1	Formosa agariphila KMM 3901	Formosa agariphila	Formosa	Flavobacteriaceae	Flavobacteriales	Flavobacteriia	Bacteroidota	1347342	strain: type strain: KMM 3901	99.01	0.71	0	0.334631	3589	Chromosome	2537601	4.1	4	45	marine	normal
PRJNA258116	SAMN02988278	GCA_000746845.1	Altibacter lentus	Altibacter lentus	Altibacter	Flavobacteriaceae	Flavobacteriales	Flavobacteriia	Bacteroidota	1223410	strain: JLT2010	98.86	0.19	0	0.421268	2953	Scaffold	1823738	3.1	1	35	marine	normal
PRJNA219465	SAMN02358229	GCA_000756505.1	Ornithobacterium rhinotracheale ORT-UMN 88	Ornithobacterium rhinotracheale	Ornithobacterium	Weeksellaceae	Flavobacteriales	Flavobacteriia	Bacteroidota	1401325	strain: ORT-UMN 88	100	0	0	0.374553	2312	Complete Genome	2397867	2.4	3	43	land	normal
PRJNA213665	SAMN03252360	GCA_000789235.1	Wocania ichthyoenteri Th78	Wocania ichthyoenteri	Wocania	Flavobacteriaceae	Flavobacteriales	Flavobacteriia	Bacteroidota	1380600	strain: Th78	99.67	1.65	0	0.320618	3434	Scaffold	878943	3.9	2	41	land	normal
PRJDB1596	SAMD00061027	GCA_000831385.1	Nonlabens marinus S1-08	Nonlabens marinus	Nonlabens	Flavobacteriaceae	Flavobacteriales	Flavobacteriia	Bacteroidota	1454201	strain: S1-08	97.78	0	0	0.396595	2683	Chromosome	1469904	2.9	2	36	marine	normal
PRJNA272451	SAMN03282272	GCA_000833025.1	Myroides profundi	Myroides profundi	Myroides	Flavobacteriaceae	Flavobacteriales	Flavobacteriia	Bacteroidota	480520	strain: D25	99.65	0.29	0	0.338458	3580	Complete Genome	4064534	4	5	104	marine	normal
PRJNA236449	SAMN03379851	GCA_000941055.1	Siansivirga zeaxanthinifaciens CC-SAMT-1	Siansivirga zeaxanthinifaciens	Siansivirga	Flavobacteriaceae	Flavobacteriales	Flavobacteriia	Bacteroidota	1454006	strain: CC-SAMT-1	99.67	1.15	0	0.335339	2869	Complete Genome	3303986	3.2	3	43	tidal flat	normal
PRJNA276921	SAMN03382536	GCA_000963865.1	Muricauda lutaonensis	Muricauda lutaonensis	Muricauda	Flavobacteriaceae	Flavobacteriales	Flavobacteriia	Bacteroidota	516051	strain: CC-HSB-11	99.01	0.47	0	0.449687	3058	Complete Genome	3274259	3.2	2	40	tidal flat	normal
PRJEB8976	SAMEA3315864	GCA_000973105.1	Zobellia galactanivorans	Zobellia galactanivorans	Zobellia	Flavobacteriaceae	Flavobacteriales	Flavobacteriia	Bacteroidota	63186	strain: DsiJT	99.67	1.04	0	0.427796	4550	Complete Genome	5521712	5.4	2	39	tidal flat	normal
PRJNA283478	SAMN03651237	GCA_001020565.1	Maribacter thermophilus	Maribacter thermophilus	Maribacter	Flavobacteriaceae	Flavobacteriales	Flavobacteriia	Bacteroidota	1197874	strain: HT7-2	99.67	0.05	0	0.389346	3535	Scaffold	1358364	4	2	40	tidal flat	normal
PRJNA294108	SAMN04015015	GCA_001278115.1	Flavobacterium akiainvivens	Flavobacterium akiainvivens	Flavobacterium	Flavobacteriaceae	Flavobacteriales	Flavobacteriia	Bacteroidota	1202724	strain: IK-1	99.65	0	0	0.438057	4072	Scaffold	512188	4.4	3	50	land	normal
PRJNA298144	SAMN04156175	GCA_001310225.1	Algibacter alginicilyticus	Algibacter alginicilyticus	Algibacter	Flavobacteriaceae	Flavobacteriales	Flavobacteriia	Bacteroidota	1736674	strain: HZ22	98.68	0.53	0	0.318012	3342	Complete Genome	3994770	3.9	2	40	marine	normal
PRJNA213436	SAMN04202543	GCA_001401755.1	Aquimarina longa SW024	Aquimarina longa	Aquimarina	Flavobacteriaceae	Flavobacteriales	Flavobacteriia	Bacteroidota	1379258	strain: SW024	99.62	0.19	0	0.314519	4850	Scaffold	288357	5.4	1	40	marine	normal
PRJNA308000	SAMN04386100	GCA_001534645.1	Flavobacterium covae	Flavobacterium covae	Flavobacterium	Flavobacteriaceae	Flavobacteriales	Flavobacteriia	Bacteroidota	2906076	strain: 94-081	99.65	0.18	0	0.308025	2851	Complete Genome	3321600	3.3	4	74	land	normal
PRJNA304382	SAMN04299808	GCA_001543325.1	Lutibacter profundi	Lutibacter profundi	Lutibacter	Flavobacteriaceae	Flavobacteriales	Flavobacteriia	Bacteroidota	1622118	strain: LP1	97.38	0.4	0	0.297704	2642	Complete Genome	2966978	2.9	2	40	marine	extreme
PRJNA313490	SAMN04524003	GCA_001648155.1	Chryseobacterium glaciei	Chryseobacterium glaciei	Chryseobacterium	Weeksellaceae	Flavobacteriales	Flavobacteriia	Bacteroidota	1685010	strain: IHBB 10212	100	0	0	0.340815	4372	Complete Genome	4843645	4.8	7	80	land	extreme
PRJNA191952	SAMN04572126	GCA_001653755.1	Dokdonia donghaensis DSW-1	Dokdonia donghaensis	Dokdonia	Flavobacteriaceae	Flavobacteriales	Flavobacteriia	Bacteroidota	1300343	strain: DSW-1	99.62	0.51	83.33	0.381717	2886	Complete Genome	3293944	3.2	3	45	marine	normal
PRJNA309604	SAMN04451729	GCA_001697185.1	Wenyingzhuangia fucanilytica	Wenyingzhuangia fucanilytica	Wenyingzhuangia	Flavobacteriaceae	Flavobacteriales	Flavobacteriia	Bacteroidota	1790137	strain: CZ1127	96.85	0.67	0	0.316354	2806	Complete Genome	3427057	3.4	4	52	tidal flat	normal
PRJNA329021	SAMN05389975	GCA_001705175.1	Flavobacterium anhuiense	Flavobacterium anhuiense	Flavobacterium	Flavobacteriaceae	Flavobacteriales	Flavobacteriia	Bacteroidota	459526	strain: GSE09	99.56	0.19	0	0.343219	4287	Complete Genome	5109718	5	5	64	land	normal
PRJNA342520	SAMN05762002	GCA_001752425.1	Salegentibacter salarius	Salegentibacter salarius	Salegentibacter	Flavobacteriaceae	Flavobacteriales	Flavobacteriia	Bacteroidota	435906	strain: KCTC 12974	99.43	0.76	0	0.370116	3025	Scaffold	89596	3.3	1	40	tidal flat	extreme
PRJNA341557	SAMN05726020	GCA_001761325.1	Urechidicola croceus	Urechidicola croceus	Urechidicola	Flavobacteriaceae	Flavobacteriales	Flavobacteriia	Bacteroidota	1850246	strain: LPB0138	98.99	0	0	0.303527	3031	Complete Genome	3426122	3.4	2	40	land	normal
PRJNA341555	SAMN05726018	GCA_001761365.1	Polaribacter vadi	Polaribacter vadi	Polaribacter	Flavobacteriaceae	Flavobacteriales	Flavobacteriia	Bacteroidota	1774273	strain: LPB0003	99.66	0.42	0	0.296381	3296	Complete Genome	3809314	3.7	3	41	land	normal
PRJNA341566	SAMN05726037	GCA_001761465.1	Flavobacterium gilvum	Flavobacterium gilvum	Flavobacterium	Flavobacteriaceae	Flavobacteriales	Flavobacteriia	Bacteroidota	1492737	strain: EM1308	98.94	0.68	0	0.351662	3553	Complete Genome	4402594	4.3	5	56	land	normal
PRJNA340213	SAMN05695074	GCA_001831475.1	Flavobacterium crassostreae	Flavobacterium crassostreae	Flavobacterium	Flavobacteriaceae	Flavobacteriales	Flavobacteriia	Bacteroidota	1763534	strain: LPB0076	99.65	0.88	0	0.359812	2663	Complete Genome	3027315	3	7	61	land	normal
PRJNA343870	SAMN05804760	GCA_001857965.1	Flavobacterium commune	Flavobacterium commune	Flavobacterium	Flavobacteriaceae	Flavobacteriales	Flavobacteriia	Bacteroidota	1306519	strain: PK15	99.65	0.43	0	0.343765	3190	Complete Genome	3851214	3.8	5	56	land	normal
PRJNA350755	SAMN05945920	GCA_001889005.1	Gramella salexigens	Gramella salexigens	Gramella	Flavobacteriaceae	Flavobacteriales	Flavobacteriia	Bacteroidota	1913577	strain: LPB0144	99.62	0.76	100	0.381595	2649	Complete Genome	2978889	2.9	3	45	marine	normal
PRJNA350758	SAMN05945923	GCA_001889045.1	Tenacibaculum todarodis	Tenacibaculum todarodis	Tenacibaculum	Flavobacteriaceae	Flavobacteriales	Flavobacteriia	Bacteroidota	1850252	strain: LPB0136	99.66	1.17	50	0.307272	2714	Complete Genome	3019213	3	3	40	land	normal
PRJNA357344	SAMN04633439	GCA_001913155.1	Maribacter hydrothermalis	Maribacter hydrothermalis	Maribacter	Flavobacteriaceae	Flavobacteriales	Flavobacteriia	Bacteroidota	1836467	strain: T28	99.01	0.66	0	0.343902	3711	Complete Genome	4271158	4.2	3	42	marine	extreme
PRJNA325700	SAMN05231554	GCA_001951155.1	Gramella flava JLT2011	Gramella flava	Gramella	Flavobacteriaceae	Flavobacteriales	Flavobacteriia	Bacteroidota	1229726	strain: JLT2011	99.49	0	0	0.421446	3562	Complete Genome	4007868	3.9	3	44	marine	normal
PRJNA361535	SAMN06234633	GCA_001971745.1	Lacinutrix venerupis	Lacinutrix venerupis	Lacinutrix	Flavobacteriaceae	Flavobacteriales	Flavobacteriia	Bacteroidota	1486034	strain: DOK2-8	99.67	0	0	0.305506	2827	Complete Genome	3192399	3.1	2	37	land	normal
PRJNA362672	SAMN06240835	GCA_001975665.1	Polaribacter reichenbachii	Polaribacter reichenbachii	Polaribacter	Flavobacteriaceae	Flavobacteriales	Flavobacteriia	Bacteroidota	996801	strain: 6Alg 8T	98.99	0	0	0.29507	3491	Complete Genome	4125014	4	3	41	tidal flat	normal
PRJNA326741	SAMN05281842	GCA_002022145.1	Elizabethkingia meningoseptica	Elizabethkingia meningoseptica	Elizabethkingia	Weeksellaceae	Flavobacteriales	Flavobacteriia	Bacteroidota	238	strain: G4120	100	0	0	0.363853	3621	Complete Genome	4004759	3.9	4	51	land	normal
PRJNA301708	SAMN02470677	GCA_002023665.2	Elizabethkingia anophelis R26	Elizabethkingia anophelis	Elizabethkingia	Weeksellaceae	Flavobacteriales	Flavobacteriia	Bacteroidota	1246994	strain: R26	100	0	0	0.354649	3749	Complete Genome	4058311	4	5	53	land	normal
PRJNA355348	SAMN06075339	GCA_002117085.1	Nonlabens tegetincola	Nonlabens tegetincola	Nonlabens	Flavobacteriaceae	Flavobacteriales	Flavobacteriia	Bacteroidota	323273	strain: NBRC 100970	99.35	0.09	0	0.354566	2600	Complete Genome	2835711	2.8	3	36	tidal flat	normal
PRJNA355354	SAMN06075354	GCA_002117125.1	Nonlabens spongiae	Nonlabens spongiae	Nonlabens	Flavobacteriaceae	Flavobacteriales	Flavobacteriia	Bacteroidota	331648	strain: JCM 13191	98.49	0	0	0.403849	3146	Chromosome	3379276	3.3	2	37	land	normal
PRJNA386407	SAMN06947001	GCA_002198115.1	Robiginitalea sediminis	Robiginitalea sediminis	Robiginitalea	Flavobacteriaceae	Flavobacteriales	Flavobacteriia	Bacteroidota	1982593	strain: O458	99.01	0.77	0	0.549752	2950	Scaffold	322287	3.2	1	38	tidal flat	normal
PRJNA386716	SAMN07125685	GCA_002209445.1	Capnocytophaga endodontalis	Capnocytophaga endodontalis	Capnocytophaga	Flavobacteriaceae	Flavobacteriales	Flavobacteriia	Bacteroidota	2708117	strain: ChDC OS43	100	0.48	0	0.38245	3115	Complete Genome	3412686	3.3	4	47	land	normal
PRJNA354433	SAMN06049052	GCA_002217195.1	Flavobacterium aquidurense	Flavobacterium aquidurense	Flavobacterium	Flavobacteriaceae	Flavobacteriales	Flavobacteriia	Bacteroidota	362413	strain: DSM 18293	99.65	0.17	0	0.346966	4955	Scaffold	121081	5.6	1	53	land	normal
PRJNA354433	SAMN06049050	GCA_002217275.1	Flavobacterium frigidimaris	Flavobacterium frigidimaris	Flavobacterium	Flavobacteriaceae	Flavobacteriales	Flavobacteriia	Bacteroidota	262320	strain: DSM 15937	99.65	0.59	0	0.339546	4579	Scaffold	142966	5.3	1	54	marine	extreme
PRJNA354433	SAMN06049051	GCA_002217285.1	Flavobacterium hercynium	Flavobacterium hercynium	Flavobacterium	Flavobacteriaceae	Flavobacteriales	Flavobacteriia	Bacteroidota	387094	strain: DSM 18292	99.65	0.55	33.33	0.337788	4521	Scaffold	112545	5.1	1	53	land	normal
PRJNA354433	SAMN06049047	GCA_002217335.1	Flavobacterium hydatis	Flavobacterium hydatis	Flavobacterium	Flavobacteriaceae	Flavobacteriales	Flavobacteriia	Bacteroidota	991	strain: ATCC 29551	99.65	1.62	0	0.326878	5048	Scaffold	222010	5.8	1	70	land	normal
PRJNA354433	SAMN06049060	GCA_002217355.1	Flavobacterium oncorhynchi	Flavobacterium oncorhynchi	Flavobacterium	Flavobacteriaceae	Flavobacteriales	Flavobacteriia	Bacteroidota	728056	strain: CCUG 59446	99.65	0.4	0	0.332809	4036	Scaffold	163250	4.6	1	52	land	normal
PRJNA354433	SAMN06049068	GCA_002217395.1	Flavobacterium plurextorum	Flavobacterium plurextorum	Flavobacterium	Flavobacteriaceae	Flavobacteriales	Flavobacteriia	Bacteroidota	1114867	strain: CCUG 60112	99.65	0.93	25	0.331213	4254	Scaffold	108575	4.9	1	51	tidal flat	normal
PRJNA380207	SAMN07322679	GCA_002234495.1	Arenibacter algicola	Arenibacter algicola	Arenibacter	Flavobacteriaceae	Flavobacteriales	Flavobacteriia	Bacteroidota	616991	strain: SMS7	99.67	1.08	0	0.398059	4997	Complete Genome	5793053	5.7	3	42	marine	normal
PRJNA396029	SAMN07419339	GCA_002251775.1	Flavobacterium aurantiibacter	Flavobacterium aurantiibacter	Flavobacterium	Flavobacteriaceae	Flavobacteriales	Flavobacteriia	Bacteroidota	2023067	strain: TH167	98.65	1.66	62.5	0.403664	2981	Scaffold	32579	3.2	1	38	land	normal
PRJNA395959	SAMN07418557	GCA_002251835.1	Flavobacterium cyanobacteriorum	Flavobacterium cyanobacteriorum	Flavobacterium	Flavobacteriaceae	Flavobacteriales	Flavobacteriia	Bacteroidota	2022802	strain: TH021	98.94	0.18	0	0.417027	3132	Scaffold	23498	3.2	1	33	land	normal
PRJNA398646	SAMN07514628	GCA_002269385.1	Maribacter cobaltidurans	Maribacter cobaltidurans	Maribacter	Flavobacteriaceae	Flavobacteriales	Flavobacteriia	Bacteroidota	1178778	strain: B1	99.34	0.82	0	0.397295	4188	Complete Genome	4639957	4.5	2	40	marine	normal
PRJNA342323	SAMN07488153	GCA_002285635.2	Chryseobacterium piperi	Chryseobacterium piperi	Chryseobacterium	Weeksellaceae	Flavobacteriales	Flavobacteriia	Bacteroidota	558152	strain: ATCC BAA-1782	100	0	0	0.352777	3964	Complete Genome	4501946	4.4	5	65	land	normal
PRJNA369395	SAMN06289147	GCA_002302415.1	Capnocytophaga gingivalis	Capnocytophaga gingivalis	Capnocytophaga	Flavobacteriaceae	Flavobacteriales	Flavobacteriia	Bacteroidota	1017	strain: H1496	100	0	0	0.400879	2708	Complete Genome	2838633	2.8	3	51	land	normal
PRJNA369395	SAMN06754876	GCA_002302475.1	Capnocytophaga cynodegmi	Capnocytophaga cynodegmi	Capnocytophaga	Flavobacteriaceae	Flavobacteriales	Flavobacteriia	Bacteroidota	28189	strain: G7591	100	0	0	0.342557	2294	Complete Genome	2640475	2.6	3	45	land	normal
PRJNA369395	SAMN06754875	GCA_002302495.1	Capnocytophaga sputigena	Capnocytophaga sputigena	Capnocytophaga	Flavobacteriaceae	Flavobacteriales	Flavobacteriia	Bacteroidota	1019	strain: D1179	99.52	0	0	0.387771	2528	Complete Genome	2855148	2.8	4	46	land	normal
PRJNA369395	SAMN06289152	GCA_002302565.1	Capnocytophaga canimorsus	Capnocytophaga canimorsus	Capnocytophaga	Flavobacteriaceae	Flavobacteriales	Flavobacteriia	Bacteroidota	28188	strain: 7120	100	0	0	0.362931	2104	Complete Genome	2414275	2.4	3	44	land	normal
PRJNA369395	SAMN06289146	GCA_002302635.1	Capnocytophaga stomatis	Capnocytophaga stomatis	Capnocytophaga	Flavobacteriaceae	Flavobacteriales	Flavobacteriia	Bacteroidota	1848904	strain: H2177	100	0	0	0.358685	2472	Complete Genome	2831350	2.8	3	45	land	normal
PRJNA381849	SAMN06689941	GCA_002514735.1	Sediminicola luteus	Sediminicola luteus	Sediminicola	Flavobacteriaceae	Flavobacteriales	Flavobacteriia	Bacteroidota	319238	strain: HQA918	99.34	0.4	0	0.440869	3820	Scaffold	577304	4.5	1	39	tidal flat	normal
PRJNA398706	SAMN07515617	GCA_002744755.1	Leeuwenhoekiella nanhaiensis	Leeuwenhoekiella nanhaiensis	Leeuwenhoekiella	Flavobacteriaceae	Flavobacteriales	Flavobacteriia	Bacteroidota	1655491	strain: G18	99.62	0.38	0	0.421011	3809	Scaffold	262916	4.3	1	35	marine	normal
PRJNA393580	SAMN07337715	GCA_002770595.1	Chryseobacterium camelliae	Chryseobacterium camelliae	Chryseobacterium	Weeksellaceae	Flavobacteriales	Flavobacteriia	Bacteroidota	1265445	strain: Dolsongi-HT1	100	0	0	0.418148	4014	Complete Genome	4376354	4.3	4	62	land	normal
PRJNA357141	SAMN06133458	GCA_002814075.1	Polaribacter sejongensis	Polaribacter sejongensis	Polaribacter	Flavobacteriaceae	Flavobacteriales	Flavobacteriia	Bacteroidota	985043	strain: KCTC 23670	99.33	1.06	0	0.305383	3642	Chromosome	106489	4.4	0	40	land	extreme
PRJNA415329	SAMN07821518	GCA_002843175.1	Confluentibacter flavum	Confluentibacter flavum	Confluentibacter	Flavobacteriaceae	Flavobacteriales	Flavobacteriia	Bacteroidota	1909700	strain: 3B	98.68	2.78	15	0.34228	3613	Scaffold	151417	4	1	39	land	extreme
PRJNA428941	SAMN08325534	GCA_002886045.1	Flavivirga eckloniae	Flavivirga eckloniae	Flavivirga	Flavobacteriaceae	Flavobacteriales	Flavobacteriia	Bacteroidota	1803846	strain: ECD14	99.34	2.49	0	0.339349	4653	Complete Genome	5665358	5.5	2	42	marine	normal
PRJNA428574	SAMN08295148	GCA_002893765.1	Tamlana carrageenivorans	Tamlana carrageenivorans	Tamlana	Flavobacteriaceae	Flavobacteriales	Flavobacteriia	Bacteroidota	2069432	strain: UJ94	98.68	1.45	12.5	0.35247	3652	Complete Genome	4116543	4	3	44	marine	normal
PRJNA429974	SAMN08324226	GCA_002899825.2	Chryseobacterium phosphatilyticum	Chryseobacterium phosphatilyticum	Chryseobacterium	Weeksellaceae	Flavobacteriales	Flavobacteriia	Bacteroidota	475075	strain: ISE14	100	0.74	0	0.363045	4732	Scaffold	583826	5.1	10	78	land	normal
PRJNA429989	SAMN08324236	GCA_002899895.2	Chryseobacterium oncorhynchi	Chryseobacterium oncorhynchi	Chryseobacterium	Weeksellaceae	Flavobacteriales	Flavobacteriia	Bacteroidota	741074	strain: 701B-08	100	0.25	0	0.351475	4443	Scaffold	735093	4.7	6	75	marine	normal
PRJNA262290	SAMN05661059	GCA_002934445.1	Nonlabens xylanidelens	Nonlabens xylanidelens	Nonlabens	Flavobacteriaceae	Flavobacteriales	Flavobacteriia	Bacteroidota	191564	strain: DSM 16809	98.54	0.19	0	0.346731	2998	Scaffold	469666	3.2	1	30	tidal flat	normal
PRJNA355359	SAMN06075358	GCA_002954325.1	Aureicoccus marinus	Aureicoccus marinus	Aureicoccus	Flavobacteriaceae	Flavobacteriales	Flavobacteriia	Bacteroidota	754435	strain: SG-18	97.33	0.66	0	0.458	2953	Scaffold	673360	3	1	36	marine	normal
PRJNA357140	SAMN06133457	GCA_002954605.1	Polaribacter butkevichii	Polaribacter butkevichii	Polaribacter	Flavobacteriaceae	Flavobacteriales	Flavobacteriia	Bacteroidota	218490	strain: KCTC 12100	99.66	1.35	7.69	0.304084	3385	Scaffold	250085	4	1	44	tidal flat	normal
PRJNA357139	SAMN06133456	GCA_002954645.1	Polaribacter gangjinensis	Polaribacter gangjinensis	Polaribacter	Flavobacteriaceae	Flavobacteriales	Flavobacteriia	Bacteroidota	574710	strain: KCTC 22729	99.33	0.78	0	0.314802	2552	Scaffold	180664	2.9	1	36	tidal flat	normal
PRJNA357142	SAMN06133459	GCA_002954665.1	Polaribacter glomeratus	Polaribacter glomeratus	Polaribacter	Flavobacteriaceae	Flavobacteriales	Flavobacteriia	Bacteroidota	102	strain: ATCC 43844	99.33	0.84	0	0.305865	3468	Scaffold	202903	4	1	35	marine	extreme
PRJNA357144	SAMN06133460	GCA_002954685.1	Polaribacter porphyrae	Polaribacter porphyrae	Polaribacter	Flavobacteriaceae	Flavobacteriales	Flavobacteriia	Bacteroidota	1137780	strain: NBRC 108759	99.66	0.62	0	0.290495	3506	Scaffold	346178	3.8	1	33	marine	normal
PRJNA434542	SAMN08563960	GCA_002966125.1	Pukyongia salina	Pukyongia salina	Pukyongia	Flavobacteriaceae	Flavobacteriales	Flavobacteriia	Bacteroidota	2094025	strain: RR4-38	99.24	0.19	0	0.418947	2877	Complete Genome	3182272	3.1	2	38	tidal flat	normal
PRJNA355342	SAMN06074326	GCA_002994045.1	Nonlabens agnitus	Nonlabens agnitus	Nonlabens	Flavobacteriaceae	Flavobacteriales	Flavobacteriia	Bacteroidota	870484	strain: JCM 17109	98.16	0.19	0	0.40947	2946	Scaffold	3187189	3.2	2	38	tidal flat	normal
PRJNA437528	SAMN08667564	GCA_003008425.1	Aurantibacter aestuarii	Aurantibacter aestuarii	Aurantibacter	Flavobacteriaceae	Flavobacteriales	Flavobacteriia	Bacteroidota	1266046	strain: KCTC 32269	99.67	0.37	0	0.321429	2636	Scaffold	898524	2.9	4	42	tidal flat	normal
PRJNA438727	SAMN08724768	GCA_003024155.1	Gramella fulva	Gramella fulva	Gramella	Flavobacteriaceae	Flavobacteriales	Flavobacteriia	Bacteroidota	2126553	strain: SH35	99.6	1.96	0	0.397048	3855	Complete Genome	4380140	4.3	3	46	tidal flat	normal
PRJNA443918	SAMN08779108	GCA_003054025.1	Capnocytophaga leadbetteri	Capnocytophaga leadbetteri	Capnocytophaga	Flavobacteriaceae	Flavobacteriales	Flavobacteriia	Bacteroidota	327575	strain: DSM 22902	100	0.48	0	0.397869	2375	Scaffold	138910	2.6	1	42	land	normal
PRJNA449408	SAMN08903377	GCA_003055625.1	Flavobacterium magnum	Flavobacterium magnum	Flavobacterium	Flavobacteriaceae	Flavobacteriales	Flavobacteriia	Bacteroidota	2162713	strain: HYN0048	99.53	0.37	0	0.469586	3001	Complete Genome	3464207	3.4	3	46	land	normal
PRJNA383909	SAMN06819498	GCA_003076455.1	Flavobacterium faecale	Flavobacterium faecale	Flavobacterium	Flavobacteriaceae	Flavobacteriales	Flavobacteriia	Bacteroidota	1355330	strain: WV33	99.29	0.27	0	0.351823	3819	Complete Genome	4621116	4.5	6	70	land	normal
PRJNA383908	SAMN06819499	GCA_003076475.1	Flavobacterium kingsejongi	Flavobacterium kingsejongi	Flavobacterium	Flavobacteriaceae	Flavobacteriales	Flavobacteriia	Bacteroidota	1678728	strain: WV39	99.29	0.82	33.33	0.397652	3824	Complete Genome	4224053	4.1	6	54	land	normal
PRJNA454190	SAMN08999466	GCA_003096035.1	Flavobacterium album	Flavobacterium album	Flavobacterium	Flavobacteriaceae	Flavobacteriales	Flavobacteriia	Bacteroidota	2175091	strain: HYN0059	99.29	0.53	0	0.445435	3609	Complete Genome	3983546	3.9	3	48	land	normal
PRJNA451402	SAMN08969845	GCA_003097535.1	Flavobacterium pallidum	Flavobacterium pallidum	Flavobacterium	Flavobacteriaceae	Flavobacteriales	Flavobacteriia	Bacteroidota	2172098	strain: HYN0049	99.18	0.35	0	0.43669	2982	Complete Genome	3552756	3.5	3	46	land	normal
PRJNA463036	SAMN09062264	GCA_003122385.1	Flavobacterium crocinum	Flavobacterium crocinum	Flavobacterium	Flavobacteriaceae	Flavobacteriales	Flavobacteriia	Bacteroidota	2183896	strain: HYN0056	99.65	0.55	20	0.339866	4920	Complete Genome	5877431	5.7	6	66	land	normal
PRJNA470823	SAMN09111996	GCA_003129485.1	Polaribacter aquimarinus	Polaribacter aquimarinus	Polaribacter	Flavobacteriaceae	Flavobacteriales	Flavobacteriia	Bacteroidota	2100726	strain: ZY113	99.66	0.55	0	0.300884	2982	Scaffold	556476	3.3	1	36	marine	normal
PRJNA470888	SAMN09195924	GCA_003143755.1	Algibacter marinivivus	Algibacter marinivivus	Algibacter	Flavobacteriaceae	Flavobacteriales	Flavobacteriia	Bacteroidota	2100723	strain: ZY111	99.67	0.17	0	0.318561	2949	Scaffold	940488	3.3	1	37	tidal flat	normal
PRJNA471281	SAMN09205926	GCA_003148385.1	Flavobacterium sediminis	Flavobacterium sediminis	Flavobacterium	Flavobacteriaceae	Flavobacteriales	Flavobacteriia	Bacteroidota	2201181	strain: MEBiC07310	98.22	0.82	0	0.352162	3285	Complete Genome	3441304	3.4	3	48	tidal flat	normal
PRJNA331476	SAMN05444378	GCA_003148525.1	Flavobacterium araucananum	Flavobacterium araucananum	Flavobacterium	Flavobacteriaceae	Flavobacteriales	Flavobacteriia	Bacteroidota	946678	strain: DSM 24704	99.65	1.15	0	0.343855	5060	Scaffold	438729	5.9	1	55	tidal flat	normal
PRJNA262266	SAMN05660201	GCA_003148645.1	Xanthomarina spongicola	Xanthomarina spongicola	Xanthomarina	Flavobacteriaceae	Flavobacteriales	Flavobacteriia	Bacteroidota	570520	strain: DSM 22637	99.67	0.11	0	0.312457	2925	Scaffold	404321	3.1	1	36	marine	normal
PRJNA262280	SAMN05660747	GCA_003148665.1	Maribacter polysiphoniae	Maribacter polysiphoniae	Maribacter	Flavobacteriaceae	Flavobacteriales	Flavobacteriia	Bacteroidota	429344	strain: DSM 23514	99.67	1.85	0	0.40302	4499	Scaffold	290338	5	2	39	tidal flat	normal
PRJNA471781	SAMN09217665	GCA_003149745.1	Muricauda koreensis	Muricauda koreensis	Muricauda	Flavobacteriaceae	Flavobacteriales	Flavobacteriia	Bacteroidota	2201895	strain: ECD12	99.34	0.71	0	0.37622	3361	Scaffold	1409164	3.5	1	36	marine	normal
PRJNA463316	SAMN09074750	GCA_003217215.1	Winogradskyella epiphytica	Winogradskyella epiphytica	Winogradskyella	Flavobacteriaceae	Flavobacteriales	Flavobacteriia	Bacteroidota	262005	strain: CECT 7945	98.1	0	0	0.342007	3009	Scaffold	751553	3.3	1	36	tidal flat	normal
PRJNA475323	SAMN09386782	GCA_003234935.1	Putridiphycobacter roseus	Putridiphycobacter roseus	Putridiphycobacter	Crocinitomicaceae	Flavobacteriales	Flavobacteriia	Bacteroidota	2219161	strain: SM1701	99.82	1.08	0	0.341041	3541	Scaffold	301943	4	3	36	marine	extreme
PRJNA262284	SAMN05660441	GCA_003253545.1	Mesonia algae	Mesonia algae	Mesonia	Flavobacteriaceae	Flavobacteriales	Flavobacteriia	Bacteroidota	213248	strain: DSM 15361	99.24	0.19	0	0.331416	2875	Scaffold	310925	3	1	36	marine	normal
PRJNA262286	SAMN05660418	GCA_003254015.1	Nonlabens dokdonensis	Nonlabens dokdonensis	Nonlabens	Flavobacteriaceae	Flavobacteriales	Flavobacteriia	Bacteroidota	328515	strain: DSM 17205	98.54	0.19	0	0.352478	3462	Scaffold	334272	3.8	2	42	tidal flat	normal
PRJNA262265	SAMN05660858	GCA_003259265.1	Gelidibacter algens	Gelidibacter algens	Gelidibacter	Flavobacteriaceae	Flavobacteriales	Flavobacteriia	Bacteroidota	49280	strain: DSM 12408	99.67	1.24	0	0.372082	3886	Scaffold	181689	4.4	1	36	marine	extreme
PRJNA262075	SAMN03080605	GCA_003259375.1	Arenibacter echinorum	Arenibacter echinorum	Arenibacter	Flavobacteriaceae	Flavobacteriales	Flavobacteriia	Bacteroidota	440515	strain: DSM 23522	99.67	1.41	0	0.393261	4383	Scaffold	554361	5.1	1	37	marine	normal
PRJNA262297	SAMN05660851	GCA_003259525.1	Olleya aquimaris	Olleya aquimaris	Olleya	Flavobacteriaceae	Flavobacteriales	Flavobacteriia	Bacteroidota	639310	strain: DSM 24464	99.67	0	0	0.322435	2657	Scaffold	318730	2.9	3	38	tidal flat	normal
PRJNA370086	SAMN06297150	GCA_003259835.1	Flavobacterium aquaticum	Flavobacterium aquaticum	Flavobacterium	Flavobacteriaceae	Flavobacteriales	Flavobacteriia	Bacteroidota	1236486	strain: CGMCC 1.12398	99.65	0.02	0	0.324748	2591	Scaffold	401964	2.8	1	48	land	normal
PRJNA370093	SAMN06296443	GCA_003268815.1	Flavobacterium lacus	Flavobacterium lacus	Flavobacterium	Flavobacteriaceae	Flavobacteriales	Flavobacteriia	Bacteroidota	1353778	strain: CGMCC 1.12504	99.65	0	0	0.348858	3061	Scaffold	209750	3.5	1	41	land	normal
PRJNA402477	SAMN07621123	GCA_003268855.1	Flavobacterium aciduliphilum	Flavobacterium aciduliphilum	Flavobacterium	Flavobacteriaceae	Flavobacteriales	Flavobacteriia	Bacteroidota	1101402	strain: DSM 25663	99.29	0.18	0	0.339473	2544	Scaffold	214229	2.7	1	39	land	normal
PRJNA449135	SAMN09428147	GCA_003269425.1	Muricauda aurantiaca	Muricauda aurantiaca	Muricauda	Flavobacteriaceae	Flavobacteriales	Flavobacteriia	Bacteroidota	1383885	strain: HME9304	99.01	0.17	0	0.380691	3379	Complete Genome	3772469	3.7	2	39	marine	normal
PRJNA476813	SAMN09459912	GCA_003293845.1	Flavobacterium tibetense	Flavobacterium tibetense	Flavobacterium	Flavobacteriaceae	Flavobacteriales	Flavobacteriia	Bacteroidota	2233533	strain: YH5	99.65	0.35	0	0.332103	2572	Scaffold	183456	2.7	3	43	tidal flat	normal
PRJNA477904	SAMN09487226	GCA_003312915.1	Flavobacterium fluviale	Flavobacterium fluviale	Flavobacterium	Flavobacteriaceae	Flavobacteriales	Flavobacteriia	Bacteroidota	2249356	strain: HYN0086	99.65	0.19	0	0.338747	4130	Complete Genome	4839571	4.7	6	62	land	normal
PRJNA463313	SAMN09074796	GCA_003337305.1	Winogradskyella arenosi	Winogradskyella arenosi	Winogradskyella	Flavobacteriaceae	Flavobacteriales	Flavobacteriia	Bacteroidota	533325	strain: CECT 7958	99.67	0.11	0	0.356833	3195	Scaffold	567109	3.6	1	39	marine	normal
PRJNA456023	SAMN09064522	GCA_003337435.1	Schleiferia thermophila	Schleiferia thermophila	Schleiferia	Schleiferiaceae	Flavobacteriales	Flavobacteriia	Bacteroidota	884107	strain: DSM 21410	100	0	0	0.429287	2263	Scaffold	517830	2.6	1	36	land	normal
PRJNA482171	SAMN09699165	GCA_003344925.1	Flavobacterium arcticum	Flavobacterium arcticum	Flavobacterium	Flavobacteriaceae	Flavobacteriales	Flavobacteriia	Bacteroidota	1784713	strain: SM1502	99.65	0.53	0	0.349928	2655	Complete Genome	2970356	2.9	3	44	marine	extreme
PRJNA463393	SAMN09074696	GCA_003350545.1	Flavobacterium glaciei	Flavobacterium glaciei	Flavobacterium	Flavobacteriaceae	Flavobacteriales	Flavobacteriia	Bacteroidota	386300	strain: DSM 19728	99.65	0	0	0.334073	2750	Scaffold	176045	3.1	1	45	land	extreme
PRJNA442666	SAMN08776299	GCA_003353425.1	Marinirhabdus gelatinilytica	Marinirhabdus gelatinilytica	Marinirhabdus	Flavobacteriaceae	Flavobacteriales	Flavobacteriia	Bacteroidota	1703343	strain: DSM 101478	98.86	0	0	0.412706	2994	Scaffold	271410	3.2	0	30	marine	normal
PRJNA443920	SAMN08778575	GCA_003385115.1	Flavobacterium aquicola	Flavobacterium aquicola	Flavobacterium	Flavobacteriaceae	Flavobacteriales	Flavobacteriia	Bacteroidota	1682742	strain: DSM 100880	99.29	0.18	0	0.341997	4369	Scaffold	299391	5	1	45	land	normal
PRJNA335219	SAMN05444268	GCA_003385895.1	Flavobacterium cutihirudinis	Flavobacterium cutihirudinis	Flavobacterium	Flavobacteriaceae	Flavobacteriales	Flavobacteriia	Bacteroidota	1265740	strain: DSM 25795	99.65	0.23	0	0.33898	4092	Scaffold	775249	4.8	1	54	land	normal
PRJNA463315	SAMN09075500	GCA_003386165.1	Winogradskyella eximia	Winogradskyella eximia	Winogradskyella	Flavobacteriaceae	Flavobacteriales	Flavobacteriia	Bacteroidota	262006	strain: CECT 7946	99.67	1.17	0	0.323627	3690	Scaffold	303843	4.1	1	36	tidal flat	normal
PRJNA463307	SAMN09074747	GCA_003386195.1	Seonamhaeicola aphaedonensis	Seonamhaeicola aphaedonensis	Seonamhaeicola	Flavobacteriaceae	Flavobacteriales	Flavobacteriia	Bacteroidota	1461338	strain: CECT 8487	99.01	0.92	0	0.337225	2982	Scaffold	326924	3.4	1	38	tidal flat	normal
PRJNA463314	SAMN09074797	GCA_003386275.1	Winogradskyella pacifica	Winogradskyella pacifica	Winogradskyella	Flavobacteriaceae	Flavobacteriales	Flavobacteriia	Bacteroidota	664642	strain: CECT 7948	99.67	1.06	0	0.33326	3742	Scaffold	373642	4.2	1	42	tidal flat	normal
PRJNA439989	SAMN08770175	GCA_003387615.1	Tenacibaculum gallaicum	Tenacibaculum gallaicum	Tenacibaculum	Flavobacteriaceae	Flavobacteriales	Flavobacteriia	Bacteroidota	561505	strain: DSM 18841	99.66	0.67	0	0.317427	3134	Scaffold	227957	3.4	1	48	tidal flat	normal
PRJNA484275	SAMN09762457	GCA_003402975.1	Brumimicrobium aurantiacum	Brumimicrobium aurantiacum	Brumimicrobium	Crocinitomicaceae	Flavobacteriales	Flavobacteriia	Bacteroidota	1737063	strain: N62	100	0	0	0.338788	2986	Scaffold	245212	3.4	1	35	tidal flat	normal
PRJNA437398	SAMN09939643	GCA_003581615.1	Muricauda lutimaris	Muricauda lutimaris	Muricauda	Flavobacteriaceae	Flavobacteriales	Flavobacteriia	Bacteroidota	475082	strain: KCTC 22173	99.34	0.75	0	0.401071	3443	Scaffold	468030	3.6	4	43	tidal flat	normal
PRJNA437398	SAMN09939642	GCA_003584105.1	Muricauda taeanensis	Muricauda taeanensis	Muricauda	Flavobacteriaceae	Flavobacteriales	Flavobacteriia	Bacteroidota	1005926	strain: JCM 17757	100	3.34	100	0.456054	3722	Scaffold	279085	4	4	48	tidal flat	normal
PRJNA437398	SAMN09939641	GCA_003584135.1	Muricauda maritima	Muricauda maritima	Muricauda	Flavobacteriaceae	Flavobacteriales	Flavobacteriia	Bacteroidota	2306998	strain: 72	99.01	1.65	0	0.43382	3924	Scaffold	299254	4.2	4	44	marine	normal
PRJNA437398	SAMN09939640	GCA_003584165.1	Muricauda aequoris	Muricauda aequoris	Muricauda	Flavobacteriaceae	Flavobacteriales	Flavobacteriia	Bacteroidota	2306997	strain: NH166	99.5	1.97	0	0.433742	3890	Scaffold	302955	4.1	4	41	marine	normal
PRJNA363571	SAMN06265172	GCA_003610635.1	Ichthyenterobacterium magnum	Ichthyenterobacterium magnum	Ichthyenterobacterium	Flavobacteriaceae	Flavobacteriales	Flavobacteriia	Bacteroidota	1230530	strain: DSM 26283	99.01	0.83	0	0.313604	2763	Scaffold	476736	3	1	34	tidal flat	normal
PRJNA443677	SAMN08778569	GCA_003610735.1	Tenacibaculum lutimaris	Tenacibaculum lutimaris	Tenacibaculum	Flavobacteriaceae	Flavobacteriales	Flavobacteriia	Bacteroidota	285258	strain: DSM 16505	99.55	0.5	0	0.318966	2664	Scaffold	423679	2.8	1	43	tidal flat	normal
PRJNA402513	SAMN07621896	GCA_003634105.1	Maribacter vaceletii	Maribacter vaceletii	Maribacter	Flavobacteriaceae	Flavobacteriales	Flavobacteriia	Bacteroidota	1206816	strain: DSM 25230	99.67	0.33	0	0.317029	3343	Scaffold	771605	3.8	1	34	marine	normal
PRJNA402516	SAMN07620976	GCA_003634455.1	Flavobacterium endophyticum	Flavobacterium endophyticum	Flavobacterium	Flavobacteriaceae	Flavobacteriales	Flavobacteriia	Bacteroidota	1540163	strain: DSM 29537	99.65	0	0	0.391079	3356	Scaffold	447913	3.7	1	47	land	normal
PRJNA331690	SAMN05444482	GCA_003634585.1	Gillisia mitskevichiae	Gillisia mitskevichiae	Gillisia	Flavobacteriaceae	Flavobacteriales	Flavobacteriia	Bacteroidota	270921	strain: DSM 19839	99.62	0	0	0.340903	3250	Scaffold	1138608	3.5	1	40	tidal flat	normal
PRJNA329859	SAMN05421836	GCA_003634775.1	Chryseobacterium defluvii	Chryseobacterium defluvii	Chryseobacterium	Weeksellaceae	Flavobacteriales	Flavobacteriia	Bacteroidota	160396	strain: DSM 14219	100	0	0	0.365572	3434	Scaffold	1111720	3.6	1	63	land	normal
PRJNA487991	SAMN09915277	GCA_003687485.1	Euzebyella marina	Euzebyella marina	Euzebyella	Flavobacteriaceae	Flavobacteriales	Flavobacteriia	Bacteroidota	1761453	strain: RN62	99.65	1.1	50	0.40155	4065	Complete Genome	4707469	4.6	2	38	marine	normal
PRJNA497206	SAMN10250722	GCA_003687725.1	Faecalibacter macacae	Faecalibacter macacae	Faecalibacter	Weeksellaceae	Flavobacteriales	Flavobacteriia	Bacteroidota	1859289	strain: YIM 102668	100	0	0	0.305855	2700	Scaffold	140574	2.8	1	72	land	normal
PRJNA363566	SAMN06264851	GCA_003688405.1	Ulvibacter antarcticus	Ulvibacter antarcticus	Ulvibacter	Flavobacteriaceae	Flavobacteriales	Flavobacteriia	Bacteroidota	442714	strain: DSM 23424	99.24	0	0	0.367017	3398	Scaffold	912414	3.8	1	35	tidal flat	extreme
PRJNA497172	SAMN10250232	GCA_003688895.1	Dokdonia sinensis	Dokdonia sinensis	Dokdonia	Flavobacteriaceae	Flavobacteriales	Flavobacteriia	Bacteroidota	2479847	strain: SH27	99.62	0	0	0.395324	3246	Scaffold	219520	3.6	1	39	marine	normal
PRJNA498534	SAMN10343193	GCA_003815615.1	Chryseobacterium shandongense	Chryseobacterium shandongense	Chryseobacterium	Weeksellaceae	Flavobacteriales	Flavobacteriia	Bacteroidota	1493872	strain: G0239	100	0.49	0	0.368848	3956	Complete Genome	4390955	4.3	5	66	land	normal
PRJNA498534	SAMN10343188	GCA_003815695.1	Chryseobacterium carnipullorum	Chryseobacterium carnipullorum	Chryseobacterium	Weeksellaceae	Flavobacteriales	Flavobacteriia	Bacteroidota	1124835	strain: G0188	99.93	0.25	0	0.371197	5002	Complete Genome	5459074	5.3	7	88	land	normal
PRJNA498534	SAMN05421768	GCA_003815775.1	Chryseobacterium joostei	Chryseobacterium joostei	Chryseobacterium	Weeksellaceae	Flavobacteriales	Flavobacteriia	Bacteroidota	112234	strain: DSM 16927	100	0.74	0	0.354474	4455	Complete Genome	4860412	4.8	7	87	land	normal
PRJNA498534	SAMN10343183	GCA_003815875.1	Chryseobacterium lactis	Chryseobacterium lactis	Chryseobacterium	Weeksellaceae	Flavobacteriales	Flavobacteriia	Bacteroidota	1241981	strain: KC_1864	100	0.25	0	0.361343	5034	Complete Genome	5618212	5.5	6	85	land	normal
PRJNA498534	SAMN05421682	GCA_003815915.1	Chryseobacterium indoltheticum	Chryseobacterium indoltheticum	Chryseobacterium	Weeksellaceae	Flavobacteriales	Flavobacteriia	Bacteroidota	254	strain: ATCC 27950	100	0	0	0.342766	3903	Complete Genome	4253895	4.2	6	78	marine	normal
PRJNA498534	SAMN10343177	GCA_003815975.1	Chryseobacterium bernardetii	Chryseobacterium bernardetii	Chryseobacterium	Weeksellaceae	Flavobacteriales	Flavobacteriia	Bacteroidota	1241978	strain: G0229	100	0.25	0	0.363245	4844	Complete Genome	5318634	5.2	7	94	land	normal
PRJNA498534	SAMN10316127	GCA_003815995.1	Chryseobacterium balustinum	Chryseobacterium balustinum	Chryseobacterium	Weeksellaceae	Flavobacteriales	Flavobacteriia	Bacteroidota	246	strain: KC_1863	100	0	0	0.337358	4616	Complete Genome	4865895	4.9	8	77	marine	normal
PRJNA505588	SAMN10426407	GCA_003858535.1	Flavobacterium viscosum	Flavobacterium viscosum	Flavobacterium	Flavobacteriaceae	Flavobacteriales	Flavobacteriia	Bacteroidota	2488729	strain: YIM 102796	98.45	0.53	0	0.337521	2884	Scaffold	76371	2.9	1	70	land	normal
PRJNA498692	SAMN10343180	GCA_003860525.1	Epilithonimonas vandammei	Epilithonimonas vandammei	Epilithonimonas	Weeksellaceae	Flavobacteriales	Flavobacteriia	Bacteroidota	2487072	strain: F5649	100	0	0	0.360205	3046	Complete Genome	3276391	3.2	3	44	land	normal
PRJNA498694	SAMN10343189	GCA_003860545.1	Chryseobacterium taklimakanense	Chryseobacterium taklimakanense	Chryseobacterium	Weeksellaceae	Flavobacteriales	Flavobacteriia	Bacteroidota	536441	strain: F9257	100	0.74	0	0.406929	2362	Complete Genome	2538787	2.5	2	40	land	extreme
PRJNA498697	SAMN05731713	GCA_003860565.1	Cloacibacterium normanense	Cloacibacterium normanense	Cloacibacterium	Weeksellaceae	Flavobacteriales	Flavobacteriia	Bacteroidota	237258	strain: NRS-1	100	0.25	0	0.330605	2539	Complete Genome	2759562	2.7	2	39	land	normal
PRJNA498690	SAMN10343178	GCA_003860585.1	Kaistella carnis	Kaistella carnis	Kaistella	Weeksellaceae	Flavobacteriales	Flavobacteriia	Bacteroidota	1241979	strain: G0081	100	1.47	0	0.3634	2981	Complete Genome	3230102	3.2	4	46	land	normal
PRJNA505774	SAMN10434608	GCA_003865365.1	Flavobacterium macacae	Flavobacterium macacae	Flavobacterium	Flavobacteriaceae	Flavobacteriales	Flavobacteriia	Bacteroidota	2488993	strain: YIM 102600	99.29	1.06	0	0.366425	3135	Scaffold	172194	3.3	1	42	land	normal
PRJNA505587	SAMN10426406	GCA_003865405.1	Flavobacterium tangerinum	Flavobacterium tangerinum	Flavobacterium	Flavobacteriaceae	Flavobacteriales	Flavobacteriia	Bacteroidota	2488728	strain: YIM 102701-2	99.53	2.12	84.62	0.30908	3285	Scaffold	76037	3.4	1	61	land	normal
PRJNA492832	SAMN10107882	GCA_003867015.1	Tenacibaculum singaporense	Tenacibaculum singaporense	Tenacibaculum	Flavobacteriaceae	Flavobacteriales	Flavobacteriia	Bacteroidota	2358479	strain: DSM 106434	99.66	0.67	0	0.320057	3176	Chromosome	3511704	3.4	4	53	land	normal
PRJNA493172	SAMN10130967	GCA_003867075.1	Tenacibaculum mesophilum	Tenacibaculum mesophilum	Tenacibaculum	Flavobacteriaceae	Flavobacteriales	Flavobacteriia	Bacteroidota	104268	strain: DSM 13764	100	4.39	100	0.317989	3010	Chromosome	3344078	3.3	5	56	marine	normal
PRJNA505769	SAMN10434498	GCA_003946915.1	Flavobacterium ustbae	Flavobacterium ustbae	Flavobacterium	Flavobacteriaceae	Flavobacteriales	Flavobacteriia	Bacteroidota	2488790	strain: T13	98.94	0.49	0	0.341734	4179	Scaffold	256095	4.8	1	56	land	normal
PRJNA505890	SAMN10458232	GCA_003957295.1	Arenibacter aquaticus	Arenibacter aquaticus	Arenibacter	Flavobacteriaceae	Flavobacteriales	Flavobacteriia	Bacteroidota	2489054	strain: GUO	99.67	0.73	0	0.401289	4164	Scaffold	821621	5.1	1	37	marine	normal
PRJNA509982	SAMN10591627	GCA_003966335.1	Nonlabens ponticola	Nonlabens ponticola	Nonlabens	Flavobacteriaceae	Flavobacteriales	Flavobacteriia	Bacteroidota	2496866	strain: MJ115	98.16	0.57	100	0.407001	2610	Complete Genome	2872100	2.8	2	36	marine	normal
PRJNA510508	SAMN10606319	GCA_003970355.1	Flavobacterium bomense	Flavobacterium bomense	Flavobacterium	Flavobacteriaceae	Flavobacteriales	Flavobacteriia	Bacteroidota	2497483	strain: RB1N8	99.29	3.08	28.81	0.347877	3583	Scaffold	146079	3.8	1	43	land	extreme
PRJNA510459	SAMN10605323	GCA_003971235.1	Chryseobacterium aureum	Chryseobacterium aureum	Chryseobacterium	Weeksellaceae	Flavobacteriales	Flavobacteriia	Bacteroidota	2497456	strain: 17S1E7	100	0	0	0.373982	4557	Chromosome	5069754	4.9	6	88	land	normal
PRJNA437398	SAMN10644078	GCA_003992595.1	Muricauda oceanensis	Muricauda oceanensis	Muricauda	Flavobacteriaceae	Flavobacteriales	Flavobacteriia	Bacteroidota	2499163	strain: 40DY170	99.34	0.5	0	0.424182	3909	Scaffold	176150	4.2	4	52	marine	normal
PRJNA437398	SAMN10644007	GCA_003992615.1	Muricauda beolgyonensis	Muricauda beolgyonensis	Muricauda	Flavobacteriaceae	Flavobacteriales	Flavobacteriia	Bacteroidota	864064	strain: KCTC 23501	99.67	2.07	10	0.436253	3467	Scaffold	480118	3.7	4	42	tidal flat	normal
PRJNA437398	SAMN10644077	GCA_003992675.1	Muricauda aquimarina	Muricauda aquimarina	Muricauda	Flavobacteriaceae	Flavobacteriales	Flavobacteriia	Bacteroidota	254955	strain: JCM11811	99.01	0.33	0	0.434338	3106	Scaffold	345293	3.4	4	42	land	extreme
PRJNA487144	SAMN09874187	GCA_003996965.1	Flavobacterium cupreum	Flavobacterium cupreum	Flavobacterium	Flavobacteriaceae	Flavobacteriales	Flavobacteriia	Bacteroidota	2133766	strain: CCM 8825	99.65	1.69	0	0.372216	5223	Scaffold	341169	5.8	3	50	land	extreme
PRJNA512963	SAMN10691118	GCA_004014855.1	Apibacter raozihei	Apibacter raozihei	Apibacter	Weeksellaceae	Flavobacteriales	Flavobacteriia	Bacteroidota	2500547	strain: HY041	100	0	0	0.321626	2910	Complete Genome	3293048	3.2	3	43	land	normal
PRJNA515365	SAMN10754312	GCA_004139715.1	Muriicola soli	Muriicola soli	Muriicola	Flavobacteriaceae	Flavobacteriales	Flavobacteriia	Bacteroidota	2507538	strain: MMS17-SY002	98.6	0.18	0	0.424272	2899	Complete Genome	3067493	3	2	40	land	normal
PRJNA244114	SAMN02722729	GCA_004150225.1	Muricauda olearia	Muricauda olearia	Muricauda	Flavobacteriaceae	Flavobacteriales	Flavobacteriia	Bacteroidota	552546	strain: Th120	99.34	0.66	0	0.438643	3622	Scaffold	362728	3.9	1	36	marine	normal
PRJNA519309	SAMN10864810	GCA_004216895.1	Aquimarina brevivitae	Aquimarina brevivitae	Aquimarina	Flavobacteriaceae	Flavobacteriales	Flavobacteriia	Bacteroidota	323412	strain: DSM 17196	99.62	0.05	0	0.357722	3427	Scaffold	1058603	3.8	1	43	tidal flat	normal
PRJNA521427	SAMN10887835	GCA_004296335.1	Muricauda hymeniacidonis	Muricauda hymeniacidonis	Muricauda	Flavobacteriaceae	Flavobacteriales	Flavobacteriia	Bacteroidota	2517819	strain: 176CP4-71	99.34	0.66	0	0.416749	3357	Scaffold	1493266	3.5	1	37	marine	normal
PRJNA525347	SAMN11047481	GCA_004337635.1	Myroides odoratimimus	Myroides odoratimimus	Myroides	Flavobacteriaceae	Flavobacteriales	Flavobacteriia	Bacteroidota	76832	strain: G13	99.65	0.35	33.33	0.341979	3495	Complete Genome	3894807	3.9	9	112	land	normal
PRJNA519308	SAMN10864849	GCA_004341235.1	Mariniflexile fucanivorans	Mariniflexile fucanivorans	Mariniflexile	Flavobacteriaceae	Flavobacteriales	Flavobacteriia	Bacteroidota	264023	strain: DSM 18792	99.01	2.58	7.69	0.331913	3998	Scaffold	432915	4.6	1	39	land	normal
PRJNA519255	SAMN10864715	GCA_004345565.1	Flavobacterium circumlabens	Flavobacterium circumlabens	Flavobacterium	Flavobacteriaceae	Flavobacteriales	Flavobacteriia	Bacteroidota	2133765	strain: P5626	99.65	0.88	0	0.358455	4870	Scaffold	388869	5.6	1	48	land	extreme
PRJNA519307	SAMN10864689	GCA_004345825.1	Tenacibaculum skagerrakense	Tenacibaculum skagerrakense	Tenacibaculum	Flavobacteriaceae	Flavobacteriales	Flavobacteriia	Bacteroidota	186571	strain: DSM 14836	99.66	0.21	0	0.312489	3334	Scaffold	292242	3.6	1	50	marine	normal
PRJNA463310	SAMN09075499	GCA_004346845.1	Winogradskyella wandonensis	Winogradskyella wandonensis	Winogradskyella	Flavobacteriaceae	Flavobacteriales	Flavobacteriia	Bacteroidota	1442586	strain: CECT 8445	99.34	0	0	0.348406	2708	Scaffold	653019	2.9	1	36	tidal flat	normal
PRJNA526406	SAMN11098580	GCA_004355225.1	Flavobacterium nackdongense	Flavobacterium nackdongense	Flavobacterium	Flavobacteriaceae	Flavobacteriales	Flavobacteriia	Bacteroidota	2547394	strain: GS13	98.59	0.35	0	0.361995	3540	Complete Genome	4217227	4.1	3	46	land	normal
PRJNA526595	SAMN11104548	GCA_004359195.1	Chryseobacterium salivictor	Chryseobacterium salivictor	Chryseobacterium	Weeksellaceae	Flavobacteriales	Flavobacteriia	Bacteroidota	2547600	strain: NBC 122	100	1.63	0	0.375221	2849	Complete Genome	3139453	3.1	4	48	land	normal
PRJNA331475	SAMN05443430	GCA_004362665.1	Flavobacterium dankookense	Flavobacterium dankookense	Flavobacterium	Flavobacteriaceae	Flavobacteriales	Flavobacteriia	Bacteroidota	706186	strain: DSM 25687	99.29	0.12	0	0.324407	2815	Scaffold	424663	3.2	1	36	land	normal
PRJNA402504	SAMN07621945	GCA_004362865.1	Zeaxanthinibacter enoshimensis	Zeaxanthinibacter enoshimensis	Zeaxanthinibacter	Flavobacteriaceae	Flavobacteriales	Flavobacteriia	Bacteroidota	392009	strain: DSM 18435	99.34	0.5	0	0.463996	2934	Scaffold	709771	3.3	1	38	tidal flat	normal
PRJNA463312	SAMN09074749	GCA_004363005.1	Tenacibaculum caenipelagi	Tenacibaculum caenipelagi	Tenacibaculum	Flavobacteriaceae	Flavobacteriales	Flavobacteriia	Bacteroidota	1325435	strain: CECT 8283	99.66	1.01	0	0.318813	3113	Scaffold	340625	3.2	1	46	tidal flat	normal
PRJNA402512	SAMN07621485	GCA_004364165.1	Maribacter spongiicola	Maribacter spongiicola	Maribacter	Flavobacteriaceae	Flavobacteriales	Flavobacteriia	Bacteroidota	1206753	strain: DSM 25233	99.67	0.33	0	0.35127	3851	Scaffold	1103697	4.4	1	38	marine	normal
PRJNA463308	SAMN09074795	GCA_004364175.1	Maribacter caenipelagi	Maribacter caenipelagi	Maribacter	Flavobacteriaceae	Flavobacteriales	Flavobacteriia	Bacteroidota	1447781	strain: CECT 8455	99.67	1.08	0	0.351832	3767	Scaffold	409143	4.2	1	37	tidal flat	normal
PRJNA443923	SAMN08778583	GCA_004364575.1	Myroides indicus	Myroides indicus	Myroides	Flavobacteriaceae	Flavobacteriales	Flavobacteriia	Bacteroidota	1323422	strain: DSM 28213	99.29	0	0	0.345327	2735	Scaffold	81601	3	1	63	land	normal
PRJNA363573	SAMN06264850	GCA_004364975.1	Gelidibacter sediminis	Gelidibacter sediminis	Gelidibacter	Flavobacteriaceae	Flavobacteriales	Flavobacteriia	Bacteroidota	1608710	strain: DSM 28135	99.67	0.33	0	0.368722	3090	Scaffold	834590	3.5	1	36	marine	normal
PRJNA323125	SAMN05216211	GCA_004366715.1	Meridianimaribacter flavus	Meridianimaribacter flavus	Meridianimaribacter	Flavobacteriaceae	Flavobacteriales	Flavobacteriia	Bacteroidota	571115	strain: CGMCC 1.10957	99.67	0.33	0	0.331754	2874	Scaffold	428340	3.2	3	39	marine	normal
PRJNA463311	SAMN09074748	GCA_004368925.1	Algibacter lectus	Algibacter lectus	Algibacter	Flavobacteriaceae	Flavobacteriales	Flavobacteriia	Bacteroidota	221126	strain: CECT 8301	99.67	0.79	0	0.33263	3855	Scaffold	548931	4.6	1	40	marine	normal
PRJNA530097	SAMN11295120	GCA_004745595.1	Flavobacterium humi	Flavobacterium humi	Flavobacterium	Flavobacteriaceae	Flavobacteriales	Flavobacteriia	Bacteroidota	2562683	strain: DS2-A	99.29	0	0	0.407487	3148	Scaffold	388382	3.5	2	42	land	normal
PRJNA521668	SAMN10908541	GCA_004797125.1	Flavobacterium sangjuense	Flavobacterium sangjuense	Flavobacterium	Flavobacteriaceae	Flavobacteriales	Flavobacteriia	Bacteroidota	2518177	strain: GS03	98.35	0.35	0	0.360973	2643	Complete Genome	3130338	3.1	3	40	land	normal
PRJNA383097	SAMN06759395	GCA_004803875.1	Tenacibaculum maritimum	Tenacibaculum maritimum	Tenacibaculum	Flavobacteriaceae	Flavobacteriales	Flavobacteriia	Bacteroidota	107401	strain: TM-KORJJ	99.22	0.67	50	0.319753	2926	Complete Genome	3333272	3.3	6	58	land	normal
PRJNA530125	SAMN11296756	GCA_004804315.1	Muricauda onchidii	Muricauda onchidii	Muricauda	Flavobacteriaceae	Flavobacteriales	Flavobacteriia	Bacteroidota	2562684	strain: XY-359	99.65	0.38	0	0.390654	3927	Scaffold	186183	4.1	1	36	land	normal
PRJNA531330	SAMN11356677	GCA_005047595.1	Pontimicrobium aquaticum	Pontimicrobium aquaticum	Pontimicrobium	Flavobacteriaceae	Flavobacteriales	Flavobacteriia	Bacteroidota	2565367	strain: CAU 1491	99.34	2.15	0	0.324002	3077	Scaffold	402144	3.3	1	35	tidal flat	normal
PRJNA542499	SAMN11625834	GCA_005885635.1	Maribacter algarum	Maribacter algarum	Maribacter	Flavobacteriaceae	Flavobacteriales	Flavobacteriia	Bacteroidota	2578118	strain: RZ26	99.67	1.23	0	0.379696	4463	Scaffold	1114618	5	1	54	tidal flat	normal
PRJNA544996	SAMN11867830	GCA_005943945.1	Aggregatimonas sangjinii	Aggregatimonas sangjinii	Aggregatimonas	Flavobacteriaceae	Flavobacteriales	Flavobacteriia	Bacteroidota	2583587	strain: F202Z8	99.56	0.66	0	0.432554	4030	Complete Genome	4723614	4.6	2	40	tidal flat	normal
PRJNA544404	SAMN11835398	GCA_006065315.1	Aureibaculum algae	Aureibaculum algae	Aureibaculum	Flavobacteriaceae	Flavobacteriales	Flavobacteriia	Bacteroidota	2584122	strain: 10Alg 115	98.32	2.07	0	0.322092	4406	Complete Genome	5168958	5	2	39	marine	normal
PRJNA540209	SAMN11524361	GCA_006120725.1	Mesohalobacter halotolerans	Mesohalobacter halotolerans	Mesohalobacter	Flavobacteriaceae	Flavobacteriales	Flavobacteriia	Bacteroidota	1883405	strain: WDS2C27	99.14	0	0	0.350157	2403	Scaffold	607857	2.6	1	37	tidal flat	extreme
PRJNA542571	SAMN11633688	GCA_006148925.1	Algibacter aestuarii	Algibacter aestuarii	Algibacter	Flavobacteriaceae	Flavobacteriales	Flavobacteriia	Bacteroidota	912802	strain: KCTC 23449	99.67	0.21	0	0.331754	2835	Scaffold	2105248	3.1	2	37	marine	normal
PRJNA545845	SAMN11935687	GCA_006159205.1	Antarcticibacterium flavum	Antarcticibacterium flavum	Antarcticibacterium	Flavobacteriaceae	Flavobacteriales	Flavobacteriia	Bacteroidota	2058175	strain: KCTC 52984	99.62	1.17	20	0.408562	3940	Complete Genome	4353683	4.3	3	46	marine	normal
PRJNA545006	SAMN11869186	GCA_006381105.1	Flavicella sediminum	Flavicella sediminum	Flavicella	Flavobacteriaceae	Flavobacteriales	Flavobacteriia	Bacteroidota	2585141	strain: ALS 84	97.35	1.79	10	0.335893	3603	Scaffold	524071	4.5	1	47	marine	normal
PRJNA548071	SAMN11998959	GCA_006491595.2	Flavobacterium jejuense	Flavobacterium jejuense	Flavobacterium	Flavobacteriaceae	Flavobacteriales	Flavobacteriia	Bacteroidota	1544455	strain: EC11	99.65	0	0	0.299305	4279	Scaffold	257751	4.6	1	48	marine	normal
PRJNA545843	SAMN11935611	GCA_006491645.1	Flavobacterium profundi	Flavobacterium profundi	Flavobacterium	Flavobacteriaceae	Flavobacteriales	Flavobacteriia	Bacteroidota	1774945	strain: TP390	99.29	0.35	0	0.312356	3683	Scaffold	222460	3.9	1	47	marine	normal
PRJNA549815	SAMN12098056	GCA_006494535.1	Paucihalobacter ruber	Paucihalobacter ruber	Paucihalobacter	Flavobacteriaceae	Flavobacteriales	Flavobacteriia	Bacteroidota	2567861	strain: CWB-1	99.34	0	0	0.36307	3143	Scaffold	353272	3.5	1	36	land	extreme
PRJNA538303	SAMN11512334	GCA_006716485.1	Chryseobacterium aquifrigidense	Chryseobacterium aquifrigidense	Chryseobacterium	Weeksellaceae	Flavobacteriales	Flavobacteriia	Bacteroidota	558021	strain: 110	100	0.25	0	0.364709	4639	Scaffold	438948	5	1	74	land	normal
PRJNA533199	SAMN11445384	GCA_006974145.1	Changchengzhania lutea	Changchengzhania lutea	Changchengzhania	Flavobacteriaceae	Flavobacteriales	Flavobacteriia	Bacteroidota	2049305	strain: SM1355	99.34	1.32	0	0.347964	3726	Complete Genome	4130958	4	2	41	tidal flat	normal
PRJNA553297	SAMN12233515	GCA_007097245.1	Flavobacterium restrictum	Flavobacterium restrictum	Flavobacterium	Flavobacteriaceae	Flavobacteriales	Flavobacteriia	Bacteroidota	2594428	strain: LB1R34	99.29	0.18	0	0.35742	3260	Scaffold	165598	3.7	1	39	land	extreme
PRJNA553297	SAMN12233522	GCA_007097285.1	Flavobacterium gawalongense	Flavobacterium gawalongense	Flavobacterium	Flavobacteriaceae	Flavobacteriales	Flavobacteriia	Bacteroidota	2594432	strain: GSR18	99.29	0.71	0	0.338911	3551	Scaffold	112679	4	1	41	land	extreme
PRJNA553297	SAMN12233517	GCA_007097365.1	Flavobacterium franklandianum	Flavobacterium franklandianum	Flavobacterium	Flavobacteriaceae	Flavobacteriales	Flavobacteriia	Bacteroidota	2594430	strain: LB3P56	98.94	0.53	0	0.341753	3253	Scaffold	261091	3.7	1	40	land	extreme
PRJNA553300	SAMN12233528	GCA_007197735.1	Formosa sediminum	Formosa sediminum	Formosa	Flavobacteriaceae	Flavobacteriales	Flavobacteriia	Bacteroidota	2594004	strain: PS13	98.84	0.35	0	0.322267	3405	Complete Genome	3934786	3.8	4	46	marine	normal
PRJNA554748	SAMN12283028	GCA_007489275.1	Aquimarina algiphila	Aquimarina algiphila	Aquimarina	Flavobacteriaceae	Flavobacteriales	Flavobacteriia	Bacteroidota	2047982	strain: M91	99.62	2.08	0	0.326551	6486	Scaffold	72070	6.8	1	51	marine	normal
PRJNA555480	SAMN12320082	GCA_007558725.1	Fluviicola chungangensis	Fluviicola chungangensis	Fluviicola	Crocinitomicaceae	Flavobacteriales	Flavobacteriia	Bacteroidota	2597671	strain: MAH-3	100	1.08	0	0.416862	3787	Scaffold	446546	4.2	1	34	land	normal
PRJNA555092	SAMN12292082	GCA_007785775.2	Muricauda hadalis	Muricauda hadalis	Muricauda	Flavobacteriaceae	Flavobacteriales	Flavobacteriia	Bacteroidota	2597517	strain: MT-229	99.34	1.15	0	0.4562	3682	Scaffold	246160	4	1	38	marine	normal
PRJNA255589	SAMN02927910	GCA_007830355.1	Flavobacterium tiangeerense	Flavobacterium tiangeerense	Flavobacterium	Flavobacteriaceae	Flavobacteriales	Flavobacteriia	Bacteroidota	459471	strain: CGMCC 1.6847	99.65	0.35	0	0.336292	3065	Scaffold	329560	3.4	0	46	land	extreme
PRJNA551306	SAMN12144329	GCA_007993795.1	Antarcticibacterium arcticum	Antarcticibacterium arcticum	Antarcticibacterium	Flavobacteriaceae	Flavobacteriales	Flavobacteriia	Bacteroidota	2585771	strain: PAMC 28998	98.86	0	0	0.397675	3144	Complete Genome	3409178	3.3	3	45	marine	normal
PRJNA559450	SAMN12541755	GCA_007997385.1	Seonamhaeicola algicola	Seonamhaeicola algicola	Seonamhaeicola	Flavobacteriaceae	Flavobacteriales	Flavobacteriia	Bacteroidota	1719036	strain: Gy8	99.34	0	0	0.323153	3117	Scaffold	478203	3.6	1	38	tidal flat	normal
PRJNA559457	SAMN12541851	GCA_008000935.1	Flavobacterium alkalisoli	Flavobacterium alkalisoli	Flavobacterium	Flavobacteriaceae	Flavobacteriales	Flavobacteriia	Bacteroidota	2602769	strain: XS-5	99.47	0.03	0	0.379957	3674	Complete Genome	3985855	3.9	3	46	land	normal
PRJNA557012	SAMN12386529	GCA_008033385.1	Algibacter pacificus	Algibacter pacificus	Algibacter	Flavobacteriaceae	Flavobacteriales	Flavobacteriia	Bacteroidota	2599389	strain: H164	99.34	1.86	6.25	0.332175	3479	Scaffold	321337	4.1	1	42	marine	normal
PRJNA559942	SAMN12565026	GCA_008040165.1	Flagellimonas hymeniacidonis	Flagellimonas hymeniacidonis	Flagellimonas	Flavobacteriaceae	Flavobacteriales	Flavobacteriia	Bacteroidota	2603628	strain: 176CP5-101	99.01	0.22	0	0.378259	3563	Scaffold	1257460	3.8	1	37	marine	normal
PRJNA559446	SAMN12541750	GCA_008056315.1	Seonamhaeicola maritimus	Seonamhaeicola maritimus	Seonamhaeicola	Flavobacteriaceae	Flavobacteriales	Flavobacteriia	Bacteroidota	2591822	strain: 1505	99.34	1.65	0	0.332906	3683	Scaffold	1184192	4.3	2	39	tidal flat	normal
PRJNA560125	SAMN12569072	GCA_008084905.1	Formosa maritima	Formosa maritima	Formosa	Flavobacteriaceae	Flavobacteriales	Flavobacteriia	Bacteroidota	2592046	strain: 1494	99.67	0.17	0	0.311204	2815	Scaffold	141081	3	1	36	tidal flat	normal
PRJNA559448	SAMN12541753	GCA_008085455.1	Seonamhaeicola marinus	Seonamhaeicola marinus	Seonamhaeicola	Flavobacteriaceae	Flavobacteriales	Flavobacteriia	Bacteroidota	1912246	strain: B011	100	3.18	86.96	0.333428	5076	Scaffold	303893	5	1	43	tidal flat	normal
PRJNA439988	SAMN12255867	GCA_008124875.1	Tenacibaculum adriaticum	Tenacibaculum adriaticum	Tenacibaculum	Flavobacteriaceae	Flavobacteriales	Flavobacteriia	Bacteroidota	413713	strain: DSM 18961	99.33	1.23	0	0.312062	2940	Scaffold	489473	3.2	1	38	marine	normal
PRJNA560747	SAMN12598862	GCA_008274625.1	Chryseobacterium panacisoli	Chryseobacterium panacisoli	Chryseobacterium	Weeksellaceae	Flavobacteriales	Flavobacteriia	Bacteroidota	1807141	strain: Gsoil 183	100	0.25	0	0.364488	4470	Scaffold	576644	4.9	1	76	land	normal
PRJNA563552	SAMN12676130	GCA_008369745.1	Flavobacterium nitrogenifigens	Flavobacterium nitrogenifigens	Flavobacterium	Flavobacteriaceae	Flavobacteriales	Flavobacteriia	Bacteroidota	1617283	strain: KACC 18538	99.65	0.41	0	0.342204	4632	Complete Genome	5497186	5.4	6	64	land	normal
PRJNA560745	SAMN12598843	GCA_008386505.1	Chryseobacterium sediminis	Chryseobacterium sediminis	Chryseobacterium	Weeksellaceae	Flavobacteriales	Flavobacteriia	Bacteroidota	1679494	strain: IMT-174	100	0.25	0	0.359828	4446	Scaffold	1306861	4.8	2	81	land	normal
PRJNA563987	SAMN12697401	GCA_008386635.1	Maribacter flavus	Maribacter flavus	Maribacter	Flavobacteriaceae	Flavobacteriales	Flavobacteriia	Bacteroidota	1658664	strain: KCTC 42508	99.67	0.54	0	0.418128	3791	Scaffold	766565	4.2	1	39	marine	normal
PRJNA564023	SAMN12698558	GCA_008629655.1	Flavobacterium baculatum	Flavobacterium baculatum	Flavobacterium	Flavobacteriaceae	Flavobacteriales	Flavobacteriia	Bacteroidota	2608000	strain: SNL9	99.16	0.71	0	0.344486	3223	Scaffold	223713	3.3	1	68	land	normal
PRJNA573476	SAMN12811327	GCA_008806375.1	Tamlana haliotis	Tamlana haliotis	Tamlana	Flavobacteriaceae	Flavobacteriales	Flavobacteriia	Bacteroidota	2614804	strain: B1N29	99.01	0.71	0	0.348792	2916	Scaffold	131809	3.3	1	36	land	normal
PRJNA573476	SAMN12826462	GCA_008806755.1	Tenacibaculum aiptasiae	Tenacibaculum aiptasiae	Tenacibaculum	Flavobacteriaceae	Flavobacteriales	Flavobacteriia	Bacteroidota	426481	strain: a4	99.66	1.06	0	0.301094	3697	Scaffold	185145	3.8	2	42	marine	normal
PRJNA551352	SAMN12144570	GCA_009371985.2	Pelagihabitans pacificus	Pelagihabitans pacificus	Pelagihabitans	Flavobacteriaceae	Flavobacteriales	Flavobacteriia	Bacteroidota	2696054	strain: TP-CH-4	99.67	0.66	0	0.44507	4068	Scaffold	726443	4.5	1	36	marine	normal
PRJNA512295	SAMN12228873	GCA_009674825.1	Maribacter luteus	Maribacter luteus	Maribacter	Flavobacteriaceae	Flavobacteriales	Flavobacteriia	Bacteroidota	2594478	strain: RZ05	99.34	1.51	9.09	0.389386	3949	Scaffold	423284	4.5	1	37	tidal flat	normal
PRJDB6886	SAMD00129980	GCA_009684755.1	Capnocytophaga felis	Capnocytophaga felis	Capnocytophaga	Flavobacteriaceae	Flavobacteriales	Flavobacteriia	Bacteroidota	2267611	strain: KC07070	100	0	0	0.355705	2560	Scaffold	176634	2.8	1	39	land	normal
PRJNA589482	SAMN13282306	GCA_009711055.1	Myroides pelagicus	Myroides pelagicus	Myroides	Flavobacteriaceae	Flavobacteriales	Flavobacteriia	Bacteroidota	270914	strain: SM1T	99.47	0.35	0	0.344084	2925	Scaffold	83912	3.3	1	70	tidal flat	normal
PRJNA495692	SAMN10230087	GCA_009725995.1	Zobellia laminariae	Zobellia laminariae	Zobellia	Flavobacteriaceae	Flavobacteriales	Flavobacteriia	Bacteroidota	248906	strain: KMM 3676	99.5	1.37	0	0.3677	4311	Scaffold	904812	5	1	38	tidal flat	normal
PRJNA592864	SAMN13441181	GCA_009746565.1	Mariniflexile maritimum	Mariniflexile maritimum	Mariniflexile	Flavobacteriaceae	Flavobacteriales	Flavobacteriia	Bacteroidota	2682493	strain: M5A1M	99.34	1.19	0	0.377772	3173	Scaffold	292627	3.6	1	38	marine	normal
PRJNA535371	SAMN11493986	GCA_009792295.1	Myroides fluvii	Myroides fluvii	Myroides	Flavobacteriaceae	Flavobacteriales	Flavobacteriia	Bacteroidota	2572594	strain: CJ210	99.65	1.53	0	0.364682	3290	Complete Genome	3766904	3.7	6	91	land	normal
PRJNA360649	SAMN06214045	GCA_009901525.1	Kordia antarctica	Kordia antarctica	Kordia	Flavobacteriaceae	Flavobacteriales	Flavobacteriia	Bacteroidota	1218801	strain: IMCC3317	99.92	0.71	0	0.332342	4702	Complete Genome	5500985	5.4	3	47	marine	extreme
PRJNA599453	SAMN13752078	GCA_009903685.1	Muricauda ochracea	Muricauda ochracea	Muricauda	Flavobacteriaceae	Flavobacteriales	Flavobacteriia	Bacteroidota	2696472	strain: JGD-17	99.34	0.59	12.5	0.411122	3379	Scaffold	976511	3.5	3	37	tidal flat	normal
PRJNA595662	SAMN13563978	GCA_009909615.1	Acidiluteibacter ferrifornacis	Acidiluteibacter ferrifornacis	Acidiluteibacter	Cryomorphaceae	Flavobacteriales	Flavobacteriia	Bacteroidota	2692424	strain: S-15	100	0	0	0.355942	3058	Scaffold	247842	3.4	2	32	tidal flat	normal
PRJNA599210	SAMN13741322	GCA_010500845.1	Muricauda sediminis	Muricauda sediminis	Muricauda	Flavobacteriaceae	Flavobacteriales	Flavobacteriia	Bacteroidota	2696468	strain: 40Bstr401	99.34	2.48	0	0.429309	3896	Scaffold	346112	4.1	1	37	marine	normal
PRJDB8195	SAMD00166236	GCA_010725055.1	Gelidibacter japonicus	Gelidibacter japonicus	Gelidibacter	Flavobacteriaceae	Flavobacteriales	Flavobacteriia	Bacteroidota	1962232	strain: Bio7-1	99.34	3.4	47.06	0.379802	4044	Scaffold	190347	4.6	1	39	marine	normal
PRJNA606115	SAMN14085626	GCA_010820555.1	Psychroflexus aurantiacus	Psychroflexus aurantiacus	Psychroflexus	Flavobacteriaceae	Flavobacteriales	Flavobacteriia	Bacteroidota	2709310	strain: YR1-1	99.37	0	0	0.398262	2671	Scaffold	444292	2.9	1	36	land	normal
PRJNA601280	SAMN13864727	GCA_011068285.1	Muricauda oceani	Muricauda oceani	Muricauda	Flavobacteriaceae	Flavobacteriales	Flavobacteriia	Bacteroidota	2698672	strain: 501str8	99.34	0.66	0	0.427805	4253	Complete Genome	4610330	4.5	2	39	marine	normal
PRJNA609779	SAMN14260173	GCA_011089875.1	Psychroflexus maritimus	Psychroflexus maritimus	Psychroflexus	Flavobacteriaceae	Flavobacteriales	Flavobacteriia	Bacteroidota	2714865	strain: C1	96.98	0.19	0	0.339466	2352	Scaffold	96553	2.6	1	36	tidal flat	normal
PRJNA608177	SAMN14167127	GCA_011305415.1	Flavobacterium bernardetii	Flavobacterium bernardetii	Flavobacterium	Flavobacteriaceae	Flavobacteriales	Flavobacteriia	Bacteroidota	2813823	strain: F-372	99.29	0.03	0	0.308945	3092	Scaffold	300581	3.3	1	41	land	normal
PRJNA546625	SAMN12025951	GCA_011762155.1	Wenyingzhuangia heitensis	Wenyingzhuangia heitensis	Wenyingzhuangia	Flavobacteriaceae	Flavobacteriales	Flavobacteriia	Bacteroidota	1487859	strain: DSM 101599	96.98	0.57	0	0.313999	3081	Scaffold	1935568	3.6	1	46	tidal flat	normal
PRJNA607855	SAMN14149834	GCA_011762485.1	Yeosuana marina	Yeosuana marina	Yeosuana	Flavobacteriaceae	Flavobacteriales	Flavobacteriia	Bacteroidota	1565536	strain: JLT21	99.21	0.61	0	0.325991	3782	Scaffold	338485	4.1	2	38	marine	extreme
PRJNA583511	SAMN13172207	GCA_011927765.1	Wenyingzhuangia aestuarii	Wenyingzhuangia aestuarii	Wenyingzhuangia	Flavobacteriaceae	Flavobacteriales	Flavobacteriia	Bacteroidota	1647582	strain: DSM 105044	96.98	1.58	0	0.318466	3007	Scaffold	201914	3.5	1	46	tidal flat	normal
PRJNA583301	SAMN13173772	GCA_011927795.1	Saonia flava	Saonia flava	Saonia	Flavobacteriaceae	Flavobacteriales	Flavobacteriia	Bacteroidota	523696	strain: DSM 29762	99.34	0.65	0	0.361665	3386	Scaffold	947233	3.7	1	35	tidal flat	normal
PRJNA616062	SAMN14480719	GCA_012037625.1	Tamlana crocina	Tamlana crocina	Tamlana	Flavobacteriaceae	Flavobacteriales	Flavobacteriia	Bacteroidota	393006	strain: HST1-43	99.34	3.91	16.22	0.38384	4084	Scaffold	157141	4	1	39	tidal flat	normal
PRJNA616056	SAMN14480402	GCA_012037645.1	Salinimicrobium oceani	Salinimicrobium oceani	Salinimicrobium	Flavobacteriaceae	Flavobacteriales	Flavobacteriia	Bacteroidota	2722702	strain: J15B91	99.16	3.47	53.57	0.418462	4926	Scaffold	371368	4.2	1	49	marine	normal
PRJNA231221	SAMN11056351	GCA_012273615.1	Chryseobacterium gallinarum	Chryseobacterium gallinarum	Chryseobacterium	Weeksellaceae	Flavobacteriales	Flavobacteriia	Bacteroidota	1324352	strain: FDAARGOS_636	100	0.25	0	0.370443	3775	Complete Genome	4337626	4.2	6	78	land	normal
PRJNA627030	SAMN14648850	GCA_012910715.1	Flavivirga algicola	Flavivirga algicola	Flavivirga	Flavobacteriaceae	Flavobacteriales	Flavobacteriia	Bacteroidota	2729136	strain: Y03	99.67	1.49	23.08	0.335113	4224	Scaffold	359363	4.9	4	44	tidal flat	normal
PRJNA626503	SAMN14642317	GCA_012927265.1	Chryseobacterium cheonjiense	Chryseobacterium cheonjiense	Chryseobacterium	Weeksellaceae	Flavobacteriales	Flavobacteriia	Bacteroidota	2728845	strain: RJ-7-14	100	0.49	0	0.372462	3898	Scaffold	921970	4.2	1	58	land	normal
PRJNA632166	SAMN14915977	GCA_013294015.1	Frigoriflavimonas asaccharolytica	Frigoriflavimonas asaccharolytica	Frigoriflavimonas	Weeksellaceae	Flavobacteriales	Flavobacteriia	Bacteroidota	2735899	strain: 16F	100	0.25	0	0.322578	3228	Scaffold	101569	3.4	1	35	land	extreme
PRJNA531318	SAMN11356336	GCA_013343195.3	Flavobacterium psychrophilum	Flavobacterium psychrophilum	Flavobacterium	Flavobacteriaceae	Flavobacteriales	Flavobacteriia	Bacteroidota	96345	strain: 160401-1/5N	99.29	0.44	0	0.325518	2465	Complete Genome	2827614	2.8	6	49	land	normal
PRJNA641750	SAMN15364525	GCA_013389455.1	Flavobacterium inviolabile	Flavobacterium inviolabile	Flavobacterium	Flavobacteriaceae	Flavobacteriales	Flavobacteriia	Bacteroidota	2748320	strain: P2-65	99.29	0.35	0	0.396953	3522	Complete Genome	3913347	3.8	5	65	land	normal
PRJNA630549	SAMN14839900	GCA_013394595.1	Winogradskyella forsetii	Winogradskyella forsetii	Winogradskyella	Flavobacteriaceae	Flavobacteriales	Flavobacteriia	Bacteroidota	2686077	strain: HL857	99.67	0.77	0	0.34727	3945	Complete Genome	4512651	4.4	2	38	marine	normal
PRJNA630549	SAMN14839903	GCA_013394655.1	Winogradskyella schleiferi	Winogradskyella schleiferi	Winogradskyella	Flavobacteriaceae	Flavobacteriales	Flavobacteriia	Bacteroidota	2686078	strain: Z215	99.67	0.83	0	0.34633	3995	Complete Genome	4560973	4.5	2	38	marine	normal
PRJNA630549	SAMN14839904	GCA_013394675.1	Winogradskyella helgolandensis	Winogradskyella helgolandensis	Winogradskyella	Flavobacteriaceae	Flavobacteriales	Flavobacteriia	Bacteroidota	2697010	strain: Z354	99.67	0.98	0	0.331989	3845	Complete Genome	4533039	4.4	3	44	marine	normal
PRJNA643680	SAMN15423675	GCA_013402795.1	Costertonia aggregata	Costertonia aggregata	Costertonia	Flavobacteriaceae	Flavobacteriales	Flavobacteriia	Bacteroidota	343403	strain: KCCM 42265	99.34	0.33	0	0.394437	3635	Complete Genome	3910334	3.8	3	41	marine	normal
PRJNA547874	SAMN11980259	GCA_013488205.1	Empedobacter falsenii	Empedobacter falsenii	Empedobacter	Weeksellaceae	Flavobacteriales	Flavobacteriia	Bacteroidota	343874	strain: 1681-1	100	0	0	0.315993	3459	Complete Genome	3739606	3.7	7	84	land	normal
PRJNA649444	SAMN15667085	GCA_014062315.1	Gelidibacter maritimus	Gelidibacter maritimus	Gelidibacter	Flavobacteriaceae	Flavobacteriales	Flavobacteriia	Bacteroidota	2761487	strain: F6074	99.34	1.49	0	0.377711	3981	Scaffold	271603	4.6	2	37	marine	normal
PRJNA583281	SAMN13173219	GCA_014138495.1	Flavobacterium gossypii	Flavobacterium gossypii	Flavobacterium	Flavobacteriaceae	Flavobacteriales	Flavobacteriia	Bacteroidota	1646119	strain: DSM 100397	99.65	0	0	0.388957	3416	Scaffold	746013	3.7	1	49	land	normal
PRJNA583291	SAMN13172995	GCA_014197445.1	Mesonia hippocampi	Mesonia hippocampi	Mesonia	Flavobacteriaceae	Flavobacteriales	Flavobacteriia	Bacteroidota	1628250	strain: DSM 29568	97.38	0.19	0	0.344824	2364	Scaffold	242424	2.6	2	36	land	normal
PRJNA632253	SAMN14908471	GCA_014202225.1	Algibacter amylolyticus	Algibacter amylolyticus	Algibacter	Flavobacteriaceae	Flavobacteriales	Flavobacteriia	Bacteroidota	1608400	strain: DSM 29199	99.34	0.83	0	0.334591	3571	Scaffold	294899	4.3	1	38	tidal flat	normal
PRJNA632098	SAMN14908321	GCA_014207905.1	Flavobacterium notoginsengisoli	Flavobacterium notoginsengisoli	Flavobacterium	Flavobacteriaceae	Flavobacteriales	Flavobacteriia	Bacteroidota	1478199	strain: S00128	99.65	0.5	0	0.33466	4729	Scaffold	602546	5.4	1	51	land	normal
PRJNA657123	SAMN15815794	GCA_014270105.1	Hyunsoonleella aquatilis	Hyunsoonleella aquatilis	Hyunsoonleella	Flavobacteriaceae	Flavobacteriales	Flavobacteriia	Bacteroidota	2762758	strain: SJ7	99.01	1.2	0	0.381549	3409	Scaffold	732525	3.9	1	36	land	normal
PRJNA529554	SAMN11269519	GCA_014295415.1	Constantimarinum furrinae	Constantimarinum furrinae	Constantimarinum	Flavobacteriaceae	Flavobacteriales	Flavobacteriia	Bacteroidota	2562285	strain: ALE3EI	98.86	0	0	0.403779	2718	Complete Genome	2987299	2.9	2	37	marine	normal
PRJNA658087	SAMN15857137	GCA_014305095.1	Flavobacterium kayseriense	Flavobacterium kayseriense	Flavobacterium	Flavobacteriaceae	Flavobacteriales	Flavobacteriia	Bacteroidota	2764714	strain: F-47	99.29	0.71	0	0.342972	3108	Scaffold	466183	3.5	1	44	tidal flat	normal
PRJNA658091	SAMN15857145	GCA_014305155.1	Flavobacterium muglaense	Flavobacterium muglaense	Flavobacterium	Flavobacteriaceae	Flavobacteriales	Flavobacteriia	Bacteroidota	2764716	strain: F-60	99.29	0.42	0	0.345075	3637	Scaffold	66970	4.1	1	47	land	normal
PRJNA658098	SAMN15857328	GCA_014305215.1	Flavobacterium turcicum	Flavobacterium turcicum	Flavobacterium	Flavobacteriaceae	Flavobacteriales	Flavobacteriia	Bacteroidota	2764718	strain: F-400	100	0.18	0	0.352428	2960	Scaffold	333593	3.3	1	43	tidal flat	normal
PRJNA634460	SAMN14996743	GCA_014352875.1	Polaribacter pectinis	Polaribacter pectinis	Polaribacter	Flavobacteriaceae	Flavobacteriales	Flavobacteriia	Bacteroidota	2738844	strain: L12M9	99.66	0.74	0	0.297143	3040	Complete Genome	3471153	3.4	2	38	land	normal
PRJNA650022	SAMN15691429	GCA_014524565.1	Croceimicrobium hydrocarbonivorans	Croceimicrobium hydrocarbonivorans	Croceimicrobium	Schleiferiaceae	Flavobacteriales	Flavobacteriia	Bacteroidota	2761580	strain: A20-9	100	0	0	0.432296	3601	Complete Genome	4035598	3.9	2	36	marine	normal
PRJNA662230	SAMN16078603	GCA_014596935.1	Aestuariibaculum suncheonense	Aestuariibaculum suncheonense	Aestuariibaculum	Flavobacteriaceae	Flavobacteriales	Flavobacteriia	Bacteroidota	1028745	strain: SC17	99.67	1.53	12.5	0.353408	3363	Scaffold	363180	4	1	51	tidal flat	normal
PRJNA662220	SAMN16078551	GCA_014596945.1	Aestuariibaculum sediminum	Aestuariibaculum sediminum	Aestuariibaculum	Flavobacteriaceae	Flavobacteriales	Flavobacteriia	Bacteroidota	2770637	strain: TT11	99.34	0.54	0	0.342214	3371	Scaffold	379548	4	1	48	tidal flat	normal
PRJNA662231	SAMN16078626	GCA_014596975.1	Aestuariibaculum marinum	Aestuariibaculum marinum	Aestuariibaculum	Flavobacteriaceae	Flavobacteriales	Flavobacteriia	Bacteroidota	2683592	strain: IP7	99.67	1.6	10	0.35216	3279	Scaffold	247765	3.7	1	51	marine	normal
PRJNA646415	SAMN15543002	GCA_014623485.1	Chryseobacterium manosquense	Chryseobacterium manosquense	Chryseobacterium	Weeksellaceae	Flavobacteriales	Flavobacteriia	Bacteroidota	2754694	strain: Marseille-Q2069	100	1.1	33.33	0.369213	2800	Chromosome	2618392	2.9	4	42	land	normal
PRJDB10509	SAMD00244916	GCA_014636335.1	Hyunsoonleella pacifica	Hyunsoonleella pacifica	Hyunsoonleella	Flavobacteriaceae	Flavobacteriales	Flavobacteriia	Bacteroidota	1080224	strain: CGMCC 1.11009	99.34	0.66	0	0.326988	3514	Scaffold	690238	4	1	44	marine	normal
PRJDB10509	SAMD00244948	GCA_014638005.1	Flavobacterium orientale	Flavobacterium orientale	Flavobacterium	Flavobacteriaceae	Flavobacteriales	Flavobacteriia	Bacteroidota	1756020	strain: CGMCC 1.12506	99.65	0.29	50	0.34681	2901	Scaffold	221254	3.2	1	41	land	normal
PRJDB10509	SAMD00244950	GCA_014638095.1	Muriicola marianensis	Muriicola marianensis	Muriicola	Flavobacteriaceae	Flavobacteriales	Flavobacteriia	Bacteroidota	1324801	strain: CGMCC 1.12606	99.01	0.18	0	0.481677	2747	Scaffold	945876	3	1	38	marine	normal
PRJDB10509	SAMD00244987	GCA_014640175.1	Psychroflexus salis	Psychroflexus salis	Psychroflexus	Flavobacteriaceae	Flavobacteriales	Flavobacteriia	Bacteroidota	1526574	strain: CGMCC 1.12925	99.49	0.13	0	0.328381	2569	Scaffold	194614	2.8	1	33	land	extreme
PRJDB10509	SAMD00244989	GCA_014640195.1	Psychroflexus planctonicus	Psychroflexus planctonicus	Psychroflexus	Flavobacteriaceae	Flavobacteriales	Flavobacteriia	Bacteroidota	1526575	strain: CGMCC 1.12931	99.49	0.19	0	0.3404	2707	Scaffold	269869	3.1	1	34	land	normal
PRJDB10509	SAMD00245036	GCA_014641635.1	Aquaticitalea lipolytica	Aquaticitalea lipolytica	Aquaticitalea	Flavobacteriaceae	Flavobacteriales	Flavobacteriia	Bacteroidota	1247562	strain: CGMCC 1.15295	99.67	0.17	0	0.314289	2894	Scaffold	441457	3.1	1	35	marine	normal
PRJDB10509	SAMD00245048	GCA_014642275.1	Flavobacterium lutivivi	Flavobacterium lutivivi	Flavobacterium	Flavobacteriaceae	Flavobacteriales	Flavobacteriia	Bacteroidota	1677894	strain: CGMCC 1.15347	98.94	0	0	0.323957	2555	Scaffold	256309	2.8	1	37	land	normal
PRJDB10509	SAMD00245083	GCA_014643615.1	Croceivirga lutea	Croceivirga lutea	Croceivirga	Flavobacteriaceae	Flavobacteriales	Flavobacteriia	Bacteroidota	1775167	strain: CGMCC 1.15761	99.01	0	0	0.350929	3042	Scaffold	767445	3.4	1	34	tidal flat	normal
PRJDB10509	SAMD00245085	GCA_014643655.1	Polaribacter pacificus	Polaribacter pacificus	Polaribacter	Flavobacteriaceae	Flavobacteriales	Flavobacteriia	Bacteroidota	1775173	strain: CGMCC 1.15763	99.3	0.17	0	0.34301	2466	Scaffold	548824	2.7	2	38	marine	normal
PRJDB10509	SAMD00245154	GCA_014645495.1	Cloacibacterium rupense	Cloacibacterium rupense	Cloacibacterium	Weeksellaceae	Flavobacteriales	Flavobacteriia	Bacteroidota	517423	strain: CGMCC 1.7656	100	0.25	0	0.32875	2815	Scaffold	291985	3.1	1	37	land	normal
PRJDB10510	SAMD00245229	GCA_014646655.1	Yeosuana aromativorans	Yeosuana aromativorans	Yeosuana	Flavobacteriaceae	Flavobacteriales	Flavobacteriia	Bacteroidota	288019	strain: JCM 12862	98.88	0.07	0	0.353731	3377	Scaffold	280729	3.7	1	38	tidal flat	normal
PRJDB10510	SAMD00245230	GCA_014646675.1	Lutibacter litoralis	Lutibacter litoralis	Lutibacter	Flavobacteriaceae	Flavobacteriales	Flavobacteriia	Bacteroidota	321268	strain: JCM 13034	98.32	1.23	0	0.301319	3126	Scaffold	246859	3.5	1	37	tidal flat	normal
PRJDB10508	SAMD00245560	GCA_014651355.1	Aquimarina muelleri	Aquimarina muelleri	Aquimarina	Flavobacteriaceae	Flavobacteriales	Flavobacteriia	Bacteroidota	279356	strain: KCTC 12285	99.62	0	0	0.31408	4127	Scaffold	131573	4.8	1	39	marine	normal
PRJDB10508	SAMD00245567	GCA_014651475.1	Mesonia mobilis	Mesonia mobilis	Mesonia	Flavobacteriaceae	Flavobacteriales	Flavobacteriia	Bacteroidota	369791	strain: KCTC 12708	99.62	0	0	0.351005	2964	Scaffold	359371	3.2	3	37	marine	normal
PRJNA663281	SAMN16131505	GCA_014764305.1	Mesoflavibacter profundi	Mesoflavibacter profundi	Mesoflavibacter	Flavobacteriaceae	Flavobacteriales	Flavobacteriia	Bacteroidota	2708110	strain: YC1039	99.67	0	0	0.311531	2760	Complete Genome	3088198	3	2	37	marine	normal
PRJNA658830	SAMN15890316	GCA_014784055.1	Polaribacter haliotis	Polaribacter haliotis	Polaribacter	Flavobacteriaceae	Flavobacteriales	Flavobacteriia	Bacteroidota	1888915	strain: KCTC 52418	99.66	0.34	0	0.299431	3234	Complete Genome	3800626	3.7	2	38	land	normal
PRJNA543206	SAMN15803234	GCA_014837035.1	Kaistella pullorum	Kaistella pullorum	Kaistella	Weeksellaceae	Flavobacteriales	Flavobacteriia	Bacteroidota	2763074	strain: Sa1CVA4	100	0	0	0.429466	2356	Scaffold	439153	2.5	1	39	land	normal
PRJNA662828	SAMN16095158	GCA_014837145.1	Chryseobacterium caseinilyticum	Chryseobacterium caseinilyticum	Chryseobacterium	Weeksellaceae	Flavobacteriales	Flavobacteriia	Bacteroidota	2771428	strain: GCR10	100	0.49	0	0.365221	3981	Scaffold	286484	4.2	1	58	land	normal
PRJNA598450	SAMN15043856	GCA_014844295.1	Flavobacterium columnare	Flavobacterium columnare	Flavobacterium	Flavobacteriaceae	Flavobacteriales	Flavobacteriia	Bacteroidota	996	strain: F2S17	99.65	0	0	0.316761	2772	Complete Genome	3221278	3.2	11	88	land	normal
PRJNA668829	SAMN16424887	GCA_014961145.1	Cruoricaptor ignavus	Cruoricaptor ignavus	Cruoricaptor	Weeksellaceae	Flavobacteriales	Flavobacteriia	Bacteroidota	1118202	strain: M1214	100	0	0	0.452161	2037	Complete Genome	2120336	2.1	2	39	land	normal
PRJNA669111	SAMN16434554	GCA_015234135.1	Faecalibacter rhinopitheci	Faecalibacter rhinopitheci	Faecalibacter	Weeksellaceae	Flavobacteriales	Flavobacteriia	Bacteroidota	2779678	strain: WQ 117	100	0	0	0.305413	2684	Scaffold	306342	2.8	1	87	land	normal
PRJNA672265	SAMN16561886	GCA_015330165.1	Zobellia roscoffensis	Zobellia roscoffensis	Zobellia	Flavobacteriaceae	Flavobacteriales	Flavobacteriia	Bacteroidota	2779508	strain: Asnod1-F08	99.67	0.99	0	0.375569	4055	Scaffold	4613932	4.9	1	36	marine	normal
PRJNA674463	SAMN16657555	GCA_015476115.1	Aegicerativicinus sediminis	Aegicerativicinus sediminis	Aegicerativicinus	Flavobacteriaceae	Flavobacteriales	Flavobacteriia	Bacteroidota	2893202	strain: SM2-F	99.34	0.66	0	0.359885	3540	Complete Genome	4094245	4	2	37	tidal flat	normal
PRJNA679130	SAMN16824282	GCA_015767265.1	Aureivirga marina	Aureivirga marina	Aureivirga	Flavobacteriaceae	Flavobacteriales	Flavobacteriia	Bacteroidota	1182451	strain: LMG 26721	97.42	1.57	0	0.284315	3483	Scaffold	403723	3.8	1	69	marine	normal
PRJNA682546	SAMN16996246	GCA_016236975.1	Salegentibacter maritimus	Salegentibacter maritimus	Salegentibacter	Flavobacteriaceae	Flavobacteriales	Flavobacteriia	Bacteroidota	2794347	strain: F60176	99.43	0.57	0	0.365337	3153	Scaffold	194058	3.5	1	45	tidal flat	normal
PRJNA687147	SAMN17109601	GCA_016428595.1	Snuella sedimenti	Snuella sedimenti	Snuella	Flavobacteriaceae	Flavobacteriales	Flavobacteriia	Bacteroidota	2798802	strain: CAU 1569	99.23	1.48	14.29	0.357303	3534	Scaffold	146655	4.3	1	43	marine	normal
PRJNA688791	SAMN17189337	GCA_016595215.1	Chryseobacterium paridis	Chryseobacterium paridis	Chryseobacterium	Weeksellaceae	Flavobacteriales	Flavobacteriia	Bacteroidota	2800328	strain: YIM B02567	100	0.49	0	0.345014	4241	Scaffold	1086146	4.7	1	63	land	normal
PRJNA231221	SAMN16357200	GCA_016599835.1	Elizabethkingia bruuniana	Elizabethkingia bruuniana	Elizabethkingia	Weeksellaceae	Flavobacteriales	Flavobacteriia	Bacteroidota	1756149	strain: FDAARGOS_1031	100	0	0	0.359081	4347	Complete Genome	4632013	4.5	5	53	land	normal
PRJNA685987	SAMN17103326	GCA_016745235.1	Chryseobacterium endalhagicum	Chryseobacterium endalhagicum	Chryseobacterium	Weeksellaceae	Flavobacteriales	Flavobacteriia	Bacteroidota	2797638	strain: L7	99.93	0.25	0	0.385837	4356	Scaffold	1214495	4.8	1	71	land	normal
PRJNA692781	SAMN17370050	GCA_016757735.1	Aequorivita iocasae	Aequorivita iocasae	Aequorivita	Flavobacteriaceae	Flavobacteriales	Flavobacteriia	Bacteroidota	2803865	strain: KX20305	99.24	0.38	0	0.387143	3092	Complete Genome	3353883	3.3	2	37	marine	normal
PRJNA674761	SAMN16674682	GCA_016786255.1	Robertkochia sediminum	Robertkochia sediminum	Robertkochia	Flavobacteriaceae	Flavobacteriales	Flavobacteriia	Bacteroidota	2785326	strain: 1368	98.68	1.86	0	0.457378	3087	Scaffold	209910	3.5	1	43	tidal flat	normal
PRJNA698300	SAMN17711753	GCA_016811105.1	Aurantibacter crassamenti	Aurantibacter crassamenti	Aurantibacter	Flavobacteriaceae	Flavobacteriales	Flavobacteriia	Bacteroidota	1837375	strain: HG732	99.01	0.61	0	0.34362	3814	Scaffold	1488220	4.4	2	37	marine	normal
PRJNA680895	SAMN16925939	GCA_016827595.1	Luteirhabdus pelagi	Luteirhabdus pelagi	Luteirhabdus	Flavobacteriaceae	Flavobacteriales	Flavobacteriia	Bacteroidota	2792783	strain: A3-108	99.24	0.27	0	0.41024	3125	Scaffold	358351	3.3	1	36	marine	normal
PRJNA706591	SAMN18138914	GCA_017313275.1	Muricauda profundi	Muricauda profundi	Muricauda	Flavobacteriaceae	Flavobacteriales	Flavobacteriia	Bacteroidota	2915620	strain: BC31-3-A3	99.67	0.75	0	0.41599	3679	Scaffold	558801	3.9	3	38	marine	normal
PRJNA706594	SAMN18138839	GCA_017313785.1	Muricauda aurea	Muricauda aurea	Muricauda	Flavobacteriaceae	Flavobacteriales	Flavobacteriia	Bacteroidota	2915619	strain: BC31-1-A7	99.34	1.21	14.29	0.420754	4071	Scaffold	297230	4.4	1	37	marine	normal
PRJNA678113	SAMN18133624	GCA_017352115.1	Flavobacterium endoglycinae	Flavobacterium endoglycinae	Flavobacterium	Flavobacteriaceae	Flavobacteriales	Flavobacteriia	Bacteroidota	2816357	strain: BB8	99.65	0.67	0	0.343032	4712	Complete Genome	5513159	5.4	5	66	land	normal
PRJNA693143	SAMN17673852	GCA_017498485.1	Polaribacter batillariae	Polaribacter batillariae	Polaribacter	Flavobacteriaceae	Flavobacteriales	Flavobacteriia	Bacteroidota	2808900	strain: G4M1	99.6	0.34	0	0.310259	3436	Complete Genome	3890129	3.8	2	37	land	normal
PRJNA714882	SAMN18319855	GCA_017565765.1	Capnocytophaga bilenii	Capnocytophaga bilenii	Capnocytophaga	Flavobacteriaceae	Flavobacteriales	Flavobacteriia	Bacteroidota	2819369	strain: Marseille-Q4570	99.52	0.71	0	0.384501	2497	Scaffold	257395	2.7	2	41	land	normal
PRJNA713986	SAMN18276999	GCA_017569185.1	Polaribacter cellanae	Polaribacter cellanae	Polaribacter	Flavobacteriaceae	Flavobacteriales	Flavobacteriia	Bacteroidota	2818493	strain: SM13	99.5	1.34	0	0.303749	3669	Complete Genome	4143164	4.1	2	40	land	normal
PRJNA719023	SAMN18581224	GCA_017814435.1	Mariniflexile gromovii	Mariniflexile gromovii	Mariniflexile	Flavobacteriaceae	Flavobacteriales	Flavobacteriia	Bacteroidota	362523	strain: KCTC 12570	99.67	2.68	0	0.338604	3784	Scaffold	177381	4.2	1	37	marine	normal
PRJNA720210	SAMN18642564	GCA_017948305.1	Faecalibacter bovis	Faecalibacter bovis	Faecalibacter	Weeksellaceae	Flavobacteriales	Flavobacteriia	Bacteroidota	2898187	strain: ZY171143	100	0	0	0.311079	2634	Complete Genome	2835235	2.8	9	95	land	normal
PRJNA714194	SAMN18291918	GCA_017948595.1	Flavobacterium geliluteum	Flavobacterium geliluteum	Flavobacterium	Flavobacteriaceae	Flavobacteriales	Flavobacteriia	Bacteroidota	2816120	strain: P7388	99.65	0.05	0	0.344508	3866	Scaffold	115517	4.3	1	45	land	extreme
PRJNA713758	SAMN18262075	GCA_017948675.1	Flavobacterium flabelliforme	Flavobacterium flabelliforme	Flavobacterium	Flavobacteriaceae	Flavobacteriales	Flavobacteriia	Bacteroidota	2816119	strain: P4023	99.29	0.03	0	0.319449	3163	Scaffold	542938	3.6	1	48	land	extreme
PRJNA727812	SAMN19040472	GCA_018380615.1	Flavobacterium psychroterrae	Flavobacterium psychroterrae	Flavobacterium	Flavobacteriaceae	Flavobacteriales	Flavobacteriia	Bacteroidota	2133767	strain: CCM 8827	99.65	0.87	0	0.332643	5083	Scaffold	190479	5.6	1	52	land	extreme
PRJNA727823	SAMN19043044	GCA_018383905.1	Flavobacterium branchiicola	Flavobacterium branchiicola	Flavobacterium	Flavobacteriaceae	Flavobacteriales	Flavobacteriia	Bacteroidota	1114875	strain: CCM 9061	99.65	0.93	20	0.337023	4553	Scaffold	576916	5.3	1	62	land	normal
PRJNA734971	SAMN19552380	GCA_018863395.1	Sinomicrobium weinanense	Sinomicrobium weinanense	Sinomicrobium	Flavobacteriaceae	Flavobacteriales	Flavobacteriia	Bacteroidota	2842200	strain: FJxs	99.34	1.96	0	0.451846	4452	Scaffold	647760	5.2	1	43	land	extreme
PRJNA739148	SAMN19774314	GCA_019038595.1	Kaistella soli	Kaistella soli	Kaistella	Weeksellaceae	Flavobacteriales	Flavobacteriia	Bacteroidota	2849654	strain: DKR-2	100	0.49	0	0.394656	2807	Scaffold	530191	3	1	39	land	normal
PRJNA598747	SAMN13715485	GCA_019308285.1	Flavobacterium quisquiliarum	Flavobacterium quisquiliarum	Flavobacterium	Flavobacteriaceae	Flavobacteriales	Flavobacteriia	Bacteroidota	1834436	strain: EA-12	99.65	2.38	41.38	0.33943	5229	Scaffold	277708	6	1	51	land	normal
PRJNA746003	SAMN20157207	GCA_019312585.1	Halomarinibacterium sedimenti	Halomarinibacterium sedimenti	Halomarinibacterium	Flavobacteriaceae	Flavobacteriales	Flavobacteriia	Bacteroidota	2857106	strain: CAU 1614	99.11	0	0	0.359974	2709	Scaffold	580342	2.9	1	35	marine	normal
PRJNA745539	SAMN20169007	GCA_019351435.1	Flavobacterium taihuense	Flavobacterium taihuense	Flavobacterium	Flavobacteriaceae	Flavobacteriales	Flavobacteriia	Bacteroidota	2857508	strain: NAS39	99.29	0.61	0	0.341354	4141	Scaffold	154719	4.6	1	47	land	normal
PRJNA660554	SAMN18395773	GCA_019552185.1	Riemerella anatipestifer	Riemerella anatipestifer	Riemerella	Weeksellaceae	Flavobacteriales	Flavobacteriia	Bacteroidota	34085	strain: 20190403E1-1	100	0	0	0.350084	2033	Complete Genome	2070944	2.2	3	40	land	normal
PRJNA749485	SAMN20371526	GCA_019613795.1	Flavobacterium litorale	Flavobacterium litorale	Flavobacterium	Flavobacteriaceae	Flavobacteriales	Flavobacteriia	Bacteroidota	2856519	strain: WSW3-B6	99.29	0.82	0	0.371211	2459	Complete Genome	2725095	2.7	3	43	marine	normal
PRJNA761013	SAMN21240475	GCA_019968605.1	Polaribacter litorisediminis	Polaribacter litorisediminis	Polaribacter	Flavobacteriaceae	Flavobacteriales	Flavobacteriia	Bacteroidota	1908341	strain: OITF-11	99.16	0.84	0	0.31266	3717	Complete Genome	4339639	4.2	3	40	tidal flat	normal
PRJNA715600	SAMN18353996	GCA_020084865.1	Candidatus Kaistella beijingensis	Candidatus Kaistella beijingensis	Kaistella	Weeksellaceae	Flavobacteriales	Flavobacteriia	Bacteroidota	2820270	strain: PM-38	100	0.25	0	0.367788	2616	Complete Genome	2816191	2.8	2	38	land	normal
PRJNA575502	SAMN21033598	GCA_020164485.1	Salegentibacter tibetensis	Salegentibacter tibetensis	Salegentibacter	Flavobacteriaceae	Flavobacteriales	Flavobacteriia	Bacteroidota	2873600	strain: JZCK2	99.43	0.38	0	0.377578	3847	Scaffold	99576	4.1	1	42	land	extreme
PRJNA575502	SAMN21423981	GCA_020164495.1	Psychroflexus lacisalsi	Psychroflexus lacisalsi	Psychroflexus	Flavobacteriaceae	Flavobacteriales	Flavobacteriia	Bacteroidota	503928	strain: KACC 14089	99.37	0.03	0	0.355656	2760	Scaffold	1560201	3	1	36	land	extreme
PRJNA575502	SAMN21033597	GCA_020164555.1	Salegentibacter lacus	Salegentibacter lacus	Salegentibacter	Flavobacteriaceae	Flavobacteriales	Flavobacteriia	Bacteroidota	2873599	strain: LM13S	99.43	0.85	0	0.369776	3657	Scaffold	180911	4	1	43	land	extreme
PRJNA766795	SAMN21876533	GCA_020310005.1	Salegentibacter mishustinae	Salegentibacter mishustinae	Salegentibacter	Flavobacteriaceae	Flavobacteriales	Flavobacteriia	Bacteroidota	270918	strain: F1	99.43	0.7	0	0.368948	3443	Complete Genome	3807780	3.7	3	45	marine	normal
PRJNA766805	SAMN21876824	GCA_020310025.1	Leeuwenhoekiella palythoae	Leeuwenhoekiella palythoae	Leeuwenhoekiella	Flavobacteriaceae	Flavobacteriales	Flavobacteriia	Bacteroidota	573501	strain: F5	99.62	0.63	0	0.399199	3410	Complete Genome	3994766	3.9	3	40	tidal flat	normal
PRJNA777039	SAMN22830951	GCA_020805785.1	Flavobacterium chungbukense	Flavobacterium chungbukense	Flavobacterium	Flavobacteriaceae	Flavobacteriales	Flavobacteriia	Bacteroidota	877464	strain: CS100	99.65	0.4	0	0.33484	4538	Scaffold	583631	5.2	1	53	land	normal
PRJNA719258	SAMN18593151	GCA_020872015.1	Chryseobacterium arthrosphaerae	Chryseobacterium arthrosphaerae	Chryseobacterium	Weeksellaceae	Flavobacteriales	Flavobacteriia	Bacteroidota	651561	strain: LMY	100	0	0	0.379209	4866	Complete Genome	5447405	5.3	6	91	land	normal
PRJNA776970	SAMN22826123	GCA_020985365.1	Chryseobacterium faecale	Chryseobacterium faecale	Chryseobacterium	Weeksellaceae	Flavobacteriales	Flavobacteriia	Bacteroidota	2852098	strain: F4	100	0.98	0	0.396846	2472	Complete Genome	2658494	2.6	1	39	land	normal
PRJNA744413	SAMN20090210	GCA_021032705.1	Psychroserpens luteolus	Psychroserpens luteolus	Psychroserpens	Flavobacteriaceae	Flavobacteriales	Flavobacteriia	Bacteroidota	2855840	strain: XSD401	99.67	0.77	0	0.339072	3518	Scaffold	706489	3.8	1	50	land	normal
PRJNA780674	SAMN23175391	GCA_021172145.1	Flavobacterium cyclinae	Flavobacterium cyclinae	Flavobacterium	Flavobacteriaceae	Flavobacteriales	Flavobacteriia	Bacteroidota	2895947	strain: KSM-R2A25	99.65	0.29	50	0.317431	2715	Complete Genome	3017062	3	3	47	land	normal
PRJNA780741	SAMN23176040	GCA_021172165.1	Flavobacterium channae	Flavobacterium channae	Flavobacterium	Flavobacteriaceae	Flavobacteriales	Flavobacteriia	Bacteroidota	2897181	strain: KSM-R2A30	99.29	0	0	0.319039	2592	Complete Genome	2808467	2.8	3	45	land	normal
PRJNA786649	SAMN23709601	GCA_021183825.1	Sinomicrobium kalidii	Sinomicrobium kalidii	Sinomicrobium	Flavobacteriaceae	Flavobacteriales	Flavobacteriia	Bacteroidota	2900738	strain: HD2P242	99.32	2.4	15.38	0.451709	4392	Complete Genome	5364211	5.2	3	48	land	normal
PRJNA777885	SAMN22889029	GCA_021205935.1	Tenacibaculum finnmarkense genomovar ulcerans	Tenacibaculum finnmarkense	Tenacibaculum	Flavobacteriaceae	Flavobacteriales	Flavobacteriia	Bacteroidota	2781388	strain: NVIB-3865	99.11	0.34	0	0.309301	2544	Scaffold	365686	2.9	2	47	land	normal
PRJNA788190	SAMN23929719	GCA_021245985.1	Flavobacterium soyae	Flavobacterium soyae	Flavobacterium	Flavobacteriaceae	Flavobacteriales	Flavobacteriia	Bacteroidota	2903098	strain: SCIV07	99.65	1.06	0	0.337192	4319	Scaffold	254525	5.1	1	54	land	normal
PRJNA649451	SAMN15667277	GCA_021278965.1	Chryseobacterium capnotolerans	Chryseobacterium capnotolerans	Chryseobacterium	Weeksellaceae	Flavobacteriales	Flavobacteriia	Bacteroidota	2759528	isolate: DH-B6	97.3	0.25	0	0.355056	5282	Complete Genome	5357258	5.2	7	99	land	normal
PRJNA789706	SAMN24146880	GCA_021311115.1	Chryseobacterium gwangjuense	Chryseobacterium gwangjuense	Chryseobacterium	Weeksellaceae	Flavobacteriales	Flavobacteriia	Bacteroidota	1069980	strain: THG-A18	100	0	0	0.344119	3180	Scaffold	438393	3.4	1	56	land	normal
PRJNA776342	SAMN22787104	GCA_021390715.1	Tenacibaculum piscium	Tenacibaculum piscium	Tenacibaculum	Flavobacteriaceae	Flavobacteriales	Flavobacteriia	Bacteroidota	1458515	strain: RT-G24	98.94	0.34	0	0.305965	2302	Scaffold	285348	2.6	5	57	land	normal
PRJNA798883	SAMN25131779	GCA_021650975.2	Flavobacterium jumunjinense	Flavobacterium jumunjinense	Flavobacterium	Flavobacteriaceae	Flavobacteriales	Flavobacteriia	Bacteroidota	998845	strain: HME7102	99.65	0.59	0	0.304715	4254	Complete Genome	4671850	4.6	6	75	land	extreme
PRJNA800002	SAMN25221629	GCA_021728415.1	Sabulilitoribacter multivorans	Sabulilitoribacter multivorans	Sabulilitoribacter	Flavobacteriaceae	Flavobacteriales	Flavobacteriia	Bacteroidota	1304750	strain: M-M16	99.67	0.33	0	0.327876	2920	Scaffold	353876	3.2	1	38	tidal flat	normal
PRJNA799998	SAMN25221484	GCA_021728535.1	Sabulilitoribacter arenilitoris	Sabulilitoribacter arenilitoris	Sabulilitoribacter	Flavobacteriaceae	Flavobacteriales	Flavobacteriia	Bacteroidota	2044858	strain: HMF6543	98.68	0.83	25	0.32003	3049	Scaffold	204683	3.4	1	34	tidal flat	normal
PRJNA792060	SAMN24375690	GCA_022399565.1	Flavobacterium algicola	Flavobacterium algicola	Flavobacterium	Flavobacteriaceae	Flavobacteriales	Flavobacteriia	Bacteroidota	556529	strain: MBE-1	98.59	0.74	0	0.340552	3454	Scaffold	857325	4.2	0	45	marine	normal
PRJNA788748	SAMN26288003	GCA_022489035.1	Gramella lutea	Gramella lutea	Gramella	Flavobacteriaceae	Flavobacteriales	Flavobacteriia	Bacteroidota	1607951	strain: YJ019	99.62	0.57	0	0.382614	3188	Scaffold	639985	3.4	1	41	tidal flat	normal
PRJNA818107	SAMN26816378	GCA_022760175.1	Zhouia spongiae	Zhouia spongiae	Zhouia	Flavobacteriaceae	Flavobacteriales	Flavobacteriia	Bacteroidota	2202721	strain: HN-Y44	99.33	0.5	0	0.384393	3391	Complete Genome	4040482	4	3	47	marine	normal
PRJNA818105	SAMN26816356	GCA_022807975.1	Abyssalbus ytuae	Abyssalbus ytuae	Abyssalbus	Flavobacteriaceae	Flavobacteriales	Flavobacteriia	Bacteroidota	2926907	strain: MT3330	98.68	1.41	0	0.352179	3695	Complete Genome	4365036	4.3	3	43	marine	normal
PRJNA791786	SAMN24341556	GCA_023008245.1	Flavobacterium sediminilitoris	Flavobacterium sediminilitoris	Flavobacterium	Flavobacteriaceae	Flavobacteriales	Flavobacteriia	Bacteroidota	2024526	strain: YSM-43	99.65	0	0	0.293804	3576	Complete Genome	3913692	3.8	3	50	tidal flat	normal
PRJNA830349	SAMN27690462	GCA_023195755.1	Chryseobacterium nepalense	Chryseobacterium nepalense	Chryseobacterium	Weeksellaceae	Flavobacteriales	Flavobacteriia	Bacteroidota	1854498	strain: AC3	100	0.49	0	0.369214	3579	Complete Genome	3989211	3.9	5	63	land	normal
PRJNA841491	SAMN28613650	GCA_023634845.1	Flavobacterium amniphilum	Flavobacterium amniphilum	Flavobacterium	Flavobacteriaceae	Flavobacteriales	Flavobacteriia	Bacteroidota	1834035	strain: KYPY10	99.65	4.95	100	0.365248	3941	Scaffold	226490	4.2	1	49	land	normal
PRJNA842869	SAMN28689404	GCA_023656565.1	Flavobacterium tyrosinilyticum	Flavobacterium tyrosinilyticum	Flavobacterium	Flavobacteriaceae	Flavobacteriales	Flavobacteriia	Bacteroidota	1658740	strain: KCTC 42726	99.65	0.05	0	0.337329	4540	Scaffold	955521	5.2	1	63	land	normal
PRJNA855445	SAMN29492048	GCA_024499525.1	Flavobacterium panici	Flavobacterium panici	Flavobacterium	Flavobacteriaceae	Flavobacteriales	Flavobacteriia	Bacteroidota	2654843	strain: BSSL-CR3	99.65	1.61	0	0.338413	4983	Complete Genome	5972859	5.8	5	65	land	normal
PRJNA837367	SAMN30281884	GCA_024722315.1	Myroides albus	Myroides albus	Myroides	Flavobacteriaceae	Flavobacteriales	Flavobacteriia	Bacteroidota	2562892	strain: P34	99.65	0.65	60	0.34108	3320	Complete Genome	3701500	3.7	9	108	land	normal
PRJNA877611	SAMN30712836	GCA_025215075.1	Tenacibaculum haliotis	Tenacibaculum haliotis	Tenacibaculum	Flavobacteriaceae	Flavobacteriales	Flavobacteriia	Bacteroidota	1888914	strain: KCTC 52419	98.83	0.17	0	0.3069	2755	Scaffold	332448	2.9	1	48	land	normal
PRJEB12549	SAMN03992719	GCA_900018365.1	Apibacter mensalis	Apibacter mensalis	Apibacter	Weeksellaceae	Flavobacteriales	Flavobacteriia	Bacteroidota	1586267	strain: R-53146	100	0	0	0.304791	2121	Scaffold	158456	2.3	2	38	land	normal
PRJEB13113	SAMEA3904576	GCA_900078205.2	Chryseobacterium timonianum	Chryseobacterium timonianum	Chryseobacterium	Weeksellaceae	Flavobacteriales	Flavobacteriia	Bacteroidota	1805473	strain: G972	100	0.25	0	0.355063	4868	Scaffold	3719575	5.3	1	83	land	normal
PRJEB14257	SAMEA4022020	GCA_900089075.1	Vaginella massiliensis	Vaginella massiliensis	Vaginella	Flavobacteriaceae	Flavobacteriales	Flavobacteriia	Bacteroidota	1816680	strain: Marseille-P2517	100	0	0	0.381567	2335	Scaffold	908173	2.4	4	59	land	normal
PRJEB15942	SAMN05421818	GCA_900099675.1	Myroides phaeus	Myroides phaeus	Myroides	Flavobacteriaceae	Flavobacteriales	Flavobacteriia	Bacteroidota	702745	strain: DSM 23313	99.65	0	0	0.332013	2565	Scaffold	115267	2.9	1	87	land	normal
PRJEB15916	SAMN04488027	GCA_900099815.1	Psychroflexus sediminis	Psychroflexus sediminis	Psychroflexus	Flavobacteriaceae	Flavobacteriales	Flavobacteriia	Bacteroidota	470826	strain: DSM 19803	99.37	0	0	0.38487	2681	Scaffold	181445	2.9	1	34	land	extreme
PRJEB15921	SAMN04488062	GCA_900099915.1	Flavobacterium omnivorum	Flavobacterium omnivorum	Flavobacterium	Flavobacteriaceae	Flavobacteriales	Flavobacteriia	Bacteroidota	178355	strain: CGMCC 1.2747	98.94	0	0	0.342801	3313	Scaffold	168100	3.7	0	43	land	normal
PRJEB15919	SAMN04489796	GCA_900099995.1	Winogradskyella thalassocola	Winogradskyella thalassocola	Winogradskyella	Flavobacteriaceae	Flavobacteriales	Flavobacteriia	Bacteroidota	262004	strain: DSM 15363	99.67	0.75	0	0.332833	3963	Scaffold	333368	4.5	2	43	tidal flat	normal
PRJEB15966	SAMN05421542	GCA_900100075.1	Chryseobacterium jejuense	Chryseobacterium jejuense	Chryseobacterium	Weeksellaceae	Flavobacteriales	Flavobacteriia	Bacteroidota	445960	strain: DSM 19299	100	0.65	0	0.353212	4590	Scaffold	642374	5	1	81	land	normal
PRJEB15983	SAMN05192550	GCA_900100165.1	Flavobacterium glycines	Flavobacterium glycines	Flavobacterium	Flavobacteriaceae	Flavobacteriales	Flavobacteriia	Bacteroidota	551990	strain: Gm-149	99.65	0.9	0	0.34111	3234	Scaffold	2097855	3.9	1	50	land	normal
PRJEB15997	SAMN04487935	GCA_900100375.1	Flavobacterium noncentrifugens	Flavobacterium noncentrifugens	Flavobacterium	Flavobacteriaceae	Flavobacteriales	Flavobacteriia	Bacteroidota	1128970	strain: CGMCC 1.10076	99.65	0	0	0.407621	3620	Scaffold	512695	3.9	1	41	land	extreme
PRJEB16037	SAMN02927925	GCA_900100625.1	Flavobacterium saliperosum	Flavobacterium saliperosum	Flavobacterium	Flavobacteriaceae	Flavobacteriales	Flavobacteriia	Bacteroidota	329186	strain: CGMCC 1.3801	99.65	0.06	0	0.39603	2690	Scaffold	334497	2.8	1	44	land	normal
PRJEB15789	SAMN05421636	GCA_900101815.1	Pricia antarctica	Pricia antarctica	Pricia	Flavobacteriaceae	Flavobacteriales	Flavobacteriia	Bacteroidota	641691	strain: DSM 23421	98.9	0.88	0	0.437864	4185	Scaffold	450975	4.7	1	36	tidal flat	extreme
PRJEB15790	SAMN02927903	GCA_900101895.1	Flavobacterium caeni	Flavobacterium caeni	Flavobacterium	Flavobacteriaceae	Flavobacteriales	Flavobacteriia	Bacteroidota	490189	strain: CGMCC 1.7031	99.28	0	0	0.490215	3248	Scaffold	170303	3.6	2	40	land	normal
PRJEB15796	SAMN05421544	GCA_900101995.1	Riemerella columbipharyngis	Riemerella columbipharyngis	Riemerella	Weeksellaceae	Flavobacteriales	Flavobacteriia	Bacteroidota	1071918	strain: DSM 24015	98.53	0	0	0.365763	2135	Scaffold	92396	2.1	1	37	land	normal
PRJEB16114	SAMN04488140	GCA_900102915.1	Salinimicrobium catena	Salinimicrobium catena	Salinimicrobium	Flavobacteriaceae	Flavobacteriales	Flavobacteriia	Bacteroidota	390640	strain: CGMCC 1.6101	99.62	0.62	0	0.437722	2985	Scaffold	322405	3.2	0	40	marine	normal
PRJEB16171	SAMN04488514	GCA_900103215.1	Kriegella aquimaris	Kriegella aquimaris	Kriegella	Flavobacteriaceae	Flavobacteriales	Flavobacteriia	Bacteroidota	192904	strain: DSM 19886	99.67	0.54	0	0.395997	5019	Scaffold	317933	5.9	1	39	tidal flat	normal
PRJEB16422	SAMN05192545	GCA_900105105.1	Maribacter dokdonensis	Maribacter dokdonensis	Maribacter	Flavobacteriaceae	Flavobacteriales	Flavobacteriia	Bacteroidota	320912	strain: MAR_2009_60	99.67	0.33	0	0.36089	3910	Chromosome	4505700	4.4	3	40	tidal flat	normal
PRJEB16378	SAMN04489797	GCA_900105425.1	Winogradskyella sediminis	Winogradskyella sediminis	Winogradskyella	Flavobacteriaceae	Flavobacteriales	Flavobacteriia	Bacteroidota	1382466	strain: RHA_55	99.67	0.44	0	0.33632	3206	Chromosome	3688345	3.6	3	42	marine	normal
PRJEB16540	SAMN05444338	GCA_900106645.1	Flavobacterium degerlachei	Flavobacterium degerlachei	Flavobacterium	Flavobacteriaceae	Flavobacteriales	Flavobacteriia	Bacteroidota	229203	strain: DSM 15718	99.65	0.8	0	0.340314	3361	Scaffold	214274	3.8	1	43	land	extreme
PRJEB16593	SAMN05216556	GCA_900106795.1	Aequorivita viscosa	Aequorivita viscosa	Aequorivita	Flavobacteriaceae	Flavobacteriales	Flavobacteriia	Bacteroidota	797419	strain: CGMCC 1.11023	98.25	0.95	0	0.366015	3133	Scaffold	102451	3.5	1	34	tidal flat	normal
PRJEB16633	SAMN05421540	GCA_900107595.1	Psychroflexus halocasei	Psychroflexus halocasei	Psychroflexus	Flavobacteriaceae	Flavobacteriales	Flavobacteriia	Bacteroidota	908615	strain: DSM 23581	98.67	0.62	0	0.333887	2466	Scaffold	299256	2.6	1	33	land	normal
PRJEB16638	SAMN04487990	GCA_900107625.1	Bizionia paragorgiae	Bizionia paragorgiae	Bizionia	Flavobacteriaceae	Flavobacteriales	Flavobacteriia	Bacteroidota	283786	strain: DSM 23842	99.67	0.44	0	0.352652	2866	Scaffold	180576	3.1	0	35	marine	normal
PRJEB16699	SAMN04488130	GCA_900108015.1	Flavobacterium urumqiense	Flavobacterium urumqiense	Flavobacterium	Flavobacteriaceae	Flavobacteriales	Flavobacteriia	Bacteroidota	935224	strain: CGMCC 1.9230	98.59	0	0	0.334902	3094	Scaffold	228498	3.4	1	42	land	extreme
PRJEB16692	SAMN05660493	GCA_900108115.1	Epilithonimonas bovis DSM 19482	Epilithonimonas bovis	Epilithonimonas	Weeksellaceae	Flavobacteriales	Flavobacteriia	Bacteroidota	1121284	strain: DSM 19482	100	0	0	0.382255	3263	Scaffold	76010	3.3	0	37	land	normal
PRJEB16112	SAMN02927937	GCA_900108395.1	Myroides aquimaris	Myroides aquimaris	Myroides	Flavobacteriaceae	Flavobacteriales	Flavobacteriia	Bacteroidota	1159016	strain: CGMCC 1.10825	98.8	0.88	33.33	0.354256	2893	Scaffold	54326	2.9	1	52	marine	normal
PRJEB16817	SAMN05660918	GCA_900108955.1	Flavobacterium terrigena	Flavobacterium terrigena	Flavobacterium	Flavobacteriaceae	Flavobacteriales	Flavobacteriia	Bacteroidota	402734	strain: DSM 17934	99.65	0	0	0.311533	2853	Scaffold	283557	3.1	1	39	land	normal
PRJEB16806	SAMN04488018	GCA_900109075.1	Myroides marinus	Myroides marinus	Myroides	Flavobacteriaceae	Flavobacteriales	Flavobacteriia	Bacteroidota	703342	strain: DSM 23048	99.65	0.82	0	0.335652	3749	Scaffold	152185	4.1	0	60	marine	normal
PRJEB16848	SAMN04488008	GCA_900109345.1	Maribacter orientalis	Maribacter orientalis	Maribacter	Flavobacteriaceae	Flavobacteriales	Flavobacteriia	Bacteroidota	228957	strain: DSM 16471	99.67	0.67	0	0.351067	3723	Scaffold	574194	4.1	1	38	tidal flat	normal
PRJEB16824	SAMN04487910	GCA_900109375.1	Aquimarina amphilecti	Aquimarina amphilecti	Aquimarina	Flavobacteriaceae	Flavobacteriales	Flavobacteriia	Bacteroidota	1038014	strain: DSM 25232	99.62	0.29	0	0.319636	4685	Scaffold	539579	5.2	1	52	marine	normal
PRJEB16887	SAMN05421856	GCA_900109935.1	Chryseobacterium taichungense	Chryseobacterium taichungense	Chryseobacterium	Weeksellaceae	Flavobacteriales	Flavobacteriia	Bacteroidota	295069	strain: DSM 17453	100	0	0	0.364955	4064	Scaffold	492814	4.4	1	56	land	normal
PRJEB16936	SAMN04487942	GCA_900110375.1	Flavobacterium sinopsychrotolerans	Flavobacterium sinopsychrotolerans	Flavobacterium	Flavobacteriaceae	Flavobacteriales	Flavobacteriia	Bacteroidota	604089	strain: CGMCC 1.8704	99.29	0.65	25	0.341542	3098	Scaffold	301652	3.5	1	44	land	extreme
PRJEB16957	SAMN04488097	GCA_900110605.1	Epilithonimonas lactis	Epilithonimonas lactis	Epilithonimonas	Weeksellaceae	Flavobacteriales	Flavobacteriia	Bacteroidota	421072	strain: DSM 19921	100	0	0	0.377607	3833	Scaffold	916393	4	1	42	land	normal
PRJEB17009	SAMN05444355	GCA_900111075.1	Flavobacterium frigoris	Flavobacterium frigoris	Flavobacterium	Flavobacteriaceae	Flavobacteriales	Flavobacteriia	Bacteroidota	229204	strain: DSM 15719	99.65	2.51	7.14	0.342117	3552	Scaffold	229665	4	1	45	land	extreme
PRJEB17166	SAMN04488010	GCA_900112245.1	Maribacter stanieri	Maribacter stanieri	Maribacter	Flavobacteriaceae	Flavobacteriales	Flavobacteriia	Bacteroidota	440514	strain: DSM 19891	99.67	0.92	0	0.343737	3877	Scaffold	805828	4.4	1	36	tidal flat	normal
PRJEB17181	SAMN04487891	GCA_900112295.1	Muricauda antarctica	Muricauda antarctica	Muricauda	Flavobacteriaceae	Flavobacteriales	Flavobacteriia	Bacteroidota	1055723	strain: DSM 26351	99.67	1.64	0	0.451507	4099	Scaffold	281024	4.4	3	41	marine	extreme
PRJEB17208	SAMN05216297	GCA_900112575.1	Flavobacterium phragmitis	Flavobacterium phragmitis	Flavobacterium	Flavobacteriaceae	Flavobacteriales	Flavobacteriia	Bacteroidota	739143	strain: CGMCC 1.10370	99.65	0.9	20	0.340689	5001	Scaffold	289032	5.9	1	58	land	normal
PRJEB17211	SAMN04487987	GCA_900112595.1	Algibacter pectinivorans	Algibacter pectinivorans	Algibacter	Flavobacteriaceae	Flavobacteriales	Flavobacteriia	Bacteroidota	870482	strain: DSM 25730	99.01	0.33	0	0.333714	3148	Scaffold	323559	3.6	1	38	tidal flat	normal
PRJEB17261	SAMN04488131	GCA_900112975.1	Flavobacterium xueshanense	Flavobacterium xueshanense	Flavobacterium	Flavobacteriaceae	Flavobacteriales	Flavobacteriia	Bacteroidota	935223	strain: CGMCC 1.9227	99.29	0	0	0.341451	3109	Scaffold	160146	3.4	0	41	land	extreme
PRJEB17282	SAMN04488033	GCA_900113135.1	Salegentibacter agarivorans	Salegentibacter agarivorans	Salegentibacter	Flavobacteriaceae	Flavobacteriales	Flavobacteriia	Bacteroidota	345907	strain: DSM 23515	99.43	0.57	0	0.368295	3790	Scaffold	157518	4.2	1	39	marine	normal
PRJEB17396	SAMN04487893	GCA_900114085.1	Myroides guanonis	Myroides guanonis	Myroides	Flavobacteriaceae	Flavobacteriales	Flavobacteriia	Bacteroidota	1150112	strain: DSM 26542	99.65	0.47	0	0.332822	2694	Scaffold	132154	3.1	0	52	land	normal
PRJEB17114	SAMN05444143	GCA_900114945.1	Flavobacterium succinicans	Flavobacterium succinicans	Flavobacterium	Flavobacteriaceae	Flavobacteriales	Flavobacteriia	Bacteroidota	29536	strain: DSM 4002	99.65	0.53	0	0.354544	3181	Scaffold	255203	3.6	1	45	land	normal
PRJEB17121	SAMN05421738	GCA_900115015.1	Algoriella xinjiangensis	Algoriella xinjiangensis	Algoriella	Weeksellaceae	Flavobacteriales	Flavobacteriia	Bacteroidota	684065	strain: XJ109	99.64	0	0	0.309255	3039	Scaffold	209268	3.2	1	71	land	normal
PRJEB17148	SAMN05660413	GCA_900115145.1	Salegentibacter flavus	Salegentibacter flavus	Salegentibacter	Flavobacteriaceae	Flavobacteriales	Flavobacteriia	Bacteroidota	287099	strain: DSM 17794	99.24	2.09	0	0.397833	3354	Scaffold	134440	3.6	0	39	tidal flat	normal
PRJEB17154	SAMN04487989	GCA_900115185.1	Bizionia echini	Bizionia echini	Bizionia	Flavobacteriaceae	Flavobacteriales	Flavobacteriia	Bacteroidota	649333	strain: DSM 23925	99.67	0.33	0	0.33672	3024	Scaffold	446676	3.3	3	41	tidal flat	normal
PRJEB17123	SAMN04490243	GCA_900115205.1	Robiginitalea myxolifaciens	Robiginitalea myxolifaciens	Robiginitalea	Flavobacteriaceae	Flavobacteriales	Flavobacteriia	Bacteroidota	400055	strain: DSM 21019	98.35	0	0	0.488703	2835	Scaffold	1368757	3.1	1	37	marine	normal
PRJEB17547	SAMN04488006	GCA_900116115.1	Lutibacter maritimus	Lutibacter maritimus	Lutibacter	Flavobacteriaceae	Flavobacteriales	Flavobacteriia	Bacteroidota	593133	strain: DSM 24450	98.32	0.45	0	0.294993	3092	Scaffold	296920	3.4	2	41	tidal flat	normal
PRJEB17558	SAMN05216474	GCA_900116425.1	Lishizhenia tianjinensis	Lishizhenia tianjinensis	Lishizhenia	Crocinitomicaceae	Flavobacteriales	Flavobacteriia	Bacteroidota	477690	strain: CGMCC 1.7005	100	0	0	0.373976	3125	Scaffold	407984	3.5	1	41	tidal flat	normal
PRJEB17604	SAMN05216480	GCA_900116665.1	Pustulibacterium marinum	Pustulibacterium marinum	Pustulibacterium	Flavobacteriaceae	Flavobacteriales	Flavobacteriia	Bacteroidota	1224947	strain: CGMCC 1.12333	99.01	0.49	0	0.354002	3726	Scaffold	182714	4.1	1	41	marine	normal
PRJEB17761	SAMN05660313	GCA_900119145.1	Cellulophaga fucicola	Cellulophaga fucicola	Cellulophaga	Flavobacteriaceae	Flavobacteriales	Flavobacteriia	Bacteroidota	76595	strain: DSM 24786	99.67	0.11	0	0.320803	3463	Scaffold	441303	3.8	1	31	marine	normal
PRJEB17756	SAMN02927921	GCA_900119185.1	Sinomicrobium oceani	Sinomicrobium oceani	Sinomicrobium	Flavobacteriaceae	Flavobacteriales	Flavobacteriia	Bacteroidota	1150368	strain: CGMCC 1.12145	99.17	2.41	0	0.44801	4272	Scaffold	185765	4.9	1	43	marine	normal
PRJEB18172	SAMN05444278	GCA_900129035.1	Psychroflexus salarius	Psychroflexus salarius	Psychroflexus	Flavobacteriaceae	Flavobacteriales	Flavobacteriia	Bacteroidota	1155689	strain: DSM 25661	99.11	0.32	0	0.334372	2315	Scaffold	283648	2.5	1	33	tidal flat	extreme
PRJEB18160	SAMN03080594	GCA_900129275.1	Arenibacter palladensis	Arenibacter palladensis	Arenibacter	Flavobacteriaceae	Flavobacteriales	Flavobacteriia	Bacteroidota	237373	strain: DSM 17539	99.67	0.38	0	0.39651	4584	Scaffold	500776	5.4	1	35	marine	normal
PRJEB18190	SAMN05444408	GCA_900129385.1	Chryseobacterium takakiae	Chryseobacterium takakiae	Chryseobacterium	Weeksellaceae	Flavobacteriales	Flavobacteriia	Bacteroidota	1302685	strain: DSM 26898	100	0.49	0	0.369633	3772	Scaffold	234433	4.1	1	57	land	extreme
PRJEB18196	SAMN05444483	GCA_900129445.1	Salegentibacter echinorum	Salegentibacter echinorum	Salegentibacter	Flavobacteriaceae	Flavobacteriales	Flavobacteriia	Bacteroidota	1073325	strain: DSM 24579	99.43	0	0	0.371555	3484	Scaffold	391231	3.9	1	39	marine	normal
PRJEB18207	SAMN05443663	GCA_900129555.1	Flavobacterium defluvii	Flavobacterium defluvii	Flavobacterium	Flavobacteriaceae	Flavobacteriales	Flavobacteriia	Bacteroidota	370979	strain: DSM 17963	99.65	0.67	0	0.337295	4197	Scaffold	373644	4.8	1	55	land	normal
PRJEB18209	SAMN05444396	GCA_900129575.1	Flavobacterium segetis	Flavobacterium segetis	Flavobacterium	Flavobacteriaceae	Flavobacteriales	Flavobacteriia	Bacteroidota	271157	strain: DSM 19741	98.59	0.35	0	0.325715	2925	Scaffold	404617	3.4	1	39	land	extreme
PRJEB18210	SAMN05444372	GCA_900129585.1	Flavobacterium micromati	Flavobacterium micromati	Flavobacterium	Flavobacteriaceae	Flavobacteriales	Flavobacteriia	Bacteroidota	229205	strain: DSM 17659	99.29	1.74	10	0.331318	3210	Scaffold	214813	3.6	1	42	land	extreme
PRJEB18255	SAMN05444281	GCA_900130035.1	Wenyingzhuangia marina	Wenyingzhuangia marina	Wenyingzhuangia	Flavobacteriaceae	Flavobacteriales	Flavobacteriia	Bacteroidota	1195760	strain: DSM 100572	96.85	0.9	33.33	0.312161	2763	Scaffold	707963	3.2	1	45	tidal flat	normal
PRJEB18282	SAMN05216261	GCA_900141715.1	Arenitalea lutea	Arenitalea lutea	Arenitalea	Flavobacteriaceae	Flavobacteriales	Flavobacteriia	Bacteroidota	1178825	strain: CGMCC 1.12213	99.34	0.71	0	0.33313	2962	Scaffold	435799	3.3	1	36	tidal flat	normal
PRJEB18291	SAMN04488508	GCA_900141785.1	Aquimarina spongiae	Aquimarina spongiae	Aquimarina	Flavobacteriaceae	Flavobacteriales	Flavobacteriia	Bacteroidota	570521	strain: DSM 22623	99.62	0.46	0	0.359325	4742	Scaffold	410840	5.2	1	40	marine	normal
PRJEB18297	SAMN04488513	GCA_900141855.1	Pseudozobellia thermophila	Pseudozobellia thermophila	Pseudozobellia	Flavobacteriaceae	Flavobacteriales	Flavobacteriia	Bacteroidota	192903	strain: DSM 19858	99.67	1.04	25	0.470842	4216	Scaffold	335218	4.9	2	39	marine	normal
PRJEB18298	SAMN04488096	GCA_900141885.1	Mesonia phycicola	Mesonia phycicola	Mesonia	Flavobacteriaceae	Flavobacteriales	Flavobacteriia	Bacteroidota	579105	strain: DSM 21425	99.62	0.76	0	0.313891	2993	Scaffold	372035	3.2	1	34	tidal flat	normal
PRJEB18304	SAMN04487911	GCA_900141935.1	Arenibacter nanhaiticus	Arenibacter nanhaiticus	Arenibacter	Flavobacteriaceae	Flavobacteriales	Flavobacteriia	Bacteroidota	558155	strain: CGMCC 1.8863	99.67	0.83	0	0.389912	3612	Scaffold	98110	4.3	0	51	marine	normal
PRJEB18312	SAMN05444337	GCA_900142055.1	Flavobacterium haoranii	Flavobacterium haoranii	Flavobacterium	Flavobacteriaceae	Flavobacteriales	Flavobacteriia	Bacteroidota	683124	strain: DSM 22807	99.28	0.12	0	0.310883	2649	Scaffold	1500186	2.8	1	39	land	normal
PRJEB18327	SAMN04488007	GCA_900142175.1	Maribacter aquivivus	Maribacter aquivivus	Maribacter	Flavobacteriaceae	Flavobacteriales	Flavobacteriia	Bacteroidota	228958	strain: DSM 16478	99.67	1.03	0	0.344927	3990	Scaffold	2373344	4.5	1	37	tidal flat	normal
PRJEB18354	SAMN05444267	GCA_900142445.1	Chryseobacterium polytrichastri	Chryseobacterium polytrichastri	Chryseobacterium	Weeksellaceae	Flavobacteriales	Flavobacteriia	Bacteroidota	1302687	strain: DSM 26899	100	0.25	0	0.337069	4662	Scaffold	107694	5	1	68	land	normal
PRJEB18366	SAMN05443634	GCA_900142565.1	Chishuiella changwenlii	Chishuiella changwenlii	Chishuiella	Weeksellaceae	Flavobacteriales	Flavobacteriia	Bacteroidota	1434701	strain: DSM 27989	100	0	0	0.295506	3120	Scaffold	305184	3.4	1	73	land	normal
PRJEB18371	SAMN05444407	GCA_900142615.1	Chryseobacterium contaminans	Chryseobacterium contaminans	Chryseobacterium	Weeksellaceae	Flavobacteriales	Flavobacteriia	Bacteroidota	1423959	strain: DSM 27621	100	0.98	0	0.358363	4216	Scaffold	447739	4.6	1	82	land	normal
PRJEB18381	SAMN05444387	GCA_900142715.1	Flavobacterium pectinovorum	Flavobacterium pectinovorum	Flavobacterium	Flavobacteriaceae	Flavobacteriales	Flavobacteriia	Bacteroidota	29533	strain: DSM 6368	99.65	1.11	0	0.33556	4673	Scaffold	714232	5.5	1	50	land	normal
PRJEB18387	SAMN05443543	GCA_900142775.1	Flavobacterium flevense	Flavobacterium flevense	Flavobacterium	Flavobacteriaceae	Flavobacteriales	Flavobacteriia	Bacteroidota	983	strain: DSM 1076	99.29	0.08	0	0.341626	3527	Scaffold	366991	4.1	1	45	land	normal
PRJEB18398	SAMN05216269	GCA_900142885.1	Flavobacterium xinjiangense	Flavobacterium xinjiangense	Flavobacterium	Flavobacteriaceae	Flavobacteriales	Flavobacteriia	Bacteroidota	178356	strain: CGMCC 1.2749	98.94	0	0	0.339982	3441	Scaffold	235935	3.8	1	45	land	extreme
PRJEB18407	SAMN05878281	GCA_900142975.1	Salegentibacter salegens	Salegentibacter salegens	Salegentibacter	Flavobacteriaceae	Flavobacteriales	Flavobacteriia	Bacteroidota	143223	strain: ACAM 48	99.43	1.84	33.33	0.372142	3534	Chromosome	4009999	3.9	3	45	land	extreme
PRJEB19713	SAMN05660477	GCA_900167905.1	Soonwooa buanensis	Soonwooa buanensis	Soonwooa	Weeksellaceae	Flavobacteriales	Flavobacteriia	Bacteroidota	619805	strain: DSM 22323	100	0.98	0	0.348371	3083	Scaffold	244071	3.3	1	40	tidal flat	normal
PRJEB19703	SAMN05660866	GCA_900167935.1	Maribacter arcticus	Maribacter arcticus	Maribacter	Flavobacteriaceae	Flavobacteriales	Flavobacteriia	Bacteroidota	561365	strain: DSM 23546	99.5	0.54	0	0.349859	3735	Scaffold	245225	4.1	1	37	marine	extreme
PRJEB19812	SAMEA103587418	GCA_900169075.1	Chryseobacterium phocaeense	Chryseobacterium phocaeense	Chryseobacterium	Weeksellaceae	Flavobacteriales	Flavobacteriia	Bacteroidota	1816690	strain: 6021061333	100	0.25	0	0.388636	4344	Scaffold	3356215	4.7	4	75	land	normal
PRJEB20339	SAMN05660703	GCA_900176415.1	Cellulophaga tyrosinoxydans	Cellulophaga tyrosinoxydans	Cellulophaga	Flavobacteriaceae	Flavobacteriales	Flavobacteriia	Bacteroidota	504486	strain: DSM 21164	99.67	0	0	0.331248	3164	Scaffold	377537	3.5	1	34	tidal flat	normal
PRJEB20273	SAMN03080602	GCA_900177645.1	Arenibacter troitsensis	Arenibacter troitsensis	Arenibacter	Flavobacteriaceae	Flavobacteriales	Flavobacteriia	Bacteroidota	188872	strain: DSM 19835	99.67	0.54	0	0.395635	4429	Scaffold	377144	5.2	1	35	marine	normal
PRJEB20685	SAMN06265171	GCA_900182655.1	Chryseobacterium rhizoplanae	Chryseobacterium rhizoplanae	Chryseobacterium	Weeksellaceae	Flavobacteriales	Flavobacteriia	Bacteroidota	1609531	strain: DSM 29371	100	0.25	0	0.363831	4614	Scaffold	413710	5.1	1	75	land	normal
PRJEB6403	SAMEA44541418	GCA_900187255.1	Capnocytophaga haemolytica	Capnocytophaga haemolytica	Capnocytophaga	Flavobacteriaceae	Flavobacteriales	Flavobacteriia	Bacteroidota	45243	strain: NCTC12947	100	1.43	0	0.442337	2422	Complete Genome	2688499	2.6	4	49	land	normal
PRJEB21395	SAMN06265371	GCA_900188235.1	Lutibacter agarilyticus	Lutibacter agarilyticus	Lutibacter	Flavobacteriaceae	Flavobacteriales	Flavobacteriia	Bacteroidota	1109740	strain: DSM 29150	97.65	2.69	10	0.312341	3396	Scaffold	443075	4	1	39	tidal flat	normal
PRJEB21400	SAMN06265376	GCA_900188275.1	Dokdonia pacifica	Dokdonia pacifica	Dokdonia	Flavobacteriaceae	Flavobacteriales	Flavobacteriia	Bacteroidota	1627892	strain: DSM 25597	99.62	0.92	0	0.341052	4898	Scaffold	532546	5.4	1	67	marine	normal
PRJEB21404	SAMN04488111	GCA_900188355.1	Lutibacter flavus	Lutibacter flavus	Lutibacter	Flavobacteriaceae	Flavobacteriales	Flavobacteriia	Bacteroidota	691689	strain: DSM 27993	98.15	1.35	0	0.30043	3387	Scaffold	491140	3.8	4	43	tidal flat	normal
PRJEB21402	SAMN04488009	GCA_900188415.1	Maribacter sedimenticola	Maribacter sedimenticola	Maribacter	Flavobacteriaceae	Flavobacteriales	Flavobacteriia	Bacteroidota	228956	strain: DSM 19840	99.67	0.99	0	0.375073	3699	Scaffold	776522	4.2	0	36	tidal flat	normal
PRJEB21331	SAMEA104150437	GCA_900198195.1	Tenacibaculum jejuense	Tenacibaculum jejuense	Tenacibaculum	Flavobacteriaceae	Flavobacteriales	Flavobacteriia	Bacteroidota	584609	strain: type strain: KCTC 22618	99.66	0.45	0	0.303069	4038	Complete Genome	4614879	4.5	3	71	tidal flat	normal
PRJEB22443	SAMN06265377	GCA_900215465.1	Muricauda parva	Muricauda parva	Muricauda	Flavobacteriaceae	Flavobacteriales	Flavobacteriia	Bacteroidota	1247520	strain: DSM 25885	99.67	0.22	0	0.383656	3921	Scaffold	595490	4.3	1	36	marine	normal
PRJEB25868	SAMEA4644770	GCA_900489485.1	Aequorivita lipolytica	Aequorivita lipolytica	Aequorivita	Flavobacteriaceae	Flavobacteriales	Flavobacteriia	Bacteroidota	153267	strain: type strain: CIP107455	99.62	0.27	0	0.376634	3050	Scaffold	313570	3.2	1	36	marine	extreme
PRJEB6403	SAMEA24550918	GCA_900637665.1	Chryseobacterium nakagawai	Chryseobacterium nakagawai	Chryseobacterium	Weeksellaceae	Flavobacteriales	Flavobacteriia	Bacteroidota	1241982	strain: NCTC13529	100	0.49	50	0.353953	5138	Complete Genome	5602501	5.5	8	96	land	normal
PRJEB6403	SAMEA26407168	GCA_900637795.1	Weeksella virosa	Weeksella virosa	Weeksella	Weeksellaceae	Flavobacteriales	Flavobacteriia	Bacteroidota	1014	strain: NCTC11634	100	0	0	0.35935	2134	Complete Genome	2287133	2.3	5	61	land	normal
PRJEB6403	SAMEA48409918	GCA_900637895.1	Kaistella antarctica	Kaistella antarctica	Kaistella	Weeksellaceae	Flavobacteriales	Flavobacteriia	Bacteroidota	266748	strain: NCTC13489	100	1.14	0	0.361154	2851	Complete Genome	3137220	3.1	3	42	land	extreme
PRJEB6403	SAMEA104167194	GCA_900638245.1	Kaistella jeonii	Kaistella jeonii	Kaistella	Weeksellaceae	Flavobacteriales	Flavobacteriia	Bacteroidota	266749	strain: NCTC13459	100	1.86	0	0.349522	3031	Complete Genome	3288745	3.2	2	39	land	extreme
PRJEB6403	SAMEA104200672	GCA_900683625.1	Chryseobacterium taihuense	Chryseobacterium taihuense	Chryseobacterium	Weeksellaceae	Flavobacteriales	Flavobacteriia	Bacteroidota	1141221	strain: 3012STDY6944375	100	0	0	0.353446	3416	Complete Genome	3685675	3.6	5	63	land	normal
PRJEB31339	SAMEA6080497	GCA_902506355.1	Maribacter litoralis	Maribacter litoralis	Maribacter	Flavobacteriaceae	Flavobacteriales	Flavobacteriia	Bacteroidota	2059726	isolate: Maribacter sp. 151	99.67	0.44	0	0.358961	3753	Scaffold	880576	4.3	1	36	tidal flat	normal
PRJEB36401	SAMEA6526577	GCA_902804485.1	Flavobacterium collinsii	Flavobacterium collinsii	Flavobacterium	Flavobacteriaceae	Flavobacteriales	Flavobacteriia	Bacteroidota	1114861	isolate: CECT7796	99.65	1.24	25	0.351282	4843	Scaffold	87618	5.6	1	54	land	normal
PRJEB38866	SAMEA6952714	GCA_903819435.1	Flavobacterium salmonis	Flavobacterium salmonis	Flavobacterium	Flavobacteriaceae	Flavobacteriales	Flavobacteriia	Bacteroidota	2654844	strain: CIP 111411	99.65	1.18	0	0.337151	5110	Scaffold	250437	5.7	1	62	land	normal
PRJEB36401	SAMEA7306553	GCA_904425415.1	Flavobacterium bizetiae	Flavobacterium bizetiae	Flavobacterium	Flavobacteriaceae	Flavobacteriales	Flavobacteriia	Bacteroidota	2704140	strain: CIP 105534	99.65	0.91	25	0.340231	4975	Scaffold	110303	5.7	2	64	land	normal
PRJEB44171	SAMEA8533642	GCA_907163105.1	Cloacibacterium caeni	Cloacibacterium caeni	Cloacibacterium	Weeksellaceae	Flavobacteriales	Flavobacteriia	Bacteroidota	2004710	isolate: Isolate2	100	0.25	0	0.330877	2522	Complete Genome	2718917	2.7	3	42	land	normal
PRJNA54	SAMN02598536	GCF_000014145.1	Cytophaga hutchinsonii ATCC 33406	Cytophaga hutchinsonii	Cytophaga	Cytophagaceae	Cytophagales	Cytophagia	Bacteroidota	269798	strain: ATCC 33406	100	0	0	0.388465	3780	Complete Genome	4433218	4.3	3	38	land	normal
PRJNA20829	SAMN02598437	GCF_000023125.1	Dyadobacter fermentans DSM 18053	Dyadobacter fermentans	Dyadobacter	Spirosomaceae	Cytophagales	Cytophagia	Bacteroidota	471854	strain: DSM 18053	99.7	0.3	0	0.51545	5865	Complete Genome	6967790	6.8	4	38	land	normal
PRJNA18947	SAMN02436092	GCF_000166275.1	Algoriphagus machipongonensis	Algoriphagus machipongonensis	Algoriphagus	Cyclobacteriaceae	Cytophagales	Cytophagia	Bacteroidota	388413	strain: PR1	99.62	0	0	0.386939	4029	Chromosome	4786724	4.7	3	38	tidal flat	normal
PRJNA38283	SAMN00191237	GCF_000166395.1	Leadbetterella byssophila DSM 17132	Leadbetterella byssophila	Leadbetterella	Spirosomaceae	Cytophagales	Cytophagia	Bacteroidota	649349	strain: DSM 17132	98.96	0.3	0	0.404136	3655	Complete Genome	4059653	4	3	42	land	normal
PRJNA49125	SAMN02232050	GCF_000218895.1	Runella slithyformis DSM 19594	Runella slithyformis	Runella	Spirosomaceae	Cytophagales	Cytophagia	Bacteroidota	761193	strain: DSM 19594	100	0.6	0	0.464233	6001	Complete Genome	6568739	6.7	2	43	land	normal
PRJNA51773	SAMN02261369	GCF_000222485.1	Cyclobacterium marinum DSM 745	Cyclobacterium marinum	Cyclobacterium	Cyclobacteriaceae	Cytophagales	Cytophagia	Bacteroidota	880070	strain: DSM 745	100	0.69	0	0.381461	5114	Complete Genome	6221273	6.1	3	38	marine	normal
PRJNA50619	SAMN02232009	GCF_000265405.1	Belliella baltica DSM 15883	Belliella baltica	Belliella	Cyclobacteriaceae	Cytophagales	Cytophagia	Bacteroidota	866536	strain: DSM 15883	100	0	0	0.368131	3832	Complete Genome	4196595	4.1	4	38	marine	normal
PRJNA51775	SAMN02261370	GCF_000265505.1	Bernardetia litoralis DSM 6794	Bernardetia litoralis	Bernardetia	Bernardetiaceae	Cytophagales	Cytophagia	Bacteroidota	880071	strain: DSM 6794	100	0.55	0	0.306718	4060	Complete Genome	4919337	4.8	3	49	tidal flat	normal
PRJNA65035	SAMN02232018	GCF_000325705.1	Echinicola vietnamensis DSM 17526	Echinicola vietnamensis	Echinicola	Cyclobacteriaceae	Cytophagales	Cytophagia	Bacteroidota	926556	strain: DSM 17526	100	0	0	0.447537	4631	Complete Genome	5608040	5.5	4	45	tidal flat	normal
PRJEA114711	SAMEA2272250	GCF_000331105.1	Fibrella aestuarina BUZ 2	Fibrella aestuarina	Fibrella	Spirosomaceae	Cytophagales	Cytophagia	Bacteroidota	1166018	strain: BUZ 2	100	1.19	0	0.564397	5773	Chromosome	902348	6.7	3	70	tidal flat	normal
PRJNA169723	SAMN02441712	GCF_000373265.1	Pontibacter roseus DSM 17521	Pontibacter roseus	Pontibacter	Hymenobacteraceae	Cytophagales	Cytophagia	Bacteroidota	1122967	strain: DSM 17521	100	0	0	0.526574	4002	Scaffold	626903	4.5	1	41	land	normal
PRJNA169822	SAMN02441375	GCF_000374025.1	Spirosoma panaciterrae DSM 21099	Spirosoma panaciterrae	Spirosoma	Cytophagaceae	Cytophagales	Cytophagia	Bacteroidota	1123277	strain: DSM 21099	100	0.15	0	0.489051	6833	Scaffold	250262	7.9	1	45	land	normal
PRJNA169825	SAMN02441024	GCF_000374065.1	Spirosoma luteum DSM 19990	Spirosoma luteum	Spirosoma	Cytophagaceae	Cytophagales	Cytophagia	Bacteroidota	1123276	strain: DSM 19990	99.4	0.45	50	0.507277	5741	Scaffold	212398	6.4	1	36	land	extreme
PRJNA169826	SAMN02441695	GCF_000374085.1	Spirosoma spitsbergense DSM 19989	Spirosoma spitsbergense	Spirosoma	Cytophagaceae	Cytophagales	Cytophagia	Bacteroidota	1123278	strain: DSM 19989	100	0.74	25	0.504118	6776	Scaffold	63256	7.4	1	40	land	extreme
PRJNA165383	SAMN02256446	GCF_000379725.1	Cytophaga aurantiaca DSM 3654	Cytophaga aurantiaca	Cytophaga	Cytophagaceae	Cytophagales	Cytophagia	Bacteroidota	1121373	strain: DSM 3654	100	0.3	0	0.370746	3871	Scaffold	180147	4.3	1	36	land	normal
PRJNA165391	SAMN02256418	GCF_000379765.1	Flexithrix dorotheae DSM 6795	Flexithrix dorotheae	Flexithrix	Flammeovirgaceae	Cytophagales	Cytophagia	Bacteroidota	1121904	strain: DSM 6795	99.4	0.6	0	0.363392	7351	Scaffold	337135	9.2	2	46	tidal flat	normal
PRJNA187097	SAMN02441320	GCF_000382205.1	Dyadobacter beijingensis DSM 21582	Dyadobacter beijingensis	Dyadobacter	Spirosomaceae	Cytophagales	Cytophagia	Bacteroidota	1121482	strain: DSM 21582	99.69	0.3	0	0.520844	6041	Scaffold	1218747	7.2	1	36	land	normal
PRJNA187098	SAMN02441650	GCF_000382225.1	Hymenobacter aerophilus DSM 13606	Hymenobacter aerophilus	Hymenobacter	Hymenobacteraceae	Cytophagales	Cytophagia	Bacteroidota	1121953	strain: DSM 13606	99.4	0.3	0	0.620897	3751	Scaffold	147743	4.2	0	43	land	normal
PRJNA81941	SAMN02261300	GCF_000383955.1	Rudanella lutea DSM 19387	Rudanella lutea	Rudanella	Cytophagaceae	Cytophagales	Cytophagia	Bacteroidota	1089547	strain: DSM 19387	100	0.6	0	0.543513	5304	Scaffold	5708050	6.4	3	39	land	normal
PRJNA185628	SAMN02441588	GCF_000420705.1	Hymenobacter norwichensis DSM 15439	Hymenobacter norwichensis	Hymenobacter	Hymenobacteraceae	Cytophagales	Cytophagia	Bacteroidota	1121957	strain: DSM 15439	100	0	0	0.564131	4989	Scaffold	759903	5.9	1	41	land	normal
PRJNA185583	SAMN02441176	GCF_000422585.1	Hugenholtzia roseola DSM 9546	Hugenholtzia roseola	Hugenholtzia	Bernardetiaceae	Cytophagales	Cytophagia	Bacteroidota	1121903	strain: DSM 9546	99.45	0	0	0.421696	3393	Scaffold	93289	4.2	1	46	land	normal
PRJNA185655	SAMN02441156	GCF_000423565.1	Runella zeae DSM 19591	Runella zeae	Runella	Spirosomaceae	Cytophagales	Cytophagia	Bacteroidota	1123078	strain: DSM 19591	100	0	0	0.421424	6421	Scaffold	155998	7.4	1	37	land	normal
PRJNA195817	SAMN02441513	GCF_000426725.1	Sporocytophaga myxococcoides DSM 11118	Sporocytophaga myxococcoides	Sporocytophaga	Cytophagaceae	Cytophagales	Cytophagia	Bacteroidota	926565	strain: DSM 11118	100	1.49	0	0.361087	5180	Scaffold	559258	6.2	1	49	land	normal
PRJNA63323	SAMN00262208	GCF_000427405.1	Flectobacillus major DSM 103	Flectobacillus major	Flectobacillus	Spirosomaceae	Cytophagales	Cytophagia	Bacteroidota	929703	strain: DSM 103	100	0.61	0	0.377699	4967	Scaffold	3317189	6.1	3	53	marine	normal
PRJNA185354	SAMN02440874	GCF_000428845.1	Dyadobacter alkalitolerans DSM 23607	Dyadobacter alkalitolerans	Dyadobacter	Spirosomaceae	Cytophagales	Cytophagia	Bacteroidota	1121481	strain: DSM 23607	100	0	0	0.456676	5533	Scaffold	423870	6.1	0	34	land	extreme
PRJNA185541	SAMN02441202	GCF_000429425.1	Algoriphagus mannitolivorans DSM 15301	Algoriphagus mannitolivorans	Algoriphagus	Cyclobacteriaceae	Cytophagales	Cytophagia	Bacteroidota	1120965	strain: DSM 15301	100	0	0	0.427277	3651	Scaffold	334964	4.1	1	39	tidal flat	normal
PRJNA185542	SAMN02440865	GCF_000429445.1	Algoriphagus terrigena DSM 22685	Algoriphagus terrigena	Algoriphagus	Cyclobacteriaceae	Cytophagales	Cytophagia	Bacteroidota	1120967	strain: DSM 22685	100	0	0	0.478338	4972	Scaffold	212985	5.6	1	40	land	normal
PRJNA185543	SAMN02441203	GCF_000429465.1	Algoriphagus vanfongensis DSM 17529	Algoriphagus vanfongensis	Algoriphagus	Cyclobacteriaceae	Cytophagales	Cytophagia	Bacteroidota	1120968	strain: DSM 17529	100	0	0	0.428219	4031	Scaffold	471639	4.6	1	38	tidal flat	normal
PRJNA185582	SAMN02440687	GCF_000430505.1	Eisenibacter elegans DSM 3317	Eisenibacter elegans	Eisenibacter	Microscillaceae	Cytophagales	Cytophagia	Bacteroidota	1121902	strain: DSM 3317	99.09	0.3	0	0.479445	3446	Scaffold	430419	3.9	1	46	marine	normal
PRJNA76501	SAMN02441120	GCF_000473365.1	Adhaeribacter aquaticus DSM 16391	Adhaeribacter aquaticus	Adhaeribacter	Hymenobacteraceae	Cytophagales	Cytophagia	Bacteroidota	926549	strain: DSM 16391	100	0.74	0	0.396474	4521	Scaffold	590206	5	1	40	land	normal
PRJNA195806	SAMN02440771	GCF_000482465.1	Runella limosa DSM 17973	Runella limosa	Runella	Spirosomaceae	Cytophagales	Cytophagia	Bacteroidota	1123077	strain: DSM 17973	100	0.6	0	0.442702	6278	Scaffold	151509	7.4	1	35	land	normal
PRJNA234054	SAMN03081528	GCF_000576555.1	Hymenobacter swuensis DY53	Hymenobacter swuensis	Hymenobacter	Hymenobacteraceae	Cytophagales	Cytophagia	Bacteroidota	1227739	strain: DY53	99.85	0.3	0	0.596242	4496	Complete Genome	4904241	5.1	3	42	land	normal
PRJNA221040	SAMN02841160	GCF_000701505.1	Dyadobacter crusticola DSM 16708	Dyadobacter crusticola	Dyadobacter	Spirosomaceae	Cytophagales	Cytophagia	Bacteroidota	1121483	strain: DSM 16708	100	0	0	0.467327	5352	Scaffold	465525	6	0	38	land	normal
PRJNA263711	SAMN03105797	GCF_000807855.2	Flammeovirga pacifica	Flammeovirga pacifica	Flammeovirga	Flammeovirgaceae	Cytophagales	Cytophagia	Bacteroidota	915059	strain: WPAGA1	98.51	1.62	0	0.32897	4995	Scaffold	445839	6.4	2	83	marine	normal
PRJNA263316	SAMN03098875	GCF_000973725.1	Pontibacter korlensis	Pontibacter korlensis	Pontibacter	Hymenobacteraceae	Cytophagales	Cytophagia	Bacteroidota	400092	strain: X14-1T	99.7	1.64	14.29	0.473443	4713	Complete Genome	5462537	5.3	4	49	land	extreme
PRJNA271221	SAMN03273316	GCF_000974425.1	Spirosoma radiotolerans	Spirosoma radiotolerans	Spirosoma	Cytophagaceae	Cytophagales	Cytophagia	Bacteroidota	1379870	strain: DG5A	99.7	0.45	0	0.494722	5868	Complete Genome	7029352	6.8	3	41	land	normal
PRJNA289169	SAMN03846661	GCF_001050135.1	Cyclobacterium amurskyense	Cyclobacterium amurskyense	Cyclobacterium	Cyclobacteriaceae	Cytophagales	Cytophagia	Bacteroidota	320787	strain: KCTC 12363	100	0.3	0	0.383108	4937	Complete Genome	6158829	6	4	38	marine	normal
PRJNA273395	SAMN03291399	GCF_001078055.1	Rufibacter radiotolerans	Rufibacter radiotolerans	Rufibacter	Hymenobacteraceae	Cytophagales	Cytophagia	Bacteroidota	1379910	strain: DG31D	99.95	0.55	0	0.513454	3909	Complete Genome	4820793	4.7	2	41	land	normal
PRJNA242661	SAMN02711851	GCF_001310085.1	Rufibacter tibetensis	Rufibacter tibetensis	Rufibacter	Hymenobacteraceae	Cytophagales	Cytophagia	Bacteroidota	512763	strain: 1351	100	0.6	0	0.474261	4495	Complete Genome	5165513	5.3	4	46	land	normal
PRJNA305453	SAMN04325376	GCF_001507645.1	Hymenobacter sedentarius	Hymenobacter sedentarius	Hymenobacter	Hymenobacteraceae	Cytophagales	Cytophagia	Bacteroidota	1411621	strain: DG5B	99.4	0.3	100	0.609647	3994	Complete Genome	4868852	4.8	3	41	land	normal
PRJNA296932	SAMN04111281	GCF_001593605.1	Algoriphagus sanaruensis	Algoriphagus sanaruensis	Algoriphagus	Cyclobacteriaceae	Cytophagales	Cytophagia	Bacteroidota	1727163	strain: M8-2	100	0	0	0.414084	3345	Complete Genome	3882610	3.8	3	39	land	normal
PRJNA314846	SAMN04544428	GCF_001611675.1	Pontibacter akesuensis	Pontibacter akesuensis	Pontibacter	Hymenobacteraceae	Cytophagales	Cytophagia	Bacteroidota	388950	strain: AKS 1T	100	0	0	0.510176	4109	Complete Genome	4713421	4.7	4	43	land	extreme
PRJNA351726	SAMN05953464	GCF_001870735.1	Arsenicibacter rosenii	Arsenicibacter rosenii	Arsenicibacter	Spirosomaceae	Cytophagales	Cytophagia	Bacteroidota	1750698	strain: SM-1	100	0.74	0	0.515163	6502	Scaffold	339151	7.4	1	53	land	normal
PRJNA308406	SAMN04395154	GCF_001988955.1	Spirosoma montaniterrae	Spirosoma montaniterrae	Spirosoma	Cytophagaceae	Cytophagales	Cytophagia	Bacteroidota	1178516	strain: DY10	100	0.45	0	0.526977	5069	Complete Genome	5797678	5.6	3	40	land	normal
PRJNA378888	SAMN06554014	GCF_002056795.1	Spirosoma aerolatum	Spirosoma aerolatum	Spirosoma	Cytophagaceae	Cytophagales	Cytophagia	Bacteroidota	1211326	strain: KACC 17939	100	1.49	0	0.483471	6788	Complete Genome	7959595	7.7	3	45	land	normal
PRJNA378889	SAMN06554015	GCF_002067135.1	Spirosoma rigui	Spirosoma rigui	Spirosoma	Cytophagaceae	Cytophagales	Cytophagia	Bacteroidota	564064	strain: KCTC 12531	100	0.3	0	0.544263	4791	Complete Genome	5828404	5.7	3	44	land	normal
PRJNA389246	SAMN07193049	GCF_002807035.1	Algoriphagus formosus	Algoriphagus formosus	Algoriphagus	Cyclobacteriaceae	Cytophagales	Cytophagia	Bacteroidota	2007308	strain: XAY3209	100	0	0	0.418793	3968	Scaffold	1215173	4.4	1	40	tidal flat	normal
PRJNA420349	SAMN08109548	GCF_002831565.1	Spirosoma pollinicola	Spirosoma pollinicola	Spirosoma	Cytophagaceae	Cytophagales	Cytophagia	Bacteroidota	2057025	strain: Ha7	100	1.79	18.18	0.478459	7821	Complete Genome	8794837	8.5	1	41	land	normal
PRJNA402522	SAMN07621665	GCF_003003005.1	Mongoliibacter ruber	Mongoliibacter ruber	Mongoliibacter	Cyclobacteriaceae	Cytophagales	Cytophagia	Bacteroidota	1750599	strain: DSM 27929	100	0.02	0	0.392923	4238	Scaffold	263683	4.9	1	46	land	extreme
PRJNA402470	SAMN07621054	GCF_003014575.1	Cecembia rubra	Cecembia rubra	Cecembia	Cyclobacteriaceae	Cytophagales	Cytophagia	Bacteroidota	1485585	strain: DSM 28057	100	0.31	0	0.394756	4076	Scaffold	276579	4.6	1	38	land	normal
PRJNA402482	SAMN07621227	GCF_003014695.1	Dyadobacter jiangsuensis	Dyadobacter jiangsuensis	Dyadobacter	Spirosomaceae	Cytophagales	Cytophagia	Bacteroidota	1591085	strain: DSM 29057	100	0.6	0	0.502553	6868	Scaffold	439748	8	1	36	land	normal
PRJNA442673	SAMN08776303	GCF_003096355.1	Pontibacter virosus	Pontibacter virosus	Pontibacter	Hymenobacteraceae	Cytophagales	Cytophagia	Bacteroidota	1765052	strain: DSM 100231	100	0.51	0	0.50096	4284	Scaffold	282824	4.8	1	43	land	normal
PRJNA449135	SAMN09065711	GCF_003143535.1	Aquirufa nivalisilvae	Aquirufa nivalisilvae	Aquirufa	Cytophagaceae	Cytophagales	Cytophagia	Bacteroidota	2516557	strain: HME7025	96.3	0	0	0.37908	2636	Complete Genome	3116291	3.1	3	37	land	normal
PRJNA262072	SAMN03080612	GCF_003148625.1	Arcicella aurantiaca	Arcicella aurantiaca	Arcicella	Spirosomaceae	Cytophagales	Cytophagia	Bacteroidota	591202	strain: DSM 22214	99.55	0.3	0	0.351061	5013	Scaffold	95841	5.8	1	39	land	normal
PRJNA402520	SAMN07620964	GCF_003149085.1	Dyadobacter jejuensis	Dyadobacter jejuensis	Dyadobacter	Spirosomaceae	Cytophagales	Cytophagia	Bacteroidota	1082580	strain: DSM 100346	99.7	0	0	0.453906	4751	Scaffold	315168	5.6	0	36	tidal flat	normal
PRJNA331508	SAMN05444386	GCF_003149185.1	Sediminitomix flava	Sediminitomix flava	Sediminitomix	Flammeovirgaceae	Cytophagales	Cytophagia	Bacteroidota	379075	strain: DSM 28229	98.96	2.98	0	0.356288	5042	Scaffold	998100	6.4	1	103	marine	normal
PRJNA453646	SAMN08984992	GCF_003149515.1	Hymenobacter nivis	Hymenobacter nivis	Hymenobacter	Hymenobacteraceae	Cytophagales	Cytophagia	Bacteroidota	1850093	strain: NBRC 111535	98.76	0.3	0	0.625146	4452	Complete Genome	5027597	4.9	3	42	land	extreme
PRJNA402453	SAMN07621195	GCF_003253485.1	Algoriphagus aquaeductus	Algoriphagus aquaeductus	Algoriphagus	Cyclobacteriaceae	Cytophagales	Cytophagia	Bacteroidota	475299	strain: T4	99.62	0.75	0	0.442091	4332	Scaffold	203156	4.8	1	46	land	normal
PRJNA262068	SAMN03080604	GCF_003254055.1	Algoriphagus chordae	Algoriphagus chordae	Algoriphagus	Cyclobacteriaceae	Cytophagales	Cytophagia	Bacteroidota	237019	strain: DSM 19830	100	0.31	0	0.406087	4390	Scaffold	177836	5.1	1	34	tidal flat	normal
PRJNA262067	SAMN03080613	GCF_003254355.1	Algoriphagus ratkowskyi	Algoriphagus ratkowskyi	Algoriphagus	Cyclobacteriaceae	Cytophagales	Cytophagia	Bacteroidota	57028	strain: DSM 22686	100	0.31	0	0.394001	4309	Scaffold	277321	4.9	1	36	marine	extreme
PRJNA471374	SAMN09208224	GCF_003258705.1	Arcticibacterium luteifluviistationis	Arcticibacterium luteifluviistationis	Arcticibacterium	Spirosomaceae	Cytophagales	Cytophagia	Bacteroidota	1784714	strain: SM1504	98.36	1.19	0	0.371974	4432	Complete Genome	5379839	5.2	2	36	marine	extreme
PRJNA262066	SAMN03080608	GCF_003259505.1	Algoriphagus yeomjeoni	Algoriphagus yeomjeoni	Algoriphagus	Cyclobacteriaceae	Cytophagales	Cytophagia	Bacteroidota	291403	strain: DSM 23446	100	0.38	0	0.402753	4259	Scaffold	370184	4.9	1	35	tidal flat	extreme
PRJNA262275	SAMN05660371	GCF_003259745.1	Larkinella arboricola	Larkinella arboricola	Larkinella	Spirosomaceae	Cytophagales	Cytophagia	Bacteroidota	643671	strain: DSM 21851	99.7	0.6	0	0.518164	5720	Scaffold	843432	6.8	1	39	land	normal
PRJNA475619	SAMN09397062	GCF_003260975.1	Echinicola strongylocentroti	Echinicola strongylocentroti	Echinicola	Cyclobacteriaceae	Cytophagales	Cytophagia	Bacteroidota	1795355	strain: MEBiC08714	100	0	0	0.441398	4956	Complete Genome	6252144	6.1	4	45	marine	normal
PRJNA479381	SAMN09536026	GCF_003325355.1	Runella rosea	Runella rosea	Runella	Spirosomaceae	Cytophagales	Cytophagia	Bacteroidota	2259595	strain: HYN0085	100	0.07	100	0.446622	6024	Complete Genome	6810953	7	3	43	land	normal
PRJNA481606	SAMN09685082	GCF_003339505.1	Runella aurantiaca	Runella aurantiaca	Runella	Spirosomaceae	Cytophagales	Cytophagia	Bacteroidota	2282308	strain: YX9	100	0	0	0.447926	6015	Scaffold	196565	7	2	40	land	normal
PRJNA440001	SAMN08770194	GCF_003386095.1	Marinoscillum furvescens DSM 4134	Marinoscillum furvescens	Marinoscillum	Reichenbachiellaceae	Cytophagales	Cytophagia	Bacteroidota	1122208	strain: DSM 4134	99.7	1.55	0	0.454375	4736	Scaffold	160862	5.8	1	37	marine	normal
PRJNA485237	SAMN09939603	GCF_003583365.1	Fibrisoma montanum	Fibrisoma montanum	Fibrisoma	Spirosomaceae	Cytophagales	Cytophagia	Bacteroidota	2305895	strain: HYT19	100	0.45	0	0.539864	6641	Scaffold	727038	7.6	3	45	land	normal
PRJNA486436	SAMN09858241	GCF_003583985.1	Algoriphagus lacus	Algoriphagus lacus	Algoriphagus	Cyclobacteriaceae	Cytophagales	Cytophagia	Bacteroidota	2056311	strain: N3	99.62	0	0	0.439235	4033	Scaffold	419902	4.6	2	38	land	normal
PRJNA386053	SAMN06924458	GCF_003585765.1	Pontibacter actiniarum	Pontibacter actiniarum	Pontibacter	Hymenobacteraceae	Cytophagales	Cytophagia	Bacteroidota	323450	strain: DSM 19842	99.97	0.89	0	0.531587	4352	Complete Genome	4770770	4.9	5	51	tidal flat	normal
PRJNA490823	SAMN10059839	GCF_003589925.1	Chryseolinea soli	Chryseolinea soli	Chryseolinea	Fulvivirgaceae	Cytophagales	Cytophagia	Bacteroidota	2321403	strain: KIS68-18	99.98	1.39	0	0.508713	6852	Complete Genome	8241389	8	2	47	land	normal
PRJNA484662	SAMN09767476	GCF_003703975.1	Larkinella soli	Larkinella soli	Larkinella	Spirosomaceae	Cytophagales	Cytophagia	Bacteroidota	1770527	strain: MIMbqt9	100	0.3	0	0.576417	5888	Scaffold	312642	6.7	2	42	land	normal
PRJNA503954	SAMN10386256	GCF_003721515.1	Rufibacter latericius	Rufibacter latericius	Rufibacter	Hymenobacteraceae	Cytophagales	Cytophagia	Bacteroidota	2487040	strain: R-22-1 c-1	100	0.45	0	0.502327	4595	Scaffold	442299	5.5	1	43	land	normal
PRJNA503948	SAMN10386327	GCF_003721565.1	Rufibacter immobilis	Rufibacter immobilis	Rufibacter	Hymenobacteraceae	Cytophagales	Cytophagia	Bacteroidota	1348778	strain: MCC P1	99.88	0.8	0	0.512729	3996	Scaffold	608625	4.7	1	43	land	extreme
PRJNA506468	SAMN10461745	GCF_003858635.1	Larkinella rosea	Larkinella rosea	Larkinella	Spirosomaceae	Cytophagales	Cytophagia	Bacteroidota	2025312	strain: KCTC52004	100	0.89	0	0.508674	6555	Scaffold	1269924	7.9	1	45	tidal flat	normal
PRJNA508283	SAMN10518956	GCF_003970675.1	Flammeovirga pectinis	Flammeovirga pectinis	Flammeovirga	Flammeovirgaceae	Cytophagales	Cytophagia	Bacteroidota	2494373	strain: L12M1	98.51	1.77	0	0.321328	5155	Complete Genome	5207776	6.5	10	97	land	normal
PRJNA514978	SAMN10740148	GCF_004138325.1	Spirosoma sordidisoli	Spirosoma sordidisoli	Spirosoma	Cytophagaceae	Cytophagales	Cytophagia	Bacteroidota	2502893	strain: TY50	100	0	0	0.554732	6228	Scaffold	716721	7.2	1	44	land	normal
PRJNA510297	SAMN10614814	GCF_004307415.1	Aquirufa antheringensis	Aquirufa antheringensis	Aquirufa	Cytophagaceae	Cytophagales	Cytophagia	Bacteroidota	2516559	strain: 103A-SOEBACH	95.55	0	0	0.426523	2240	Scaffold	585393	2.5	3	35	land	normal
PRJNA519310	SAMN10864729	GCF_004340805.1	Roseivirga ehrenbergii	Roseivirga ehrenbergii	Roseivirga	Roseivirgaceae	Cytophagales	Cytophagia	Bacteroidota	279360	strain: DSM 102268	99.2	0.6	0	0.393265	3739	Scaffold	504446	4.2	1	36	tidal flat	normal
PRJNA523093	SAMN10986350	GCF_004348825.1	Arundinibacter roseus	Arundinibacter roseus	Arundinibacter	Cytophagaceae	Cytophagales	Cytophagia	Bacteroidota	2070510	strain: DMA-K-7a	100	0	0	0.456596	4858	Scaffold	285796	5.7	1	37	land	normal
PRJNA513890	SAMN10716000	GCF_004355185.1	Hymenobacter radiodurans	Hymenobacter radiodurans	Hymenobacter	Hymenobacteraceae	Cytophagales	Cytophagia	Bacteroidota	2496028	strain: 17J36-26	97.99	1.19	0	0.542592	4657	Complete Genome	4728901	4.8	3	43	land	normal
PRJNA526423	SAMN11098717	GCF_004358035.1	Algoriphagus aquimaris	Algoriphagus aquimaris	Algoriphagus	Cyclobacteriaceae	Cytophagales	Cytophagia	Bacteroidota	2547398	strain: F21	100	0	0	0.419471	3830	Scaffold	326923	4.2	1	38	tidal flat	normal
PRJNA463309	SAMN09075498	GCF_004362805.1	Algoriphagus boseongensis	Algoriphagus boseongensis	Algoriphagus	Cyclobacteriaceae	Cytophagales	Cytophagia	Bacteroidota	1442587	strain: CECT 8446	100	0	0	0.411038	3634	Scaffold	541403	4.1	1	39	tidal flat	normal
PRJNA323088	SAMN05216265	GCF_004366575.1	Algoriphagus zhangzhouensis	Algoriphagus zhangzhouensis	Algoriphagus	Cyclobacteriaceae	Cytophagales	Cytophagia	Bacteroidota	1073327	strain: CGMCC 1.11027	100	0.19	0	0.39332	4042	Scaffold	1027989	4.7	1	39	tidal flat	normal
PRJNA450172	SAMN08931443	GCF_005166025.1	Mangrovivirga cuniculi	Mangrovivirga cuniculi	Mangrovivirga	Mangrovivirgaceae	Cytophagales	Cytophagia	Bacteroidota	2715131	strain: R1DC9	98.74	0.69	66.67	0.361261	4249	Complete Genome	4661901	4.6	4	43	tidal flat	normal
PRJNA541188	SAMN11578326	GCF_005281475.1	Echinicola rosea	Echinicola rosea	Echinicola	Cyclobacteriaceae	Cytophagales	Cytophagia	Bacteroidota	1807691	strain: JL3085	99.85	0	0	0.441443	4925	Complete Genome	6064527	5.9	4	42	marine	normal
PRJNA543006	SAMN11651190	GCF_005860765.1	Dyadobacter sediminis	Dyadobacter sediminis	Dyadobacter	Spirosomaceae	Cytophagales	Cytophagia	Bacteroidota	1493691	strain: Z12	99.7	0.3	0	0.448623	5080	Scaffold	1225946	6	1	38	land	normal
PRJNA543014	SAMN11652251	GCF_005860805.1	Dyadobacter luticola	Dyadobacter luticola	Dyadobacter	Spirosomaceae	Cytophagales	Cytophagia	Bacteroidota	1979387	strain: T17	99.69	0.3	0	0.468643	5551	Scaffold	2014903	6.2	1	38	land	normal
PRJNA535395	SAMN11494426	GCF_005870035.1	Spirosoma lacussanchae	Spirosoma lacussanchae	Spirosoma	Cytophagaceae	Cytophagales	Cytophagia	Bacteroidota	1884249	strain: CPCC 100624	100	0.3	0	0.551537	5292	Scaffold	650730	6.2	1	42	land	normal
PRJNA542949	SAMN11649486	GCF_006149045.1	Dyadobacter flavalbus	Dyadobacter flavalbus	Dyadobacter	Spirosomaceae	Cytophagales	Cytophagia	Bacteroidota	2579942	strain: NS28	99.7	0.3	0	0.447991	5356	Scaffold	299584	6.3	1	38	land	normal
PRJNA545865	SAMN11935848	GCF_006337165.1	Hymenobacter jejuensis	Hymenobacter jejuensis	Hymenobacter	Hymenobacteraceae	Cytophagales	Cytophagia	Bacteroidota	2502781	strain: 17J68-5	99.6	0.6	0	0.558918	4216	Complete Genome	5086993	5	3	39	land	normal
PRJNA551101	SAMN12139123	GCF_006575665.1	Echinicola soli	Echinicola soli	Echinicola	Cyclobacteriaceae	Cytophagales	Cytophagia	Bacteroidota	2591634	strain: LN3S3	100	0.3	0	0.439713	4487	Complete Genome	5550304	5.4	4	46	land	extreme
PRJNA556142	SAMN12341032	GCF_007483685.1	Litoribacter populi	Litoribacter populi	Litoribacter	Cyclobacteriaceae	Cytophagales	Cytophagia	Bacteroidota	2598460	strain: XAAS-A1	100	0.89	0	0.4213	4085	Scaffold	382883	4.4	2	63	land	normal
PRJNA552461	SAMN12207150	GCF_007655305.1	Algoriphagus algorifonticola	Algoriphagus algorifonticola	Algoriphagus	Cyclobacteriaceae	Cytophagales	Cytophagia	Bacteroidota	2593007	strain: hg1	100	0.38	0	0.395685	3913	Scaffold	95375	4.4	1	31	marine	extreme
PRJNA554215	SAMN12272955	GCF_007713685.1	Hymenobacter setariae	Hymenobacter setariae	Hymenobacter	Hymenobacteraceae	Cytophagales	Cytophagia	Bacteroidota	2594794	strain: Fur1	99.4	0.89	25	0.583718	5089	Scaffold	614048	5.9	1	43	land	normal
PRJNA554585	SAMN12274116	GCF_008271695.1	Rufibacter hautae	Rufibacter hautae	Rufibacter	Hymenobacteraceae	Cytophagales	Cytophagia	Bacteroidota	2595005	strain: NBS58-1	99.97	0.45	0	0.513386	4691	Scaffold	1646219	5.7	1	41	land	normal
PRJNA554732	SAMN12282845	GCF_008271745.1	Rufibacter glacialis	Rufibacter glacialis	Rufibacter	Hymenobacteraceae	Cytophagales	Cytophagia	Bacteroidota	1259555	strain: MDT1-10-3	99.97	0.45	0	0.519096	4280	Scaffold	565353	5.2	1	39	land	extreme
PRJNA563782	SAMN12687949	GCF_008629685.1	Adhaeribacter rhizoryzae	Adhaeribacter rhizoryzae	Adhaeribacter	Hymenobacteraceae	Cytophagales	Cytophagia	Bacteroidota	2607907	strain: DK36	100	0.69	0	0.433479	5281	Scaffold	193000	6.3	1	36	land	normal
PRJNA573560	SAMN12816965	GCF_008728635.1	Hymenobacter baengnokdamensis	Hymenobacter baengnokdamensis	Hymenobacter	Hymenobacteraceae	Cytophagales	Cytophagia	Bacteroidota	2615203	strain: BRD72	99.11	0	0	0.597798	3765	Complete Genome	4428884	4.3	3	40	land	normal
PRJNA588487	SAMN13245944	GCF_009668025.1	Larkinella terrae	Larkinella terrae	Larkinella	Spirosomaceae	Cytophagales	Cytophagia	Bacteroidota	2025311	strain: KCTC 52001	100	0.6	0	0.512829	6399	Scaffold	506954	7.6	2	41	land	normal
PRJNA523378	SAMN10974931	GCF_009711365.1	Xanthovirga aplysinae	Xanthovirga aplysinae	Xanthovirga	Fulvivirgaceae	Cytophagales	Cytophagia	Bacteroidota	2529853	strain: RKSG123	99.11	2.06	0	0.364896	5105	Scaffold	7210	5.7	1	17	marine	normal
PRJNA523378	SAMN10974937	GCF_009711405.1	Fulvivirga kasyanovii	Fulvivirga kasyanovii	Fulvivirga	Fulvivirgaceae	Cytophagales	Cytophagia	Bacteroidota	396812	strain: JCM 16186	98.3	2.74	0	0.427224	6322	Scaffold	17375	7	1	36	tidal flat	normal
PRJNA523378	SAMN10974929	GCF_009711475.1	Fulvivirga aurantia	Fulvivirga aurantia	Fulvivirga	Fulvivirgaceae	Cytophagales	Cytophagia	Bacteroidota	2529383	strain: RKSG066	98.2	0.71	25	0.394677	4238	Scaffold	8250	4.4	1	33	marine	normal
PRJNA523378	SAMN10974938	GCF_009711525.1	Fulvivirga lutimaris	Fulvivirga lutimaris	Fulvivirga	Fulvivirgaceae	Cytophagales	Cytophagia	Bacteroidota	1819566	strain: KCTC 42720	99.11	0.3	0	0.379056	4323	Scaffold	18309	4.8	1	30	tidal flat	normal
PRJNA557570	SAMN12405228	GCF_009797935.1	Lunatibacter salilacus	Lunatibacter salilacus	Lunatibacter	Cyclobacteriaceae	Cytophagales	Cytophagia	Bacteroidota	2483804	strain: CUG 91308	99.9	0.6	0	0.4208	5597	Scaffold	260592	6.6	1	38	land	extreme
PRJNA601076	SAMN13841288	GCF_009913235.1	Nibribacter ruber	Nibribacter ruber	Nibribacter	Hymenobacteraceae	Cytophagales	Cytophagia	Bacteroidota	2698458	strain: BT10	99.93	0.45	0	0.502936	3696	Complete Genome	4352178	4.3	3	42	land	normal
PRJNA598469	SAMN13706907	GCF_009931655.1	Pontibacter russatus	Pontibacter russatus	Pontibacter	Hymenobacteraceae	Cytophagales	Cytophagia	Bacteroidota	2694929	strain: BT326	99.84	0.3	0	0.545768	4131	Complete Genome	4965849	4.8	3	42	land	normal
PRJNA526424	SAMN11284198	GCF_010015475.1	Pontibacter pamirensis	Pontibacter pamirensis	Pontibacter	Hymenobacteraceae	Cytophagales	Cytophagia	Bacteroidota	2562824	strain: TRT317	100	0.6	0	0.477037	5681	Scaffold	141701	6.3	1	39	land	extreme
PRJNA598472	SAMN13706917	GCF_010092985.1	Pontibacter pudoricolor	Pontibacter pudoricolor	Pontibacter	Hymenobacteraceae	Cytophagales	Cytophagia	Bacteroidota	2694930	strain: BT214	99.4	0.89	0	0.454415	3768	Complete Genome	4344619	4.2	4	45	land	normal
PRJNA603394	SAMN13930951	GCF_010119975.1	Rhodocytophaga rosea	Rhodocytophaga rosea	Rhodocytophaga	Cytophagaceae	Cytophagales	Cytophagia	Bacteroidota	2704465	strain: 172606-1	99.29	1.82	0	0.407495	7647	Complete Genome	8983451	8.7	3	46	land	normal
PRJNA588685	SAMN13230919	GCF_010233585.1	Spirosoma endbachense	Spirosoma endbachense	Spirosoma	Cytophagaceae	Cytophagales	Cytophagia	Bacteroidota	2666025	strain: I-24	100	1.19	0	0.476898	8627	Chromosome	347919	10	4	48	land	normal
PRJNA510297	SAMN10614768	GCF_011090385.1	Aquirufa beregesia	Aquirufa beregesia	Aquirufa	Cytophagaceae	Cytophagales	Cytophagia	Bacteroidota	2516556	strain: 50C-KIRBA	96.3	0	0	0.384886	2789	Scaffold	337238	3.2	3	36	land	normal
PRJNA510297	SAMN12027973	GCF_011250515.1	Aquirufa ecclesiirivi	Aquirufa ecclesiirivi	Aquirufa	Cytophagaceae	Cytophagales	Cytophagia	Bacteroidota	2715124	strain: 50A-KIRBA	96.3	0	0	0.384174	2654	Scaffold	340137	3.1	1	39	land	normal
PRJNA611088	SAMN14331233	GCF_011290685.1	Cyclobacterium plantarum	Cyclobacterium plantarum	Cyclobacterium	Cyclobacteriaceae	Cytophagales	Cytophagia	Bacteroidota	2716263	strain: GBPx2	100	0.1	0	0.430136	5078	Scaffold	347735	6	1	39	tidal flat	normal
PRJNA610465	SAMN14299271	GCF_011604685.1	Spirosoma aureum	Spirosoma aureum	Spirosoma	Cytophagaceae	Cytophagales	Cytophagia	Bacteroidota	2692134	strain: BT328	100	1.19	0	0.476624	7314	Complete Genome	8898242	8.6	3	50	land	normal
PRJNA546757	SAMN12025208	GCF_011761635.1	Thermonema lapsum	Thermonema lapsum	Thermonema	Thermonemataceae	Cytophagales	Cytophagia	Bacteroidota	28195	strain: DSM 5718	98.91	0	0	0.469956	2360	Scaffold	522536	2.7	1	43	land	normal
PRJNA546769	SAMN12025107	GCF_011762185.1	Dyadobacter arcticus	Dyadobacter arcticus	Dyadobacter	Spirosomaceae	Cytophagales	Cytophagia	Bacteroidota	1078754	strain: DSM 102865	99.4	0.3	0	0.439126	5310	Scaffold	1328140	5.9	1	36	land	extreme
PRJNA613700	SAMN14420499	GCF_012275535.1	Hymenobacter artigasi	Hymenobacter artigasi	Hymenobacter	Hymenobacteraceae	Cytophagales	Cytophagia	Bacteroidota	2719616	strain: 1B	99.7	0.6	50	0.61203	4590	Scaffold	228689	5.4	1	40	land	extreme
PRJNA625400	SAMN14599480	GCF_012641475.1	Flammeovirga agarivorans	Flammeovirga agarivorans	Flammeovirga	Flammeovirgaceae	Cytophagales	Cytophagia	Bacteroidota	2726742	strain: SR4	98.66	2.86	0	0.341999	5758	Scaffold	580402	7.2	2	70	marine	normal
PRJNA625623	SAMN14603964	GCF_012844305.1	Flammeovirga aprica JL-4	Flammeovirga aprica	Flammeovirga	Flammeovirgaceae	Cytophagales	Cytophagia	Bacteroidota	694437	strain: ATCC 23126	98.81	3.21	0	0.35243	7168	Scaffold	68398	9.1	3	76	marine	normal
PRJNA626506	SAMN14642395	GCF_012927305.1	Hymenobacter polaris	Hymenobacter polaris	Hymenobacter	Hymenobacteraceae	Cytophagales	Cytophagia	Bacteroidota	2682546	strain: RP-2-7	99.67	0	0	0.628247	4625	Scaffold	1470772	5.4	1	41	land	extreme
PRJNA632487	SAMN14910880	GCF_013127955.1	Spirosoma taeanense	Spirosoma taeanense	Spirosoma	Cytophagaceae	Cytophagales	Cytophagia	Bacteroidota	2735870	strain: TS118	99.85	0.6	0	0.527171	4807	Complete Genome	5691492	5.6	4	39	tidal flat	normal
PRJNA632161	SAMN14915975	GCF_013294115.1	Hymenobacter caeli	Hymenobacter caeli	Hymenobacter	Hymenobacteraceae	Cytophagales	Cytophagia	Bacteroidota	2735894	strain: 9A	99.07	0	0	0.648766	4206	Scaffold	206771	4.9	1	39	land	extreme
PRJNA639424	SAMN15236426	GCF_014075995.1	Adhaeribacter radiodurans	Adhaeribacter radiodurans	Adhaeribacter	Hymenobacteraceae	Cytophagales	Cytophagia	Bacteroidota	2745197	strain: KUDC8001	100	1.14	0	0.407794	5369	Complete Genome	6799362	6.7	3	43	land	normal
PRJNA546758	SAMN12025120	GCF_014195535.1	Runella defluvii	Runella defluvii	Runella	Spirosomaceae	Cytophagales	Cytophagia	Bacteroidota	370973	strain: DSM 17976	100	0	0	0.447503	6387	Scaffold	257941	7.8	1	43	land	normal
PRJNA585435	SAMN13170703	GCF_014199535.1	Hymenobacter latericoloratus	Hymenobacter latericoloratus	Hymenobacter	Hymenobacteraceae	Cytophagales	Cytophagia	Bacteroidota	1411121	strain: DSM 26701	100	0.6	0	0.604486	4348	Scaffold	691642	4.9	0	42	land	normal
PRJNA632255	SAMN14908400	GCF_014202275.1	Rhabdobacter roseus	Rhabdobacter roseus	Rhabdobacter	Cytophagaceae	Cytophagales	Cytophagia	Bacteroidota	1655419	strain: DSM 105074	99.69	0.74	0	0.539587	5702	Scaffold	310700	6.7	1	40	land	normal
PRJNA632256	SAMN14908554	GCF_014202325.1	Hymenobacter luteus	Hymenobacter luteus	Hymenobacter	Hymenobacteraceae	Cytophagales	Cytophagia	Bacteroidota	1411122	strain: DSM 26718	100	0.6	0	0.604457	4348	Scaffold	889925	4.9	0	42	land	normal
PRJNA632088	SAMN14908306	GCF_014204325.1	Arcicella rosea	Arcicella rosea	Arcicella	Spirosomaceae	Cytophagales	Cytophagia	Bacteroidota	502909	strain: S00070	100	0.76	33.33	0.345773	4366	Scaffold	132528	5.2	1	40	land	normal
PRJNA546760	SAMN12025134	GCF_014206875.1	Algoriphagus iocasae	Algoriphagus iocasae	Algoriphagus	Cyclobacteriaceae	Cytophagales	Cytophagia	Bacteroidota	1836499	strain: DSM 102044	100	0	0	0.39093	4646	Scaffold	660495	5.3	1	38	marine	normal
PRJNA639429	SAMN15236438	GCF_014217805.1	Adhaeribacter swui	Adhaeribacter swui	Adhaeribacter	Hymenobacteraceae	Cytophagales	Cytophagia	Bacteroidota	2086471	strain: KCTC 52873	99.97	1.19	0	0.430382	4911	Complete Genome	5968113	6.1	3	43	tidal flat	normal
PRJNA658201	SAMN15835294	GCF_014306105.1	Pontibacter cellulosilyticus	Pontibacter cellulosilyticus	Pontibacter	Hymenobacteraceae	Cytophagales	Cytophagia	Bacteroidota	1720253	strain: SD6	100	0.45	0	0.453753	4001	Scaffold	586710	4.5	1	40	tidal flat	normal
PRJDB10509	SAMD00244913	GCF_014636295.1	Marivirga lumbricoides	Marivirga lumbricoides	Marivirga	Marivirgaceae	Cytophagales	Cytophagia	Bacteroidota	1046115	strain: CGMCC 1.10832	100	1.25	0	0.367773	5050	Scaffold	313828	5.8	1	39	marine	normal
PRJDB10509	SAMD00244945	GCF_014637795.1	Belliella aquatica	Belliella aquatica	Belliella	Cyclobacteriaceae	Cytophagales	Cytophagia	Bacteroidota	1323734	strain: CGMCC 1.12479	100	0	0	0.371626	3920	Scaffold	161273	4.5	1	36	land	extreme
PRJDB10509	SAMD00244959	GCF_014638845.1	Pontibacter amylolyticus	Pontibacter amylolyticus	Pontibacter	Hymenobacteraceae	Cytophagales	Cytophagia	Bacteroidota	1424080	strain: CGMCC 1.12749	100	0.55	0	0.517886	3992	Scaffold	209152	4.5	1	44	marine	extreme
PRJDB10509	SAMD00244996	GCF_014640315.1	Hymenobacter glacieicola	Hymenobacter glacieicola	Hymenobacter	Hymenobacteraceae	Cytophagales	Cytophagia	Bacteroidota	1562124	strain: CGMCC 1.12990	100	0	0	0.593465	4321	Scaffold	461316	4.9	1	44	land	extreme
PRJDB10509	SAMD00245003	GCF_014640435.1	Hymenobacter frigidus	Hymenobacter frigidus	Hymenobacter	Hymenobacteraceae	Cytophagales	Cytophagia	Bacteroidota	1524095	strain: CGMCC 1.14966	100	0.3	0	0.604629	4138	Scaffold	84981	4.7	1	39	land	extreme
PRJDB10509	SAMD00245027	GCF_014641455.1	Hymenobacter cavernae	Hymenobacter cavernae	Hymenobacter	Hymenobacteraceae	Cytophagales	Cytophagia	Bacteroidota	2044852	strain: CGMCC 1.15197	99.7	0.6	50	0.559313	4647	Scaffold	437297	5.5	1	41	land	normal
PRJDB10509	SAMD00245034	GCF_014641595.1	Dyadobacter endophyticus	Dyadobacter endophyticus	Dyadobacter	Spirosomaceae	Cytophagales	Cytophagia	Bacteroidota	1749036	strain: CGMCC 1.15288	99.7	0	0	0.495604	6707	Scaffold	1815801	7.7	1	36	land	normal
PRJDB10508	SAMD00245574	GCF_014651615.1	Persicitalea jodogahamensis	Persicitalea jodogahamensis	Persicitalea	Spirosomaceae	Cytophagales	Cytophagia	Bacteroidota	402147	strain: KCTC 12866	99.11	0.3	0	0.50806	5252	Scaffold	749802	6.2	1	34	tidal flat	normal
PRJNA665079	SAMN16178376	GCF_014841125.1	Echinicola arenosa	Echinicola arenosa	Echinicola	Cyclobacteriaceae	Cytophagales	Cytophagia	Bacteroidota	2774144	strain: CAU 1574	100	0	0	0.398245	4389	Scaffold	774817	5.3	1	38	marine	normal
PRJNA664041	SAMN16192957	GCF_015221875.1	Dyadobacter subterraneus	Dyadobacter subterraneus	Dyadobacter	Spirosomaceae	Cytophagales	Cytophagia	Bacteroidota	2773304	strain: UP-52	99.7	0.89	0	0.399734	6625	Scaffold	6070096	7.6	4	42	land	normal
PRJNA631578	SAMN14884279	GCF_015476655.1	Aquiflexum lacus	Aquiflexum lacus	Aquiflexum	Cyclobacteriaceae	Cytophagales	Cytophagia	Bacteroidota	2483805	strain: CUG 91378	100	0.56	0	0.390382	5190	Scaffold	168093	5.8	1	42	land	normal
PRJNA693892	SAMN17487852	GCF_016775155.1	Fulvivirga marina	Fulvivirga marina	Fulvivirga	Fulvivirgaceae	Cytophagales	Cytophagia	Bacteroidota	2494733	strain: 29W222	100	1.65	0	0.398892	5533	Scaffold	361313	6.6	1	46	tidal flat	normal
PRJNA640991	SAMN15339575	GCF_016894445.1	Dyadobacter sandarakinus	Dyadobacter sandarakinus	Dyadobacter	Spirosomaceae	Cytophagales	Cytophagia	Bacteroidota	2747268	strain: Q3-56	99.7	0	0	0.491224	5173	Complete Genome	6071216	5.9	4	38	land	extreme
PRJNA575502	SAMN17981529	GCF_017051705.1	Algoriphagus lutimaris	Algoriphagus lutimaris	Algoriphagus	Cyclobacteriaceae	Cytophagales	Cytophagia	Bacteroidota	613197	strain: KCTC 22630	100	0.13	0	0.38691	3979	Scaffold	1130750	4.6	1	41	tidal flat	normal
PRJNA700479	SAMN17832407	GCF_017068455.1	Fulvivirga lutea	Fulvivirga lutea	Fulvivirga	Fulvivirgaceae	Cytophagales	Cytophagia	Bacteroidota	2810512	strain: S481	99.9	0.95	0	0.372625	3676	Complete Genome	4137993	4	2	37	marine	normal
PRJNA575502	SAMN17981533	GCF_017254835.1	Algoriphagus aestuariicola	Algoriphagus aestuariicola	Algoriphagus	Cyclobacteriaceae	Cytophagales	Cytophagia	Bacteroidota	1852016	strain: JCM 31546	100	0.56	0	0.478092	4614	Scaffold	630020	5.2	2	43	tidal flat	normal
PRJNA575502	SAMN17818124	GCF_017254845.1	Algoriphagus pacificus	Algoriphagus pacificus	Algoriphagus	Cyclobacteriaceae	Cytophagales	Cytophagia	Bacteroidota	2811234	strain: YJ13C	100	0	0	0.390984	4526	Scaffold	624175	5.2	1	40	tidal flat	normal
PRJNA575502	SAMN17818121	GCF_017254915.1	Algoriphagus oliviformis	Algoriphagus oliviformis	Algoriphagus	Cyclobacteriaceae	Cytophagales	Cytophagia	Bacteroidota	2811231	strain: H41	100	0	0	0.523667	4559	Scaffold	483186	5.2	2	42	tidal flat	normal
PRJNA699703	SAMN17906033	GCF_017355935.1	Telluribacter humicola	Telluribacter humicola	Telluribacter	Spirosomaceae	Cytophagales	Cytophagia	Bacteroidota	1720261	strain: KCTC 42819	100	1.04	0	0.489028	5615	Scaffold	990432	6.4	1	43	land	normal
PRJNA699703	SAMN17885828	GCF_017355955.1	Sabulibacter ruber	Sabulibacter ruber	Sabulibacter	Hymenobacteraceae	Cytophagales	Cytophagia	Bacteroidota	2811901	strain: SYSU D00434	99.84	2.18	0	0.507062	5103	Scaffold	1101095	6	2	43	land	extreme
PRJNA660243	SAMN15941603	GCF_017811155.1	Lunatimonas salinarum	Lunatimonas salinarum	Lunatimonas	Cyclobacteriaceae	Cytophagales	Cytophagia	Bacteroidota	1774590	strain: KCTC 42988	99.85	0.3	0	0.460943	4553	Scaffold	237132	5.3	1	37	tidal flat	extreme
PRJNA730437	SAMN19231646	GCF_018449405.1	Litoribacter alkaliphilus	Litoribacter alkaliphilus	Litoribacter	Cyclobacteriaceae	Cytophagales	Cytophagia	Bacteroidota	1237105	strain: KCTC 32217	100	0.89	0	0.438588	3758	Scaffold	353928	4.2	2	48	tidal flat	extreme
PRJNA731639	SAMN19292109	GCF_018598175.1	Dawidia cretensis	Dawidia cretensis	Dawidia	Cytophagaceae	Cytophagales	Cytophagia	Bacteroidota	2782350	strain: PWU5	99.69	0.89	0	0.515642	6263	Scaffold	141617	7.2	1	48	land	normal
PRJNA731639	SAMN19292111	GCF_018598185.1	Dawidia soli	Dawidia soli	Dawidia	Cytophagaceae	Cytophagales	Cytophagia	Bacteroidota	2782352	strain: PWU37	99.69	1.19	0	0.53814	6156	Scaffold	128008	7.3	1	51	land	normal
PRJNA731639	SAMN19292108	GCF_018598225.1	Chryseosolibacter histidini	Chryseosolibacter histidini	Chryseosolibacter	Cytophagaceae	Cytophagales	Cytophagia	Bacteroidota	2782349	strain: PWU4	99.11	1.75	0	0.501968	6596	Scaffold	210025	7.8	1	54	land	normal
PRJNA731639	SAMN19292110	GCF_018598585.1	Chryseosolibacter indicus	Chryseosolibacter indicus	Chryseosolibacter	Cytophagaceae	Cytophagales	Cytophagia	Bacteroidota	2782351	strain: PWU20	99.11	2.08	11.11	0.3981	5095	Scaffold	72042	5.7	1	41	land	normal
PRJNA733584	SAMN19416144	GCF_018736045.1	Flammeovirga yaeyamensis	Flammeovirga yaeyamensis	Flammeovirga	Flammeovirgaceae	Cytophagales	Cytophagia	Bacteroidota	367791	strain: NBRC:100898	98.36	1.77	0	0.345581	5671	Complete Genome	5191010	7.2	8	92	tidal flat	normal
PRJNA722167	SAMN19416142	GCF_018736065.1	Flammeovirga kamogawensis	Flammeovirga kamogawensis	Flammeovirga	Flammeovirgaceae	Cytophagales	Cytophagia	Bacteroidota	373891	strain: YS10	98.51	1.32	0	0.319322	5343	Complete Genome	4667875	6.8	10	99	tidal flat	normal
PRJNA743145	SAMN19998326	GCF_019443125.1	Pontibacter aydingkolensis	Pontibacter aydingkolensis	Pontibacter	Hymenobacteraceae	Cytophagales	Cytophagia	Bacteroidota	1911536	strain: KACC 19255	100	0.74	0	0.450293	4063	Scaffold	211181	4.6	1	41	land	extreme
PRJNA747045	SAMN20244053	GCF_020463795.1	Echinicola marina	Echinicola marina	Echinicola	Cyclobacteriaceae	Cytophagales	Cytophagia	Bacteroidota	2859768	strain: SCS 3-6	100	1.19	40	0.401147	4700	Complete Genome	5693670	5.5	5	41	marine	normal
PRJNA672211	SAMN16560750	GCF_021596945.1	Mongoliitalea daihaiensis	Mongoliitalea daihaiensis	Mongoliitalea	Cyclobacteriaceae	Cytophagales	Cytophagia	Bacteroidota	2782006	strain: X100-76	100	0.02	0	0.395918	4129	Complete Genome	4816617	4.7	4	46	land	normal
PRJNA794319	SAMN26418661	GCF_022549675.1	Belliella kenyensis	Belliella kenyensis	Belliella	Cyclobacteriaceae	Cytophagales	Cytophagia	Bacteroidota	1472724	strain: DSM 46651	100	0.19	0	0.377017	3905	Scaffold	252486	4.4	1	39	land	extreme
PRJNA820590	SAMN27018319	GCF_022811645.1	Hymenobacter monticola	Hymenobacter monticola	Hymenobacter	Hymenobacteraceae	Cytophagales	Cytophagia	Bacteroidota	1705399	strain: KACC 22596	99.7	0.3	0	0.619021	5101	Complete Genome	5608015	6	3	43	land	normal
PRJNA821356	SAMN27067608	GCF_022827545.1	Hymenobacter tibetensis	Hymenobacter tibetensis	Hymenobacter	Hymenobacteraceae	Cytophagales	Cytophagia	Bacteroidota	497967	strain: KACC 21982	100	0.3	0	0.556267	5142	Complete Genome	5736710	6.2	4	48	land	extreme
PRJNA504383	SAMN10390800	GCF_024343775.1	Lacihabitans soyangensis	Lacihabitans soyangensis	Lacihabitans	Spirosomaceae	Cytophagales	Cytophagia	Bacteroidota	869394	strain: KCTC23259	99.55	2.63	58.33	0.377613	5144	Scaffold	90914	5.5	2	36	land	normal
PRJNA699703	SAMN18221262	GCF_024436355.1	Rufibacter sediminis	Rufibacter sediminis	Rufibacter	Hymenobacteraceae	Cytophagales	Cytophagia	Bacteroidota	2762756	strain: CGMCC 1.16289	99.19	0.74	0	0.520405	4515	Scaffold	398143	5.4	1	41	land	normal
PRJEB16036	SAMN05421823	GCF_900100765.1	Catalinimonas alkaloidigena	Catalinimonas alkaloidigena	Catalinimonas	Catalimonadaceae	Cytophagales	Cytophagia	Bacteroidota	1075417	strain: DSM 25186	99.08	1.04	0	0.565616	5677	Scaffold	434547	6.9	1	42	marine	normal
PRJEB15764	SAMN04488104	GCF_900101705.1	Algoriphagus faecimaris	Algoriphagus faecimaris	Algoriphagus	Cyclobacteriaceae	Cytophagales	Cytophagia	Bacteroidota	686796	strain: DSM 23095	100	0	0	0.413653	4162	Scaffold	86472	4.6	1	36	tidal flat	normal
PRJEB15786	SAMN04487996	GCF_900101885.1	Dyadobacter soli	Dyadobacter soli	Dyadobacter	Spirosomaceae	Cytophagales	Cytophagia	Bacteroidota	659014	strain: DSM 25329	99.7	0	0	0.5047	7369	Scaffold	364972	8.5	1	37	land	normal
PRJEB16168	SAMN04488090	GCF_900103285.1	Siphonobacter aquaeclarae	Siphonobacter aquaeclarae	Siphonobacter	Cytophagaceae	Cytophagales	Cytophagia	Bacteroidota	563176	strain: DSM 21668	99.64	0.36	0	0.543082	5022	Scaffold	422137	6	1	44	land	normal
PRJEB16220	SAMN03080617	GCF_900103735.1	Algoriphagus alkaliphilus	Algoriphagus alkaliphilus	Algoriphagus	Cyclobacteriaceae	Cytophagales	Cytophagia	Bacteroidota	279824	strain: DSM 22703	99.62	0.38	0	0.426352	4370	Scaffold	111431	4.7	1	37	land	normal
PRJEB16609	SAMN04488069	GCF_900107135.1	Hymenobacter psychrophilus	Hymenobacter psychrophilus	Hymenobacter	Hymenobacteraceae	Cytophagales	Cytophagia	Bacteroidota	651662	strain: CGMCC 1.8975	99.55	1.04	75	0.608333	4198	Scaffold	278897	4.6	1	43	land	normal
PRJEB16714	SAMN03080598	GCF_900108085.1	Algoriphagus boritolerans DSM 17298 = JCM 18970	Algoriphagus boritolerans	Algoriphagus	Cyclobacteriaceae	Cytophagales	Cytophagia	Bacteroidota	1120964	strain: DSM 17298	100	0	0	0.427238	4323	Scaffold	136814	4.7	1	35	land	normal
PRJEB16775	SAMN04487995	GCF_900108855.1	Dyadobacter koreensis	Dyadobacter koreensis	Dyadobacter	Spirosomaceae	Cytophagales	Cytophagia	Bacteroidota	408657	strain: DSM 19938	99.7	0.89	0	0.412589	6153	Scaffold	505494	7.1	1	39	land	normal
PRJEB16820	SAMN05192553	GCF_900109255.1	Cyclobacterium xiamenense	Cyclobacterium xiamenense	Cyclobacterium	Cyclobacteriaceae	Cytophagales	Cytophagia	Bacteroidota	1297121	strain: IBRC-M 10761	99.98	0	0	0.484167	4636	Scaffold	350204	5.5	1	37	tidal flat	normal
PRJEB17038	SAMN04487998	GCF_900111515.1	Hymenobacter actinosclerus	Hymenobacter actinosclerus	Hymenobacter	Hymenobacteraceae	Cytophagales	Cytophagia	Bacteroidota	82805	strain: DSM 15310	99.7	0.89	0	0.620473	3731	Scaffold	1231731	4.3	1	44	land	normal
PRJEB17103	SAMN04489723	GCF_900112005.1	Algoriphagus aquimarinus	Algoriphagus aquimarinus	Algoriphagus	Cyclobacteriaceae	Cytophagales	Cytophagia	Bacteroidota	237018	strain: DSM 23399	100	0.19	0	0.402748	4405	Scaffold	191596	5	1	36	marine	normal
PRJEB17173	SAMN05421780	GCF_900112255.1	Flexibacter flexilis DSM 6793	Flexibacter flexilis	Flexibacter	Flexibacteraceae	Cytophagales	Cytophagia	Bacteroidota	927664	strain: DSM 6793	99.39	0.91	0	0.423915	3669	Scaffold	293136	4.2	1	47	land	normal
PRJEB17189	SAMN05216167	GCF_900112365.1	Spirosoma endophyticum	Spirosoma endophyticum	Spirosoma	Cytophagaceae	Cytophagales	Cytophagia	Bacteroidota	662367	strain: DSM 26130	100	0.6	0	0.480202	7600	Scaffold	394884	8.3	1	41	land	normal
PRJEB17270	SAMN04488541	GCF_900113045.1	Thermoflexibacter ruber	Thermoflexibacter ruber	Thermoflexibacter	Thermoflexibacteraceae	Cytophagales	Cytophagia	Bacteroidota	1003	strain: GEY, DSM 9560	97.88	3.55	8.62	0.376917	4556	Scaffold	109599	5.4	2	40	land	normal
PRJEB17318	SAMN04487988	GCF_900113375.1	Algoriphagus hitonicola	Algoriphagus hitonicola	Algoriphagus	Cyclobacteriaceae	Cytophagales	Cytophagia	Bacteroidota	435880	strain: DSM 19315	100	0	0	0.421256	3834	Scaffold	237766	4.2	1	36	land	extreme
PRJEB17162	SAMN04488519	GCF_900115305.1	Algoriphagus ornithinivorans	Algoriphagus ornithinivorans	Algoriphagus	Cyclobacteriaceae	Cytophagales	Cytophagia	Bacteroidota	226506	strain: DSM 15282	100	0	0	0.394541	3576	Scaffold	382828	4	1	34	tidal flat	normal
PRJEB17353	SAMN04515674	GCF_900115665.1	Pseudarcicella hirudinis	Pseudarcicella hirudinis	Pseudarcicella	Spirosomaceae	Cytophagales	Cytophagia	Bacteroidota	1079859	strain: E92,LMG 26720,CCM 7988	100	1.21	0	0.38405	5025	Scaffold	203140	6	1	39	land	normal
PRJEB17442	SAMN04515668	GCF_900115775.1	Siccationidurans arizonensis	Siccationidurans arizonensis	Siccationidurans	Hymenobacteraceae	Cytophagales	Cytophagia	Bacteroidota	1227077	strain: OR362-8,ATCC BAA-1266,JCM 13504	99.7	1.34	20	0.593222	5042	Scaffold	526993	5.9	1	38	land	normal
PRJEB17567	SAMN04489724	GCF_900116615.1	Algoriphagus locisalis	Algoriphagus locisalis	Algoriphagus	Cyclobacteriaceae	Cytophagales	Cytophagia	Bacteroidota	305507	strain: DSM 23445	100	0.38	0	0.411841	4729	Scaffold	441634	5.3	1	39	tidal flat	extreme
PRJEB18224	SAMN04488109	GCF_900129725.1	Chryseolinea serpens	Chryseolinea serpens	Chryseolinea	Fulvivirgaceae	Cytophagales	Cytophagia	Bacteroidota	947013	strain: DSM 24574	99.98	1.98	0	0.511418	6872	Scaffold	1404584	8.1	2	48	land	normal
PRJEB18230	SAMN05444394	GCF_900129785.1	Algoriphagus halophilus	Algoriphagus halophilus	Algoriphagus	Cyclobacteriaceae	Cytophagales	Cytophagia	Bacteroidota	226505	strain: DSM 15292	99.25	0	0	0.39361	4155	Scaffold	2861205	4.9	1	38	tidal flat	normal
PRJEB18330	SAMN04488028	GCF_900142205.1	Reichenbachiella agariperforans	Reichenbachiella agariperforans	Reichenbachiella	Reichenbachiellaceae	Cytophagales	Cytophagia	Bacteroidota	156994	strain: DSM 26134	98.59	0.65	0	0.434081	4063	Scaffold	394515	4.9	1	40	tidal flat	normal
PRJEB18417	SAMN04488057	GCF_900143075.1	Cyclobacterium lianum	Cyclobacterium lianum	Cyclobacterium	Cyclobacteriaceae	Cytophagales	Cytophagia	Bacteroidota	388280	strain: CGMCC 1.6102	100	0	0	0.454553	4724	Scaffold	266214	5.5	1	37	marine	normal
PRJEB18896	SAMN05421545	GCF_900156415.1	Pontibacter lucknowensis	Pontibacter lucknowensis	Pontibacter	Hymenobacteraceae	Cytophagales	Cytophagia	Bacteroidota	1077936	strain: DM9	100	0.15	0	0.501488	3920	Scaffold	1059850	4.4	1	42	land	normal
PRJEB18838	SAMN05421761	GCF_900156785.1	Belliella pelovolcani	Belliella pelovolcani	Belliella	Cyclobacteriaceae	Cytophagales	Cytophagia	Bacteroidota	529505	strain: DSM 46698	99.62	0	0	0.385883	3621	Scaffold	231590	4	1	40	land	extreme
PRJEB19711	SAMN05660293	GCF_900167945.1	Dyadobacter psychrophilus	Dyadobacter psychrophilus	Dyadobacter	Spirosomaceae	Cytophagales	Cytophagia	Bacteroidota	651661	strain: DSM 22270	99.7	0.3	0	0.450507	5748	Scaffold	519136	6.6	1	35	land	normal
PRJEB19715	SAMN05660236	GCF_900167975.1	Ohtaekwangia koreensis	Ohtaekwangia koreensis	Ohtaekwangia	Fulvivirgaceae	Cytophagales	Cytophagia	Bacteroidota	688867	strain: DSM 25262	99.84	0.6	0	0.419286	5902	Scaffold	1073266	7	4	45	tidal flat	normal
PRJEB20325	SAMN04488029	GCF_900176375.1	Reichenbachiella faecimaris	Reichenbachiella faecimaris	Reichenbachiella	Reichenbachiellaceae	Cytophagales	Cytophagia	Bacteroidota	692418	strain: DSM 26133	98.29	1.19	0	0.397982	4054	Scaffold	940865	4.6	3	42	tidal flat	normal
PRJEB20241	SAMN00777080	GCF_900176595.1	Aquiflexum balticum DSM 16537	Aquiflexum balticum	Aquiflexum	Cyclobacteriaceae	Cytophagales	Cytophagia	Bacteroidota	758820	strain: DSM 16537	100	0.19	0	0.393885	5083	Chromosome	5987095	5.8	4	44	marine	normal
PRJEB20272	SAMN05661096	GCF_900177665.1	Marivirga sericea	Marivirga sericea	Marivirga	Marivirgaceae	Cytophagales	Cytophagia	Bacteroidota	1028	strain: DSM 4125	100	0.6	0	0.359527	4103	Scaffold	452908	4.6	2	42	marine	normal
PRJEB21361	SAMN06265337	GCF_900187375.1	Hymenobacter gelipurpurascens	Hymenobacter gelipurpurascens	Hymenobacter	Hymenobacteraceae	Cytophagales	Cytophagia	Bacteroidota	89968	strain: DSM 11116	100	0.89	0	0.569984	4300	Scaffold	2778879	4.9	1	43	land	normal
PRJEB21422	SAMN06296052	GCF_900188175.1	Pontibacter ummariensis	Pontibacter ummariensis	Pontibacter	Hymenobacteraceae	Cytophagales	Cytophagia	Bacteroidota	1610492	strain: NKM1	100	0.89	0	0.503118	5150	Scaffold	202045	5.8	1	41	land	normal
PRJEB21421	SAMN06295967	GCF_900188245.1	Belliella buryatensis	Belliella buryatensis	Belliella	Cyclobacteriaceae	Cytophagales	Cytophagia	Bacteroidota	1500549	strain: 5C	99.62	0	0	0.38258	3380	Scaffold	213228	3.8	1	39	land	extreme
PRJEB22455	SAMN06269250	GCF_900230225.1	Spirosoma fluviale	Spirosoma fluviale	Spirosoma	Cytophagaceae	Cytophagales	Cytophagia	Bacteroidota	1597977	strain: DSM 29961	100	0.1	0	0.502389	6337	Scaffold	1277063	7.6	1	42	land	normal

## Sheet: Supplementary Table 2
Supplementary Table 2: Summary of CAZyme family composition in 702 filtered genomes.
CAZyme_Family	GCA_000016645.1	GCA_000023285.1	GCA_000023465.1	GCA_000024125.1	GCA_000060345.1	GCA_000152985.1	GCA_000153225.1	GCA_000153485.2	GCA_000154725.1	GCA_000186265.1	GCA_000190595.1	GCA_000194605.1	GCA_000196315.1	GCA_000224085.1	GCA_000236705.1	GCA_000243235.1	GCA_000253275.1	GCA_000255455.1	GCA_000260115.1	GCA_000265385.1	GCA_000374405.1	GCA_000378485.1	GCA_000378765.1	GCA_000382125.1	GCA_000382425.1	GCA_000422265.1	GCA_000422365.1	GCA_000422685.1	GCA_000422705.1	GCA_000422725.1	GCA_000423005.1	GCA_000423045.1	GCA_000423065.1	GCA_000423585.1	GCA_000424665.1	GCA_000424985.1	GCA_000425305.1	GCA_000425425.1	GCA_000425445.1	GCA_000425465.1	GCA_000425485.1	GCA_000425505.1	GCA_000425645.1	GCA_000426465.1	GCA_000428485.1	GCA_000429125.1	GCA_000429545.1	GCA_000430025.1	GCA_000430545.1
AA2	0	0	0	0	0	0	0	0	0	0	0	0	0	0	0	0	0	0	0	0	0	0	0	0	0	0	0	0	0	0	0	0	0	0	0	0	0	0	0	0	0	0	0	0	0	0	0	1	0
AA3	0	0	0	0	0	0	0	1	0	0	0	0	0	0	0	0	0	0	0	0	0	0	0	0	1	0	0	0	0	0	1	0	0	0	0	0	0	0	0	0	0	0	0	0	0	0	0	0	0
AA5	0	0	0	0	0	0	0	0	0	0	0	0	0	0	0	0	0	0	0	0	0	0	0	0	0	0	0	0	0	0	2	0	0	0	0	0	0	0	0	0	0	0	0	0	0	0	0	0	0
AA7	0	0	0	0	0	0	0	0	0	0	0	0	0	0	0	0	0	0	0	0	0	0	0	0	0	0	0	0	0	0	0	0	0	0	0	0	0	0	0	0	0	0	0	0	0	0	0	0	0
AA10	0	0	0	0	0	0	0	0	0	0	0	0	0	0	0	0	0	1	0	0	0	0	0	0	0	0	0	0	0	0	0	0	0	0	0	0	0	0	0	0	0	0	0	0	0	0	0	0	0
AA12	0	0	0	0	0	0	0	0	0	0	0	0	0	0	0	0	0	0	0	0	0	0	0	0	0	0	0	0	0	0	0	0	0	0	0	0	0	0	0	0	0	0	0	0	0	0	0	0	0
CBM0	0	0	0	0	0	0	0	0	0	0	0	0	0	0	0	0	0	0	0	0	0	0	0	0	0	0	0	0	0	0	0	0	0	0	0	0	0	0	0	0	0	0	0	0	0	0	0	0	0
CBM2	0	0	0	0	0	0	0	0	0	0	0	0	0	0	0	0	0	0	0	0	0	0	0	0	0	0	0	0	0	0	0	0	0	0	0	0	0	0	0	0	0	0	0	0	0	0	0	0	0
CBM3	0	0	0	0	0	0	0	0	0	0	0	0	0	0	0	0	0	2	0	0	0	0	0	0	0	0	0	0	0	0	0	0	0	0	0	0	0	1	0	0	0	0	0	0	0	0	0	0	0
CBM4	0	0	0	0	0	0	0	1	0	1	0	0	0	0	0	0	0	0	0	0	0	0	1	0	0	0	0	0	0	0	0	0	0	1	1	0	0	0	1	0	0	0	0	0	0	0	0	0	0
CBM5	0	0	0	0	0	0	0	0	0	0	0	0	0	0	0	0	0	0	0	0	0	0	0	0	0	0	0	0	0	0	0	0	0	0	0	0	0	0	0	0	0	0	0	0	0	0	0	1	3
CBM6	4	0	3	2	1	0	1	0	0	2	2	0	0	1	0	0	0	16	0	0	0	1	0	1	0	0	0	0	3	1	0	0	0	2	1	2	0	2	2	0	0	0	1	4	1	0	3	0	0
CBM8	0	0	0	0	0	0	0	0	0	0	0	0	0	0	0	0	0	0	0	0	0	0	0	0	0	0	0	0	0	0	0	0	0	0	0	0	0	0	0	0	0	0	0	0	0	0	0	0	0
CBM9	1	0	1	0	0	2	0	0	0	0	1	0	0	0	0	0	0	1	1	0	0	0	0	0	0	0	0	0	0	0	0	0	0	0	0	1	1	1	1	0	0	0	1	0	0	0	1	0	0
CBM10	0	0	0	0	0	0	0	0	0	0	0	0	0	0	0	0	0	0	0	0	0	0	0	0	0	0	0	0	0	0	0	0	0	0	0	0	0	0	0	0	0	0	0	0	0	0	0	0	0
CBM12	0	0	0	0	0	0	0	0	0	0	0	0	0	0	0	0	0	0	0	0	0	0	0	0	0	0	0	0	0	0	0	0	0	0	0	0	0	0	0	0	0	0	0	0	0	0	0	0	0
CBM13	3	0	1	0	0	1	0	0	0	0	1	0	0	0	0	0	0	1	0	0	0	1	0	0	0	0	0	0	0	1	0	0	0	0	0	0	0	1	0	0	0	0	0	0	0	0	0	0	0
CBM16	0	0	0	0	1	0	0	0	0	0	0	0	0	0	0	0	0	0	0	0	0	0	0	0	0	0	0	0	0	0	0	0	0	0	0	0	0	0	0	0	0	0	0	0	0	0	0	0	0
CBM20	0	0	0	0	0	0	0	0	0	0	0	0	0	0	0	0	0	0	0	0	0	0	0	0	0	1	0	0	0	0	0	0	0	0	0	0	0	0	0	0	0	0	0	1	1	0	0	0	0
CBM23	0	0	0	0	0	0	0	0	0	0	0	0	0	0	0	0	0	0	0	0	0	0	0	0	0	0	0	0	0	0	0	0	0	0	0	0	0	0	0	0	0	0	0	0	0	0	0	0	0
CBM26	1	0	0	0	0	0	0	0	0	0	0	0	0	0	0	0	0	1	0	0	0	0	0	0	0	0	0	0	0	0	0	0	0	0	0	0	0	0	0	0	0	0	0	0	0	0	0	0	0
CBM31	0	0	0	0	0	0	0	0	0	0	0	0	0	0	0	0	0	0	0	0	0	0	0	0	0	0	0	0	0	0	0	0	0	0	0	0	0	0	0	0	0	0	0	0	0	0	0	0	0
CBM32	3	2	0	0	0	0	0	0	0	0	0	0	0	2	0	0	0	0	2	0	0	2	0	0	0	0	1	0	1	4	6	1	1	2	0	4	0	4	2	1	0	1	3	1	1	0	5	0	1
CBM35	0	0	0	0	0	0	0	0	0	0	0	0	0	0	0	0	0	0	0	0	0	1	0	0	0	0	0	0	0	0	0	0	0	0	0	0	0	1	0	0	0	0	0	0	0	0	0	0	0
CBM36	0	0	0	0	0	0	0	0	0	0	0	0	0	0	0	0	0	0	0	0	0	0	0	0	0	0	0	0	0	0	0	0	0	0	0	0	0	0	0	0	0	0	0	0	0	0	0	0	0
CBM38	0	1	0	0	0	0	0	0	0	0	0	0	0	0	0	0	0	0	0	0	0	0	0	0	0	0	0	0	0	0	0	1	0	0	0	0	0	0	0	0	0	0	0	0	0	0	1	0	0
CBM42	0	0	0	0	0	0	0	0	0	0	0	0	0	0	0	0	0	0	0	0	0	0	0	0	0	0	0	0	0	0	0	0	0	0	0	0	0	0	0	0	0	0	0	0	0	0	0	0	0
CBM47	0	0	0	0	0	0	0	0	0	2	1	0	0	0	0	0	0	0	0	0	0	0	0	1	0	0	0	0	0	0	0	0	0	0	0	2	0	0	0	0	0	0	0	0	0	0	2	0	0
CBM48	2	0	2	1	1	1	1	2	2	3	1	0	1	1	0	2	1	1	1	0	0	1	1	1	0	2	0	0	1	1	1	2	3	2	3	1	0	2	3	1	0	2	1	2	2	0	3	0	0
CBM50	6	4	3	2	4	1	3	1	3	3	3	1	3	3	1	3	4	2	1	3	2	2	1	3	2	2	3	3	4	4	2	3	3	2	2	3	4	4	6	3	4	3	3	2	2	2	3	5	3
CBM51	0	0	0	1	0	0	0	0	0	0	0	0	0	0	0	0	0	0	0	0	0	0	0	0	0	0	0	0	0	0	0	0	0	0	0	0	0	0	0	0	0	0	0	1	0	0	0	0	0
CBM56	0	0	0	0	0	0	0	0	0	0	0	0	0	0	0	0	0	0	0	0	0	0	0	0	0	0	0	0	0	0	0	0	0	0	0	0	0	0	0	0	0	0	0	0	0	0	0	0	0
CBM57	1	0	1	3	1	0	0	0	1	0	0	0	0	3	0	1	0	2	0	0	0	1	0	0	0	0	1	0	0	0	1	1	1	1	0	0	0	3	0	0	0	0	1	0	0	0	4	0	0
CBM60	0	0	0	0	0	0	0	0	0	0	0	0	0	0	0	0	0	0	0	0	0	0	0	0	0	0	0	0	0	0	0	0	0	0	0	0	0	0	0	0	0	0	0	0	0	0	0	0	0
CBM61	0	0	0	0	0	1	0	0	0	0	0	0	0	0	0	0	0	0	0	0	0	0	0	0	0	0	0	0	0	0	0	0	0	0	0	0	0	1	1	0	0	0	0	0	0	0	0	0	0
CBM62	0	0	0	0	0	0	0	0	0	0	0	0	0	0	0	0	0	0	0	0	0	0	0	0	0	0	0	0	0	0	0	0	0	0	0	0	0	0	0	0	0	0	0	0	0	0	0	0	0
CBM63	0	0	0	0	0	0	0	0	0	0	0	0	0	0	0	0	0	0	0	0	0	0	0	0	0	0	0	0	0	0	0	0	0	0	0	0	0	0	0	0	0	0	0	0	0	0	0	0	0
CBM64	0	0	0	0	0	0	0	0	0	0	0	0	0	0	0	0	0	0	0	0	0	0	0	0	0	0	0	0	0	0	0	0	0	0	0	0	0	0	0	0	0	0	0	0	0	0	0	0	0
CBM66	0	0	0	0	0	0	0	0	0	0	0	0	0	0	0	0	0	0	0	0	0	0	0	0	0	0	0	0	0	0	0	0	0	0	0	0	0	0	0	0	0	0	0	0	0	0	0	0	0
CBM67	1	0	0	3	0	1	0	0	0	0	0	0	0	0	0	0	0	0	0	0	0	0	0	1	0	0	0	0	0	0	0	0	0	0	0	1	0	1	0	0	0	0	0	0	0	0	0	0	0
CBM73	0	0	0	0	0	0	0	0	0	0	0	0	0	0	0	0	0	0	0	0	0	0	0	0	0	0	0	0	0	0	0	0	0	0	0	0	0	0	0	0	0	0	0	0	0	0	0	0	1
CBM77	1	0	0	0	0	0	0	0	0	0	0	0	0	0	0	0	0	0	0	0	0	0	0	0	0	1	0	0	1	0	0	0	0	0	0	0	0	1	1	0	0	0	0	1	0	0	0	0	0
CBM84	0	0	0	0	0	0	0	0	0	0	0	0	0	0	0	0	0	0	0	0	0	0	0	0	0	0	0	0	0	0	0	0	0	0	0	0	0	0	0	0	0	0	0	0	0	0	0	0	0
CBM85	0	0	0	0	0	0	0	0	0	0	0	0	0	0	0	0	0	0	0	0	0	0	0	0	0	0	0	0	0	0	0	0	0	0	0	0	0	0	0	0	0	0	0	0	0	0	0	0	0
CBM88	0	0	0	0	0	0	0	0	0	0	0	0	0	0	0	0	0	0	0	0	0	0	0	0	0	0	0	0	0	0	0	0	0	0	0	0	0	0	0	0	0	0	0	0	0	0	0	0	0
CBM90	0	0	0	0	0	0	0	0	0	0	0	0	0	0	0	0	0	0	0	0	0	0	0	0	0	0	0	0	0	0	0	0	0	0	0	0	0	0	0	0	0	0	0	0	0	0	0	0	0
CBM91	0	0	0	0	0	1	0	0	0	0	0	0	0	0	0	0	0	0	0	0	0	1	0	0	0	0	0	0	1	1	0	0	0	1	1	0	0	0	0	0	0	0	0	3	0	0	0	0	0
CE0	0	0	0	0	0	0	0	0	0	0	0	0	0	0	0	0	0	0	0	0	0	0	0	0	0	0	0	0	0	0	0	0	0	0	0	0	0	0	0	0	0	0	0	0	0	0	0	0	0
CE1	1	0	5	1	0	1	0	0	1	0	1	0	0	1	0	0	0	1	0	0	0	0	0	1	0	0	0	0	1	0	0	0	0	1	2	1	0	2	3	0	0	0	0	2	0	0	1	0	0
CE2	1	0	0	0	0	0	0	0	0	0	1	0	0	0	0	0	0	0	0	0	0	1	0	0	0	0	0	0	1	1	1	1	0	1	1	0	0	1	1	0	0	0	0	0	0	0	0	0	0
CE3	0	0	0	0	0	0	0	0	0	0	0	0	0	0	1	0	0	0	0	0	0	0	0	0	0	0	0	0	0	0	0	0	0	0	0	0	0	0	0	0	0	0	0	0	0	0	0	0	0
CE4	2	0	2	0	2	1	1	1	1	0	0	1	2	0	2	1	1	0	1	2	0	1	0	0	1	1	1	1	1	2	2	1	2	1	1	1	1	1	3	1	1	1	1	1	1	3	2	2	0
CE6	1	0	1	0	0	0	0	0	0	1	1	0	0	0	0	0	0	0	0	0	0	0	0	0	0	0	0	0	0	0	0	0	0	0	1	0	0	2	1	0	0	0	0	0	0	0	0	0	0
CE7	0	0	0	0	0	0	0	0	0	0	0	0	0	0	0	0	0	0	0	0	0	1	0	0	0	0	0	0	0	0	0	0	0	0	0	0	0	1	0	0	0	0	0	0	0	0	0	0	0
CE8	2	0	0	0	0	3	0	0	0	0	0	0	0	0	0	0	1	0	2	0	0	0	0	0	0	2	0	0	2	0	0	0	2	3	3	0	0	5	1	0	0	0	0	3	1	0	0	0	0
CE9	1	0	0	0	0	0	0	0	0	0	0	0	0	0	0	0	0	0	0	0	0	0	0	0	0	0	0	0	0	0	0	0	0	0	0	1	0	0	1	0	0	0	0	0	0	0	1	0	0
CE11	1	1	1	1	1	1	1	1	1	1	1	1	1	1	1	1	1	1	1	1	1	1	1	1	1	1	1	1	1	1	1	1	1	1	1	1	1	1	1	1	1	1	1	1	1	1	1	1	1
CE12	2	0	0	0	0	3	0	0	0	0	0	0	0	0	0	0	1	0	3	0	0	3	0	0	0	1	0	0	1	0	0	0	2	2	2	0	0	5	3	0	0	0	0	2	0	0	0	0	0
CE14	1	1	1	1	1	0	2	2	1	1	1	1	1	1	1	2	1	1	1	1	1	1	1	2	1	1	1	1	1	1	1	1	1	1	1	1	1	1	1	1	1	1	1	1	1	1	1	1	1
CE15	0	0	1	0	0	0	0	0	0	0	0	0	0	0	0	0	0	0	0	0	0	0	0	1	0	0	0	0	0	0	0	0	0	0	1	1	0	0	0	0	0	0	0	0	0	0	1	0	0
CE19	1	0	0	0	0	0	0	0	0	0	0	0	0	0	0	0	0	0	0	0	0	0	0	0	0	0	0	0	0	0	0	0	0	0	0	0	0	1	0	0	0	0	0	0	0	0	0	0	0
CE20	4	1	1	0	0	1	0	0	0	0	0	0	0	0	0	0	0	0	0	0	0	3	0	0	0	0	0	0	2	3	2	0	0	2	2	3	0	5	4	0	0	0	1	2	1	0	3	0	0
GH0	0	0	1	1	0	1	0	2	2	1	0	0	1	1	0	0	1	2	1	0	0	0	1	2	0	2	1	1	0	0	2	0	0	0	0	7	0	2	0	2	0	0	2	1	1	1	5	0	0
GH1	1	0	1	0	0	0	0	0	0	1	0	0	0	0	0	0	0	1	0	0	0	2	0	1	0	1	0	0	1	2	0	0	0	1	0	0	0	0	1	0	0	0	0	0	0	1	0	0	0
GH2	14	5	10	0	6	9	0	0	2	5	4	1	0	1	0	1	0	6	9	1	0	12	0	1	0	0	1	0	0	8	7	2	1	4	2	2	1	17	16	2	0	0	7	1	0	1	5	1	0
GH3	13	4	10	4	3	7	2	2	4	4	5	3	1	4	1	4	3	4	4	1	2	11	1	5	2	1	3	1	5	11	5	4	4	9	8	2	2	11	12	2	1	6	4	7	4	1	3	1	1
GH4	0	0	0	0	0	0	0	0	0	0	0	0	0	0	0	0	0	0	0	0	0	0	0	0	0	0	0	0	0	0	0	0	0	0	0	0	0	0	0	0	0	0	0	0	0	0	0	0	0
GH5	4	1	3	0	0	3	2	1	1	4	3	1	0	0	0	1	1	7	1	0	0	6	0	1	0	0	1	1	3	9	4	3	1	3	3	1	0	2	5	0	0	1	1	1	1	0	1	0	1
GH6	0	3	0	0	0	0	0	0	0	0	0	0	0	0	0	0	0	0	0	0	0	0	0	0	0	0	0	0	0	0	0	0	0	0	0	0	0	0	0	0	0	0	0	0	0	0	0	0	0
GH8	2	0	0	0	0	0	0	0	0	0	0	0	0	0	0	0	0	1	0	0	0	0	0	0	0	0	0	0	0	0	0	0	0	0	1	0	0	0	1	0	0	0	0	0	0	0	0	0	0
GH9	0	0	0	0	0	0	0	0	0	0	0	0	0	0	0	0	1	2	0	0	0	0	0	1	0	0	0	0	0	0	1	1	0	0	3	0	0	0	3	0	0	0	0	0	0	0	1	0	0
GH10	3	0	3	0	0	0	0	0	0	4	0	0	0	0	0	0	0	0	0	0	0	0	0	0	0	0	0	0	1	0	0	0	0	3	3	0	0	2	3	0	0	4	0	2	1	0	0	0	0
GH11	0	0	0	0	0	0	0	0	0	1	0	0	0	0	0	0	0	0	0	0	0	0	0	0	0	0	0	0	0	0	0	0	0	0	0	0	0	0	0	0	0	0	0	0	0	0	0	0	0
GH12	0	0	0	0	0	0	0	0	0	0	0	0	0	0	0	0	0	0	0	0	0	0	0	0	1	0	0	0	0	0	0	0	0	0	0	0	0	0	0	0	0	0	0	0	0	0	0	0	0
GH13	8	4	4	8	4	7	1	5	7	6	3	0	5	3	0	7	4	6	4	0	0	4	3	6	4	8	3	4	5	5	5	5	6	12	10	3	0	4	8	7	3	4	5	6	5	0	5	0	0
GH14	0	0	0	0	0	0	0	0	0	0	0	0	0	0	0	0	0	0	0	0	0	0	0	0	0	0	0	0	0	0	0	0	0	0	0	0	0	0	0	0	0	0	0	0	0	0	0	0	0
GH15	0	0	2	1	1	2	0	1	0	2	1	0	0	1	0	1	0	0	1	0	0	0	1	1	0	0	1	0	0	0	0	1	1	1	1	1	1	1	0	0	0	1	0	0	0	0	1	0	0
GH16	4	4	4	1	7	3	3	3	1	8	8	2	0	0	0	4	1	27	4	0	0	2	2	2	0	0	2	2	2	4	4	3	4	3	3	2	2	1	4	2	0	2	2	1	1	0	2	0	0
GH17	0	0	0	0	0	0	2	4	4	0	0	0	0	0	0	0	0	0	0	0	0	0	3	2	0	0	0	2	0	0	0	0	0	0	0	0	3	0	0	3	0	0	1	0	0	0	0	0	0
GH18	4	1	1	0	0	0	0	0	0	0	0	0	0	0	1	0	0	0	0	0	0	0	0	0	0	1	0	0	0	0	2	0	0	0	0	0	0	1	2	0	0	0	0	0	0	0	0	0	3
GH19	2	0	0	0	0	0	0	0	1	0	0	0	0	0	0	0	0	0	0	0	0	0	0	0	0	0	0	1	0	0	0	0	0	0	0	0	0	0	0	0	0	0	0	1	0	0	0	0	2
GH20	4	5	3	1	0	2	0	0	1	1	2	1	0	2	0	0	0	0	4	1	0	0	0	1	0	0	0	0	0	0	9	0	1	1	1	8	1	2	4	1	0	0	2	0	0	1	8	1	1
GH23	1	1	3	4	2	2	2	3	2	2	2	3	2	2	3	2	2	3	2	2	0	2	3	4	0	1	2	2	2	2	2	2	3	2	2	2	3	1	1	2	2	2	2	0	0	2	2	2	2
GH24	0	0	0	0	0	0	0	0	0	0	0	0	0	0	0	0	0	0	0	0	1	0	0	0	0	0	0	1	1	0	0	0	0	0	0	0	0	0	0	0	0	0	0	0	0	0	0	0	0
GH25	1	1	0	0	0	0	0	0	1	0	0	1	0	0	0	0	1	0	0	0	1	1	0	0	1	1	0	1	0	1	0	0	0	0	0	0	0	1	1	1	1	1	0	1	1	0	0	1	0
GH26	3	0	3	0	0	0	0	1	0	2	0	0	0	0	0	0	0	0	0	0	0	0	0	0	0	0	0	1	2	2	2	3	1	2	2	0	0	3	3	0	0	0	0	0	0	0	0	0	0
GH27	3	0	0	0	0	0	0	0	0	0	0	0	0	0	0	0	0	1	1	0	0	2	0	0	0	0	0	0	1	2	3	1	0	1	1	0	0	2	2	0	0	0	0	1	0	0	0	0	0
GH28	7	0	1	0	0	5	0	0	0	2	1	0	0	0	0	0	1	2	3	0	0	4	0	0	0	2	0	0	1	0	0	0	2	3	2	0	0	11	6	0	0	0	0	4	1	0	0	0	0
GH29	2	1	4	0	1	3	0	0	0	5	3	1	0	2	0	0	0	2	7	0	0	2	0	1	0	0	0	0	0	0	7	0	0	1	1	2	0	3	6	0	0	0	0	0	0	0	9	0	0
GH30	4	1	6	0	0	1	1	1	1	0	0	0	0	0	0	0	2	0	0	0	0	3	1	2	1	0	0	1	2	5	0	0	0	0	0	0	1	1	7	1	0	1	0	3	3	0	0	0	0
GH31	3	1	3	1	1	2	1	1	2	1	0	0	0	1	0	1	1	2	2	0	0	5	0	1	0	0	0	0	1	4	2	1	1	3	2	1	0	3	2	2	0	2	1	2	0	0	2	0	0
GH32	1	2	2	1	1	1	0	0	0	0	0	0	0	1	0	4	1	0	1	0	0	0	0	1	0	0	0	0	0	0	0	7	2	0	0	3	0	7	0	0	0	0	0	0	0	0	0	0	0
GH33	2	1	1	1	0	1	0	0	0	0	0	0	0	1	0	0	0	0	1	0	0	0	0	1	0	0	0	0	0	0	1	0	0	0	0	7	0	2	1	0	0	0	0	0	0	0	8	0	0
GH34	0	0	0	0	0	0	0	0	0	0	0	0	0	0	0	0	0	0	0	0	0	0	0	0	0	0	0	0	0	0	0	0	0	0	0	0	0	0	0	0	0	0	0	0	0	0	0	0	0
GH35	0	0	1	0	0	1	0	0	0	0	0	0	0	0	0	0	0	0	0	0	0	0	0	0	0	0	0	0	0	0	0	0	0	0	0	0	0	1	3	0	0	0	0	0	1	0	0	0	0
GH36	0	0	0	0	0	0	0	0	0	1	0	0	0	0	0	0	0	1	0	0	0	1	0	0	0	0	0	0	0	1	0	0	0	0	0	0	0	3	0	0	0	0	0	0	0	0	0	0	0
GH37	1	0	1	0	1	1	0	1	0	1	0	0	0	0	0	1	1	0	0	0	0	1	0	1	0	0	0	0	0	1	0	1	1	1	1	0	0	0	0	0	1	0	0	1	1	0	0	0	0
GH38	0	0	0	0	0	0	0	0	0	0	0	0	0	0	0	0	0	0	0	0	0	0	0	0	0	0	0	0	0	0	0	0	0	0	0	0	0	0	0	0	0	0	0	0	0	0	0	0	0
GH39	1	0	0	0	0	1	0	0	0	0	0	0	0	0	0	0	0	0	0	0	0	1	0	0	0	0	0	0	0	1	0	0	0	0	0	0	0	0	1	0	0	0	0	0	1	0	0	0	0
GH42	0	0	0	0	0	0	0	0	0	0	0	0	0	0	0	0	0	0	0	0	0	1	0	0	0	0	0	0	0	1	0	0	0	0	0	0	0	2	1	0	0	0	0	0	0	0	0	0	0
GH43	10	0	16	0	4	18	0	0	1	3	1	0	0	2	0	4	0	0	8	0	0	13	0	1	0	0	1	0	7	12	5	1	2	7	6	1	0	27	21	1	0	3	2	8	3	0	2	0	0
GH44	0	0	0	0	0	0	0	0	0	0	0	0	0	0	0	0	0	0	0	0	0	0	0	0	0	0	0	0	0	0	0	0	0	0	0	0	0	0	0	0	0	0	0	0	0	0	0	0	0
GH46	0	0	0	0	0	0	0	0	0	0	0	0	0	0	0	0	0	0	0	0	0	0	0	0	0	0	0	0	0	0	0	0	0	0	0	0	0	0	0	0	0	0	0	0	0	0	0	0	0
GH47	0	0	0	0	0	0	0	0	0	0	0	0	0	0	0	0	0	0	0	0	0	0	0	0	0	0	0	0	0	0	0	0	0	0	0	0	0	0	0	0	0	0	0	0	0	0	0	0	0
GH48	0	0	0	0	0	0	0	0	0	0	0	0	0	0	0	0	0	1	0	0	0	0	0	0	0	0	0	0	0	0	0	0	0	0	0	0	0	0	0	0	0	0	0	0	0	0	0	0	0
GH49	0	0	0	0	0	0	0	0	0	0	0	0	0	0	0	0	0	0	0	0	0	0	0	0	0	0	0	0	0	0	0	0	0	0	0	0	0	0	0	0	0	0	0	0	0	0	0	0	0
GH50	1	0	0	0	0	0	0	0	0	0	0	0	0	0	0	0	0	4	0	0	0	0	0	0	0	0	0	0	0	0	0	0	0	0	0	0	0	0	1	0	0	0	0	0	0	0	0	0	0
GH51	2	0	3	1	1	3	0	0	0	0	0	0	0	1	0	0	0	0	2	0	0	3	0	1	0	0	0	0	0	3	0	0	0	0	1	0	0	2	3	0	0	0	1	1	0	0	0	0	0
GH53	0	0	0	0	1	0	0	0	0	0	0	0	0	0	0	0	1	0	0	0	0	0	0	0	0	0	0	1	0	0	0	0	0	0	0	0	0	0	2	2	0	0	0	0	0	0	0	0	0
GH54	0	0	0	0	0	0	0	0	0	0	0	0	0	0	0	0	0	0	0	0	0	0	0	0	0	0	0	0	0	0	0	0	0	0	0	0	0	0	0	0	0	0	0	0	0	0	0	0	0
GH55	1	0	0	0	0	0	0	0	0	0	0	0	0	0	0	0	0	0	0	0	0	0	0	0	0	0	0	0	0	0	0	0	0	0	0	0	0	0	1	0	0	0	0	0	0	0	0	0	0
GH57	0	1	0	0	0	0	0	0	0	0	0	0	0	0	0	1	0	0	0	0	0	0	0	0	0	0	0	0	0	0	0	0	0	1	1	0	0	0	0	0	0	0	0	0	0	0	0	0	0
GH59	0	0	0	0	0	0	0	0	0	0	0	0	0	0	0	0	0	0	0	0	0	0	0	0	0	0	0	0	0	0	0	0	0	0	0	0	0	0	0	0	0	0	0	0	0	0	0	0	0
GH62	0	0	0	0	0	0	0	0	0	0	0	0	0	0	0	0	0	0	0	0	0	0	0	0	0	0	0	0	0	0	0	0	0	0	0	0	0	0	0	0	0	0	0	0	0	0	0	0	0
GH63	0	0	0	0	2	0	0	1	0	1	1	0	0	0	0	0	0	0	0	0	0	0	0	0	0	0	1	0	0	0	1	1	0	0	0	0	0	0	0	0	0	1	0	0	0	0	0	0	0
GH64	1	0	0	0	0	0	0	0	1	0	0	0	0	0	0	0	0	0	0	0	0	0	0	0	0	0	0	0	0	0	0	0	0	0	0	0	0	0	0	0	0	0	0	0	0	0	0	0	0
GH65	3	2	1	1	1	1	0	1	1	1	1	0	1	1	0	3	1	1	1	0	0	1	1	1	1	0	1	1	1	1	1	1	1	2	2	1	0	0	1	1	1	1	1	0	0	0	1	0	0
GH66	1	1	0	0	0	0	0	0	0	0	0	0	0	0	0	0	0	0	0	0	0	0	0	0	0	0	0	0	0	0	0	0	0	1	0	0	0	1	0	0	0	0	0	0	0	0	0	0	0
GH67	1	0	1	1	0	0	0	0	0	0	0	0	0	0	0	0	0	0	0	0	0	0	0	1	0	0	0	0	1	1	0	0	0	1	1	0	0	1	1	0	0	0	0	1	1	0	0	0	0
GH68	0	0	0	0	0	0	0	0	0	0	0	0	0	0	0	0	0	0	0	0	0	0	0	0	0	0	0	0	0	0	0	0	0	0	0	0	0	0	0	0	0	0	0	0	0	0	0	0	0
GH71	0	0	0	0	0	0	0	0	0	0	0	0	0	0	0	0	0	0	0	0	0	0	0	0	0	0	0	0	0	0	0	0	0	0	0	0	0	0	0	0	0	0	0	0	0	0	0	0	0
GH73	1	3	1	1	1	0	1	1	1	1	1	1	1	1	1	1	1	1	1	1	2	1	1	1	1	1	1	1	1	1	1	1	1	1	1	1	1	1	1	1	1	1	1	1	1	1	1	1	1
GH74	0	0	0	0	0	0	0	0	0	0	0	0	0	0	0	0	0	0	0	0	0	0	0	0	0	0	0	0	0	0	0	0	0	0	0	0	0	0	0	0	0	0	0	0	0	0	0	0	0
GH76	0	0	1	0	0	0	0	0	0	0	0	0	0	0	0	0	0	0	0	0	0	0	0	0	0	0	0	0	0	0	0	0	0	0	0	0	0	0	0	0	0	0	0	0	0	0	0	0	0
GH77	0	0	0	0	0	0	0	0	0	0	0	0	0	0	0	1	0	0	0	0	0	0	0	0	0	1	0	0	0	0	0	0	0	1	1	0	0	0	0	0	0	0	0	1	1	0	0	0	0
GH78	3	0	1	4	0	1	0	0	0	0	0	0	0	0	0	0	0	0	0	0	0	1	0	0	0	0	0	0	0	1	0	0	0	0	0	0	0	4	0	0	0	0	0	0	0	0	0	0	0
GH79	0	0	0	0	0	0	0	0	0	0	0	0	0	0	0	0	0	0	0	0	0	0	0	0	0	0	0	0	0	0	0	0	0	0	0	0	0	0	0	0	0	0	0	0	0	0	0	0	0
GH81	0	0	0	0	0	0	0	0	0	0	0	0	0	0	0	0	0	0	0	0	0	0	0	0	0	0	0	0	1	1	0	0	0	0	0	0	0	0	0	0	0	0	1	0	0	0	0	0	0
GH82	0	0	0	0	0	0	0	0	0	1	2	0	0	0	0	0	0	0	0	0	0	0	0	0	0	0	0	0	0	0	0	0	0	0	0	0	0	0	0	0	0	0	0	0	0	0	0	0	0
GH84	0	0	1	0	0	0	0	0	0	0	0	0	0	0	0	0	0	0	0	0	0	0	0	0	0	0	0	0	0	0	1	0	0	0	0	0	0	0	0	0	0	0	0	0	0	0	0	0	0
GH85	0	0	0	0	0	0	0	0	0	0	0	0	0	0	0	0	0	0	0	0	0	0	0	0	0	0	0	0	0	0	0	0	0	0	0	0	0	0	0	0	0	0	0	0	0	0	0	0	0
GH86	0	0	0	0	0	0	0	0	0	1	1	0	0	0	0	0	0	9	0	0	0	0	0	0	0	0	0	0	0	0	0	0	0	0	0	0	0	0	0	0	0	0	0	0	0	0	0	0	0
GH87	1	0	0	0	0	0	0	0	0	0	0	0	0	0	0	0	0	0	0	0	0	0	0	0	0	0	0	0	0	0	0	0	0	0	0	0	0	0	0	0	0	0	0	0	0	0	0	0	0
GH88	2	0	1	0	0	0	0	0	0	0	0	0	0	0	0	0	0	0	2	0	0	1	0	0	0	0	0	0	0	1	0	0	0	0	0	0	0	1	2	0	0	0	0	0	0	0	0	0	0
GH89	1	0	1	0	0	0	0	0	0	0	0	0	0	0	0	0	0	0	0	0	0	0	0	0	0	0	0	0	0	0	1	0	0	0	0	0	0	1	0	0	0	0	0	0	0	0	1	0	0
GH92	7	4	9	0	0	6	0	0	1	0	2	2	1	0	0	0	1	0	3	2	0	2	0	1	3	1	0	1	2	2	8	0	0	0	0	1	1	5	6	1	1	0	4	1	0	2	1	1	2
GH93	0	0	0	0	0	0	0	0	0	0	0	0	0	0	0	0	0	0	0	0	0	0	0	0	0	0	0	0	0	0	0	0	0	0	0	0	0	0	0	0	0	0	0	0	0	0	0	0	0
GH94	0	0	0	0	0	0	0	0	0	0	0	0	0	0	0	1	0	0	0	0	0	0	0	1	0	0	0	0	0	0	0	0	0	0	0	0	0	0	0	0	0	0	0	0	0	0	0	0	0
GH95	3	1	2	0	0	0	0	0	0	0	0	0	0	0	0	0	0	0	2	0	0	3	0	0	0	0	0	0	0	2	1	0	0	0	1	3	0	4	4	0	0	0	1	1	0	0	6	0	0
GH96	0	0	0	0	0	0	0	0	0	0	0	0	0	0	0	0	0	0	0	0	0	0	0	0	0	0	0	0	0	0	0	0	0	0	0	0	0	0	0	0	0	0	0	0	0	0	0	0	0
GH97	8	3	6	0	2	3	0	2	1	0	0	0	0	0	0	1	1	0	1	0	1	5	1	1	1	1	1	1	3	3	0	1	1	2	3	0	0	7	8	1	1	1	2	3	2	0	0	0	0
GH98	0	0	0	0	0	0	0	0	0	0	0	0	0	0	0	0	0	0	0	0	0	0	0	0	0	0	0	0	0	0	0	0	0	0	0	0	0	0	0	0	0	0	0	0	0	0	0	0	0
GH99	1	0	0	0	0	0	0	0	0	0	0	0	0	0	0	0	0	0	0	0	0	0	0	0	0	0	0	0	1	0	0	0	0	0	0	0	0	0	1	0	0	0	0	0	0	0	0	0	0
GH101	0	0	0	0	0	0	0	0	0	0	0	0	0	0	0	0	0	0	0	0	0	0	0	0	0	0	0	0	0	0	0	0	0	0	0	0	0	0	0	0	0	0	0	0	0	0	0	0	0
GH103	0	0	0	0	0	0	0	0	0	0	0	0	0	0	0	0	0	0	0	0	0	0	0	0	0	0	0	0	0	0	0	0	0	0	0	0	0	0	0	0	0	0	0	0	0	0	0	0	0
GH104	0	0	0	0	0	0	0	0	0	0	0	0	0	0	0	0	0	0	0	0	0	0	0	0	0	0	0	1	0	0	0	0	0	0	0	0	0	0	0	0	0	0	0	2	0	0	0	0	0
GH105	4	0	0	0	0	4	0	0	0	0	0	0	0	0	0	0	1	0	2	0	0	3	0	0	0	1	0	0	1	0	0	0	1	1	1	0	0	4	4	0	0	0	0	3	0	0	1	0	0
GH106	2	0	0	1	0	1	0	0	0	0	0	0	0	0	1	0	0	0	0	0	0	2	0	0	0	0	0	0	0	0	0	0	0	0	0	1	0	2	1	0	0	0	0	1	0	0	0	0	0
GH107	0	0	0	0	0	0	0	0	0	0	0	0	0	0	0	0	0	0	0	0	0	0	0	0	0	0	0	0	0	0	0	0	0	0	0	0	0	0	0	0	0	0	0	0	0	0	0	0	0
GH108	0	0	0	0	0	0	0	0	0	0	0	0	0	0	0	0	0	0	0	0	0	0	0	0	0	0	0	0	0	0	0	0	0	0	0	0	0	0	0	0	0	0	0	0	0	0	0	0	0
GH109	0	1	1	1	0	1	0	0	0	0	0	0	0	1	0	0	0	0	1	0	0	0	0	2	1	0	0	0	0	0	2	0	0	0	0	2	0	0	1	0	0	0	3	0	0	1	2	0	1
GH110	0	1	0	0	0	0	0	0	0	0	0	0	0	0	0	0	0	2	0	0	0	0	0	0	0	0	0	0	0	0	0	0	0	0	0	0	0	0	1	0	0	0	4	0	0	0	1	0	0
GH111	0	0	0	0	0	0	0	0	0	0	0	0	0	0	0	0	0	0	0	0	0	0	0	0	0	0	0	0	0	0	1	0	0	0	0	0	0	0	0	0	0	0	0	0	0	0	0	0	0
GH113	0	0	1	1	1	1	1	1	1	1	1	0	1	1	0	1	0	1	1	1	0	0	1	1	0	0	1	0	0	0	1	1	1	0	0	1	1	0	0	0	1	1	0	0	0	1	1	0	1
GH114	0	0	0	0	0	0	0	0	0	1	0	0	0	0	0	0	0	0	0	1	0	0	0	0	0	0	0	0	0	0	0	0	0	0	0	0	0	0	0	0	0	0	0	0	0	0	0	0	0
GH115	1	0	1	0	0	1	0	0	0	0	0	0	0	0	0	0	0	0	0	0	0	0	0	0	0	0	0	0	3	1	0	0	0	1	1	0	0	2	2	0	0	0	0	1	1	0	0	0	0
GH116	0	0	0	0	0	0	0	0	0	0	0	0	0	0	0	0	0	0	0	0	0	0	0	0	0	0	0	0	0	0	0	0	0	0	0	0	0	0	0	0	0	0	0	0	0	0	2	0	0
GH117	1	0	0	0	1	0	0	0	0	2	2	0	0	0	0	0	0	3	2	0	0	0	0	0	0	0	0	0	0	0	0	0	0	0	0	1	0	1	0	0	0	0	0	1	0	0	2	0	0
GH119	0	0	0	0	0	0	0	0	0	0	0	0	0	0	0	0	0	0	0	0	0	0	0	0	0	0	0	0	0	0	0	0	0	0	0	0	0	0	0	0	0	0	0	0	0	0	0	0	0
GH120	0	0	0	0	0	0	0	0	0	0	0	0	0	0	0	0	0	0	0	0	0	0	0	0	0	0	0	0	0	0	0	0	0	0	0	0	0	0	0	0	0	0	0	0	0	0	0	0	0
GH123	0	0	0	0	0	0	0	0	0	0	0	0	0	0	0	0	0	0	0	0	0	0	0	0	0	0	0	0	0	0	1	0	0	0	0	0	0	0	0	0	0	0	0	0	0	0	1	0	0
GH125	1	0	1	0	0	1	0	0	0	0	0	0	0	0	0	0	0	0	1	0	0	0	0	0	0	0	0	0	0	0	1	0	0	0	0	0	0	0	1	0	0	0	0	0	0	0	0	0	0
GH127	1	0	0	0	0	0	0	0	0	2	1	0	0	1	0	0	0	0	1	0	0	1	0	1	0	0	0	0	0	1	0	0	0	0	0	0	0	2	1	0	0	0	0	0	0	0	0	0	0
GH128	0	0	0	0	0	0	0	0	0	0	0	0	0	0	0	0	0	0	0	0	0	0	0	0	0	0	0	0	0	0	0	0	0	0	0	0	0	0	1	0	0	0	0	0	0	0	0	0	0
GH129	0	0	0	0	0	0	0	0	0	0	1	0	0	0	0	0	0	0	0	0	0	0	0	0	0	0	0	0	0	0	0	0	0	0	0	0	0	0	0	0	0	0	0	0	0	0	0	0	0
GH130	5	1	4	1	0	1	0	0	0	1	1	0	0	1	0	3	0	0	0	0	0	3	0	2	0	0	0	0	3	3	5	1	0	1	1	0	0	2	5	0	0	2	1	1	1	2	1	0	0
GH133	0	1	0	0	0	0	0	0	0	0	0	0	0	0	0	0	0	1	0	0	0	0	0	0	0	0	0	0	0	0	0	0	0	0	0	0	0	0	0	0	0	0	0	0	0	0	0	0	0
GH135	0	0	0	0	0	0	0	0	0	0	0	0	0	0	0	0	0	0	0	0	0	0	0	0	0	0	0	0	0	0	0	0	0	0	0	0	0	0	0	0	0	0	0	0	0	0	0	0	0
GH136	0	0	0	0	0	0	0	0	0	0	0	0	0	0	0	0	0	0	0	0	0	0	0	0	0	0	0	0	0	0	0	0	1	0	0	0	0	0	0	0	0	0	0	0	0	0	0	0	0
GH137	1	0	0	0	0	0	0	0	0	0	0	0	0	0	0	0	0	0	0	0	0	0	0	0	0	0	0	0	0	0	0	0	0	0	0	0	0	1	0	0	0	0	0	0	0	0	0	0	0
GH138	1	0	0	0	0	0	0	0	0	0	0	0	0	0	0	0	0	0	0	0	0	0	0	0	0	0	0	0	0	0	0	0	0	0	0	0	0	1	0	0	0	0	0	0	0	0	0	0	0
GH139	1	0	0	0	0	0	0	0	0	0	0	0	0	0	0	0	0	0	0	0	0	0	0	0	0	0	0	0	0	0	1	0	0	0	0	1	0	1	0	0	0	0	0	0	0	0	3	0	0
GH140	1	0	0	0	0	1	0	0	0	0	0	0	0	0	0	0	0	0	0	0	0	0	0	0	0	0	0	0	0	0	0	1	0	0	0	0	0	1	0	0	0	0	0	0	0	0	0	0	0
GH141	1	0	0	0	0	0	0	0	0	0	0	0	0	0	0	0	0	0	0	0	0	0	0	0	0	0	0	0	0	0	0	0	0	0	0	1	0	1	0	0	0	0	0	0	0	0	1	0	0
GH142	1	0	0	0	0	0	0	0	0	0	0	0	0	0	0	0	0	0	0	0	0	0	0	0	0	0	0	0	0	0	0	0	0	0	0	0	0	1	0	0	0	0	0	0	0	0	0	0	0
GH143	1	0	0	0	0	0	0	0	0	0	0	0	0	0	0	0	0	0	0	0	0	0	0	0	0	0	0	0	0	0	0	0	0	0	0	0	0	1	0	0	0	0	0	0	0	0	0	0	0
GH144	1	1	1	2	2	2	0	0	2	2	2	0	0	2	0	2	0	0	1	0	1	0	0	1	1	0	1	0	1	1	2	2	2	2	0	0	0	3	1	1	0	1	2	3	1	0	2	0	0
GH146	1	0	4	0	1	2	0	0	0	0	0	0	0	2	0	0	0	0	2	0	0	1	0	0	0	0	0	0	1	0	0	0	0	0	1	0	0	4	0	0	0	0	0	1	0	0	0	0	0
GH147	0	0	0	0	1	0	0	0	0	0	0	0	0	0	0	0	0	0	0	0	0	0	0	0	0	0	0	0	0	0	0	1	1	1	1	0	0	0	0	0	0	0	0	0	0	0	0	0	0
GH148	0	0	0	0	0	0	0	0	0	0	0	0	0	0	0	0	0	0	0	0	0	0	0	0	0	0	0	0	0	0	0	0	0	0	0	0	0	0	0	0	0	0	0	0	0	0	0	0	0
GH149	0	0	0	0	0	0	1	1	1	0	0	0	0	0	0	0	0	0	0	0	0	0	1	1	0	0	0	1	0	0	0	0	0	0	0	0	1	0	0	1	0	0	1	0	0	0	0	0	0
GH150	0	0	0	0	0	0	0	0	0	0	0	0	0	0	0	0	0	0	0	0	0	0	0	0	0	0	0	0	0	0	0	0	0	0	0	0	0	0	0	0	0	0	0	0	0	0	0	0	0
GH151	0	0	0	0	0	0	0	0	0	0	0	0	0	0	0	0	0	0	0	0	0	0	0	0	0	0	0	0	0	0	0	0	0	0	0	0	0	0	0	0	0	0	0	0	0	0	0	0	0
GH154	0	0	1	0	0	1	0	0	0	0	0	0	0	0	0	0	0	0	1	0	0	0	0	0	0	0	0	0	0	1	2	0	0	0	0	0	0	2	2	0	0	0	0	0	0	0	0	0	0
GH156	0	0	0	0	0	0	0	0	0	0	0	0	0	0	0	0	0	0	0	0	0	0	0	0	0	0	0	0	0	0	0	0	0	0	0	0	0	0	0	0	0	0	0	0	0	0	0	0	0
GH157	0	0	0	0	0	0	0	0	0	0	0	0	0	0	0	0	0	0	0	0	0	0	0	0	0	0	0	0	0	0	0	0	0	0	0	0	0	0	0	0	0	0	0	0	0	0	0	0	0
GH158	0	0	0	0	0	0	0	0	1	0	0	0	0	0	0	0	0	0	0	0	0	0	0	1	0	0	0	0	0	0	0	0	0	0	0	0	0	0	0	0	0	0	0	0	0	0	0	0	0
GH159	0	0	0	0	0	0	0	0	0	0	0	0	0	0	0	0	0	0	1	0	0	0	0	0	0	0	0	0	0	0	0	0	0	0	0	0	0	0	1	0	0	0	0	0	0	0	0	0	0
GH160	0	0	0	0	0	0	0	0	0	0	0	0	0	0	0	0	0	0	0	0	0	0	0	0	0	0	0	0	0	0	0	0	0	0	0	0	0	0	0	0	0	0	0	0	0	0	0	0	0
GH163	0	0	0	0	0	0	0	0	0	0	0	0	0	0	0	0	0	0	0	0	0	0	0	0	0	1	0	0	1	0	0	0	0	0	0	2	0	0	1	0	0	0	0	0	0	0	1	0	0
GH164	0	1	0	0	0	0	0	0	0	0	0	0	0	0	0	0	0	0	0	0	0	0	0	0	0	0	0	0	0	0	0	0	0	0	0	0	0	0	0	0	0	0	0	0	0	0	0	0	0
GH165	0	0	0	0	0	0	0	0	0	0	0	0	0	0	0	0	0	0	0	0	0	0	0	0	0	0	0	0	0	0	0	0	0	0	0	0	0	0	0	0	0	0	0	0	0	0	0	0	0
GH166	0	0	0	0	0	0	0	0	0	0	0	0	0	0	0	1	0	0	0	0	0	0	0	0	0	0	0	0	0	0	0	0	0	0	0	0	0	0	0	0	0	0	0	0	0	0	0	1	0
GH167	0	0	0	0	0	0	0	0	0	0	0	0	0	0	0	0	0	3	0	0	0	0	0	0	0	0	0	0	0	0	0	0	0	0	0	0	0	0	0	0	0	0	0	0	0	0	0	0	0
GH168	0	0	0	0	0	0	0	0	0	0	0	0	0	0	0	0	0	0	0	0	0	0	0	0	0	0	0	0	0	0	0	0	0	0	0	0	0	0	0	0	0	0	0	0	0	0	0	0	0
GH171	2	1	1	1	1	1	1	2	1	1	1	1	1	1	1	1	1	1	2	1	1	1	1	1	1	1	1	1	1	1	4	1	2	1	3	1	1	0	1	1	1	1	1	1	1	1	1	1	1
GH172	0	0	1	0	0	0	0	0	0	0	0	0	0	0	0	0	0	0	0	0	0	0	0	0	0	0	0	0	0	0	1	0	0	0	0	0	0	0	0	0	0	0	0	0	0	0	1	0	0
GH173	0	0	0	0	0	0	0	0	0	2	2	0	0	0	0	0	0	0	0	0	0	0	0	0	0	0	0	0	0	0	0	0	0	0	0	0	0	0	0	0	0	0	0	0	0	0	0	0	0
GT0	3	1	5	0	4	3	1	1	3	0	3	1	4	0	0	5	3	1	2	4	1	2	0	0	0	2	3	3	3	1	2	2	3	3	6	0	3	1	4	3	1	0	2	0	1	3	0	4	0
GT1	0	0	1	1	0	0	0	0	0	1	0	0	0	0	1	0	0	1	0	0	0	1	0	0	1	0	0	0	0	1	0	0	0	1	0	0	0	1	0	0	0	1	0	1	1	0	0	0	1
GT2	25	10	20	15	24	22	6	17	25	18	15	11	18	12	20	25	20	16	11	22	11	12	19	16	16	22	24	21	22	16	23	20	26	18	18	15	18	18	25	15	24	12	16	18	19	24	14	14	10
GT3	0	1	0	0	0	0	0	0	0	0	0	0	0	0	0	0	0	0	0	0	0	0	0	0	0	0	0	0	0	0	0	0	0	0	0	0	0	0	0	0	0	0	0	0	0	0	0	0	0
GT4	18	10	14	9	14	13	6	8	12	13	5	10	13	7	13	24	21	14	5	17	11	12	14	10	11	15	9	13	14	10	20	18	19	18	18	7	15	9	15	11	6	6	16	15	18	10	10	13	8
GT5	2	1	2	2	2	2	2	2	1	2	1	1	1	2	1	1	2	2	2	1	1	1	1	1	1	2	1	1	2	1	2	2	2	2	2	2	1	2	2	2	1	2	2	2	2	1	2	1	1
GT6	0	0	0	0	0	0	0	0	0	0	0	0	0	0	0	0	0	0	0	0	0	0	0	0	0	0	0	0	0	0	0	0	0	0	0	0	0	0	0	0	0	0	0	0	0	0	0	0	0
GT8	0	0	0	0	0	0	0	0	0	0	0	0	0	0	0	0	0	0	0	0	0	0	0	0	0	0	0	0	0	1	0	0	0	0	0	0	0	0	0	0	0	0	0	0	0	0	0	0	0
GT9	3	1	2	0	2	2	1	3	2	1	1	2	2	1	1	2	1	2	1	2	0	3	2	2	3	0	2	3	3	4	1	2	2	2	2	2	2	2	3	2	2	3	3	3	2	2	2	2	0
GT10	0	0	0	0	0	0	0	0	0	0	0	0	0	0	0	1	0	0	0	0	0	0	0	0	0	0	0	0	0	0	0	0	1	0	0	0	0	0	0	0	0	0	0	0	0	0	0	0	0
GT11	0	0	0	0	1	0	0	0	0	0	0	0	0	0	0	1	0	0	0	0	0	0	0	0	0	0	0	0	0	0	0	0	0	0	0	0	0	0	0	0	0	0	0	0	0	0	0	0	0
GT14	0	0	0	0	0	0	0	0	0	0	0	0	0	1	1	0	0	0	0	0	0	0	0	0	1	0	0	0	0	0	0	0	0	0	0	0	0	1	0	0	0	0	0	0	0	0	0	0	0
GT17	0	0	0	0	0	0	0	0	0	0	0	0	0	0	0	0	0	0	0	0	0	0	0	0	0	0	0	0	0	0	0	0	0	0	0	0	0	0	0	0	0	0	0	0	0	0	0	0	0
GT19	1	1	1	1	1	1	1	1	1	1	1	1	1	1	1	1	1	1	1	1	1	1	1	1	1	1	1	1	1	1	1	1	1	1	1	1	1	1	1	1	1	1	1	1	1	1	1	1	1
GT20	0	0	1	1	1	1	0	1	0	1	1	0	0	1	0	1	0	0	1	0	0	1	1	1	0	0	1	0	0	1	0	1	1	1	1	1	1	1	0	0	0	1	0	0	0	0	1	0	0
GT22	0	0	0	0	0	0	0	0	0	0	0	3	1	0	0	0	0	0	0	0	0	0	0	0	0	0	0	0	0	0	0	0	0	0	0	0	0	0	0	0	0	0	0	0	0	0	0	0	0
GT23	0	0	0	0	0	0	0	0	0	0	0	0	0	0	0	0	0	0	0	0	0	0	0	0	0	0	0	0	0	0	0	0	0	0	0	0	0	0	0	0	0	0	0	0	0	0	0	0	0
GT25	0	0	0	0	0	0	0	0	0	0	0	0	0	0	0	0	0	0	0	0	0	0	0	0	1	0	0	0	0	0	0	0	0	0	0	0	0	0	0	0	0	0	0	0	0	0	0	0	0
GT26	0	0	0	0	0	0	0	0	0	0	1	0	0	0	0	1	1	1	0	1	0	0	0	1	0	0	0	1	0	0	0	0	0	0	0	1	1	0	0	1	0	0	0	0	0	1	0	0	0
GT28	1	1	1	1	1	1	1	1	1	1	1	1	1	1	1	1	1	1	1	1	1	1	1	1	1	1	1	1	1	1	1	1	1	1	1	1	1	1	1	1	1	1	1	1	1	1	1	1	1
GT30	1	1	1	1	1	1	1	0	1	0	1	1	1	1	1	1	1	1	0	1	1	1	0	1	1	1	1	1	1	1	0	1	1	1	1	0	0	1	1	1	1	1	1	1	1	1	0	1	1
GT32	0	0	0	0	0	0	0	0	0	0	0	0	0	0	0	0	0	1	1	0	0	0	0	0	1	1	1	0	0	0	0	0	0	0	0	0	1	0	0	0	0	0	0	1	0	0	0	0	0
GT35	0	1	0	1	0	0	0	0	0	0	0	0	0	0	0	1	0	0	0	0	0	0	0	1	0	1	0	0	0	0	0	0	0	1	1	0	0	0	0	0	0	0	0	1	1	0	0	0	0
GT41	0	0	0	0	0	0	0	0	0	0	0	0	0	0	0	0	0	0	0	0	0	0	0	0	0	0	0	0	0	0	0	0	0	0	0	0	0	0	0	0	0	0	0	0	0	0	0	0	0
GT47	0	0	0	0	0	0	0	0	0	0	0	0	0	0	0	0	0	0	0	0	0	0	0	0	0	0	0	0	0	0	0	0	0	0	0	0	0	0	0	0	0	0	0	0	0	0	0	0	0
GT51	4	3	3	2	3	3	1	3	2	4	3	2	2	2	2	4	3	3	4	3	2	4	2	2	2	2	3	3	4	4	4	3	3	3	3	3	4	3	4	3	4	3	3	2	2	3	3	4	3
GT55	0	0	0	0	0	0	0	0	0	0	0	0	0	0	0	0	0	0	0	0	0	0	0	0	0	0	0	0	0	0	0	0	0	0	0	0	0	0	0	0	0	0	0	0	0	0	0	0	0
GT56	0	0	0	0	0	0	0	0	0	0	0	0	0	0	0	0	0	0	0	0	0	0	0	0	0	0	0	0	0	0	0	0	0	0	0	0	0	0	0	0	0	0	0	0	0	0	0	0	0
GT60	0	0	0	0	0	0	0	0	0	0	0	0	0	0	0	0	0	0	0	0	0	0	0	0	0	0	0	0	0	0	0	0	0	0	0	0	0	0	0	0	0	0	0	0	0	0	0	0	0
GT61	0	0	0	0	0	0	0	0	0	0	0	0	0	0	0	0	0	0	0	0	0	0	0	0	0	0	0	0	0	0	0	0	0	0	0	0	0	0	0	0	0	0	0	0	0	0	0	0	0
GT70	0	0	0	0	0	0	0	0	0	0	0	0	0	0	0	0	0	0	0	0	0	0	0	0	0	0	0	0	0	0	0	0	0	0	0	0	0	0	0	0	0	0	0	0	0	0	0	0	0
GT74	0	0	0	0	0	0	0	0	0	0	0	0	0	0	0	0	0	0	0	0	0	0	0	0	0	0	0	0	0	0	0	0	0	0	0	0	0	0	0	0	0	0	0	0	0	0	0	0	0
GT81	0	0	0	0	0	0	0	0	0	0	0	0	0	0	0	0	0	0	0	0	0	0	0	0	0	0	0	0	0	0	0	0	0	0	0	0	0	0	0	0	0	0	0	0	0	0	0	0	0
GT83	0	0	2	1	2	2	0	1	1	1	1	0	1	1	0	1	0	0	2	1	0	0	0	1	0	0	1	0	0	0	0	1	1	1	1	1	1	1	0	0	0	0	0	0	0	1	2	0	0
GT84	0	0	0	0	0	0	0	0	0	0	0	0	0	0	0	1	0	0	0	0	0	0	0	0	0	0	0	0	0	0	0	0	0	0	0	0	0	0	0	0	0	0	0	0	0	0	0	0	0
GT89	0	0	0	0	0	0	0	0	0	0	0	0	0	0	0	0	0	0	0	0	0	0	0	0	0	0	0	0	0	0	0	0	0	0	0	0	0	0	0	0	0	0	0	0	0	0	0	0	0
GT94	0	0	0	0	0	0	0	0	0	0	0	0	0	0	0	0	0	0	0	0	0	0	0	0	0	0	0	0	0	0	0	0	0	0	0	0	0	0	0	0	0	0	0	0	0	0	0	0	0
GT100	0	0	0	0	0	0	0	0	0	0	0	0	0	0	0	0	0	0	0	0	0	0	0	0	0	0	0	0	0	0	0	0	0	0	0	0	0	0	0	0	0	0	0	0	0	0	0	0	0
GT101	0	0	0	0	0	0	0	0	0	0	0	0	0	0	0	0	0	0	0	0	0	0	0	0	0	0	0	0	0	0	0	0	0	0	0	0	0	0	0	0	0	0	0	0	0	0	0	0	0
GT105	0	0	0	0	0	0	0	0	0	0	0	0	0	0	0	0	0	0	0	0	0	0	0	0	0	0	0	0	0	0	0	0	0	0	0	0	0	0	0	0	0	0	0	0	0	0	0	0	0
GT111	0	0	0	0	0	0	0	0	0	0	0	0	0	0	0	0	0	0	0	0	0	0	0	0	0	0	0	0	0	0	0	0	0	0	0	0	0	0	0	0	0	0	0	0	0	0	0	0	0
GT113	0	0	0	0	0	0	0	0	0	0	0	0	0	1	0	0	0	0	0	0	0	0	0	0	0	0	0	0	0	0	0	0	0	0	0	0	0	0	0	0	0	0	0	0	0	0	0	0	0
PL0	0	0	0	0	0	0	0	0	0	0	0	0	0	0	0	0	0	0	0	0	0	0	0	0	0	0	0	0	0	0	0	0	0	0	0	0	0	0	0	0	0	0	0	0	0	0	0	0	0
PL1	7	0	0	0	0	0	0	0	0	0	0	0	0	1	0	0	0	0	2	0	0	0	0	0	0	2	0	0	1	0	2	0	0	1	1	0	1	6	2	0	0	0	0	4	1	0	0	0	0
PL2	0	0	0	0	0	0	0	0	0	0	0	0	0	0	0	0	0	0	0	0	0	0	0	0	0	0	0	0	0	0	0	0	0	0	0	0	0	0	0	0	0	0	0	0	0	0	0	0	0
PL4	0	0	0	0	0	1	0	0	0	0	0	0	0	0	0	0	0	0	0	0	0	0	0	0	0	0	0	0	0	0	0	0	0	0	0	0	0	1	0	0	0	0	0	0	0	0	0	0	0
PL6	0	0	0	0	1	0	0	0	0	2	1	0	1	0	1	0	0	0	0	0	0	0	0	0	0	0	0	0	0	0	0	1	0	0	0	0	0	0	0	0	1	1	0	0	0	0	0	0	0
PL7	0	0	0	0	4	0	0	0	3	4	2	0	3	0	0	0	0	0	0	0	0	0	0	0	0	0	0	0	0	0	0	2	0	0	0	0	0	0	0	0	2	1	0	0	0	0	0	0	0
PL8	0	0	0	0	0	0	0	0	0	0	0	0	0	0	0	0	0	0	0	0	0	0	0	0	0	0	0	0	0	0	0	0	0	0	0	0	0	0	0	0	0	0	0	0	0	0	0	0	0
PL9	0	0	0	0	0	0	0	0	0	0	0	0	0	0	0	0	0	0	0	0	0	0	0	0	0	0	0	0	0	0	0	0	2	1	1	0	0	2	0	0	0	0	0	0	0	0	0	0	0
PL10	2	0	0	0	0	1	0	0	0	0	0	0	0	0	0	0	1	0	1	0	0	0	0	0	0	0	0	0	1	0	0	0	1	1	1	1	0	2	1	0	0	0	0	0	1	0	0	0	0
PL11	1	0	0	0	0	2	0	0	0	0	0	0	0	0	0	0	0	0	1	0	0	1	0	0	0	0	0	0	0	0	0	0	0	0	0	0	0	3	1	0	0	0	0	2	0	0	0	0	0
PL12	0	0	0	0	0	0	0	0	2	1	0	0	0	0	0	0	1	0	0	0	0	0	0	0	0	0	0	0	0	0	0	1	0	0	0	0	0	0	0	0	0	1	0	0	0	0	1	0	0
PL13	0	0	0	0	0	0	0	0	0	0	0	0	0	0	0	0	0	0	0	0	0	0	0	0	0	0	0	0	0	0	0	0	0	0	0	0	0	0	0	0	0	0	0	0	0	0	0	0	0
PL14	0	0	0	0	0	0	0	0	0	0	0	0	0	0	0	0	0	0	0	0	0	0	0	0	0	0	0	0	0	0	0	0	0	0	0	0	0	0	0	0	0	0	0	0	0	0	0	0	0
PL15	0	0	0	0	0	0	0	0	0	0	0	0	0	0	0	0	0	0	0	0	0	0	0	0	0	0	0	0	0	0	0	0	0	0	0	0	0	0	0	0	0	0	0	0	0	0	0	0	0
PL17	0	0	0	0	1	0	0	0	0	1	1	0	1	0	1	0	0	0	0	0	0	0	0	0	0	0	0	0	0	0	0	1	0	0	0	0	0	0	0	0	1	1	0	0	0	0	0	0	0
PL21	0	0	0	0	0	0	0	0	0	0	0	0	0	0	0	0	0	0	0	0	0	0	0	0	0	0	0	0	0	0	0	0	0	0	0	0	0	0	0	0	0	0	0	0	0	0	0	0	0
PL22	0	0	0	0	0	0	0	0	0	0	0	0	0	0	0	0	0	0	0	0	0	0	0	0	0	0	0	0	0	0	0	0	0	0	0	0	0	1	0	0	0	0	0	0	0	0	0	0	0
PL24	0	0	0	0	0	0	0	0	0	0	0	0	0	0	0	0	0	0	0	0	0	0	0	0	0	0	0	0	0	0	0	0	0	0	0	0	0	0	0	0	0	0	0	0	0	0	0	0	0
PL25	0	0	0	0	0	0	0	0	0	0	0	0	0	0	0	0	0	0	0	0	0	0	0	0	0	0	0	0	0	0	0	0	0	0	0	0	0	0	0	0	0	0	0	0	0	0	0	0	0
PL26	0	0	0	0	0	0	0	0	0	0	0	0	0	0	0	0	0	0	0	0	0	0	0	0	0	0	0	0	0	0	0	0	0	0	0	0	0	0	0	0	0	0	0	0	0	0	0	0	0
PL27	0	0	0	0	0	0	0	0	0	0	0	0	0	0	0	0	0	0	0	0	0	0	0	0	0	0	0	0	0	0	0	0	0	0	0	0	0	0	0	0	0	0	0	0	0	0	0	0	0
PL28	0	0	0	0	0	0	0	0	0	0	0	0	0	0	0	0	0	0	0	0	0	0	0	0	0	0	0	0	0	0	0	0	0	0	0	0	0	0	0	0	0	0	0	0	0	0	0	0	0
PL29	1	0	0	0	0	0	0	0	0	0	0	0	0	0	0	0	0	1	0	0	0	0	0	0	0	0	0	0	0	0	0	0	0	0	0	0	0	0	1	0	0	0	0	0	0	0	0	0	0
PL30	0	0	0	0	0	0	0	0	0	0	0	0	0	0	0	0	0	0	0	0	0	0	0	0	0	0	0	0	0	0	0	0	0	0	0	0	0	0	0	0	0	0	0	0	0	0	0	0	0
PL31	0	0	0	0	0	0	0	0	0	0	1	0	0	0	0	0	0	0	0	0	0	0	0	0	0	0	0	0	0	0	0	0	0	0	0	0	0	0	0	0	0	0	0	0	0	0	0	0	0
PL33	0	0	0	0	0	0	0	0	0	0	0	0	0	0	0	0	0	0	0	0	0	0	0	0	0	0	0	0	0	0	0	0	0	0	0	0	0	0	0	0	0	0	0	0	0	0	0	0	0
PL34	0	0	0	0	0	0	0	0	0	0	0	0	0	0	0	0	0	0	0	0	0	0	0	0	0	0	0	0	0	0	0	0	0	0	0	0	0	0	0	0	0	0	0	0	0	0	0	0	0
PL35	0	0	0	0	0	0	0	0	0	0	0	0	0	0	0	0	0	0	0	0	0	0	0	0	0	0	0	0	0	0	0	0	0	0	0	0	0	0	0	0	0	0	0	0	0	0	0	0	0
PL36	1	0	0	0	0	0	0	0	0	0	0	0	0	0	0	0	0	0	0	0	0	0	0	0	0	0	0	0	0	0	0	0	0	0	0	0	0	0	1	0	0	0	0	0	0	0	0	0	0
PL37	0	0	0	0	0	0	0	0	0	0	0	0	0	0	0	0	0	0	0	0	0	0	0	0	0	0	0	0	0	0	0	0	0	0	0	0	0	0	0	0	0	0	0	0	0	0	0	0	0
PL38	0	0	0	0	0	0	0	0	0	0	0	0	0	0	0	0	0	0	0	0	0	0	0	0	0	0	0	0	0	0	0	0	0	0	0	0	0	0	0	0	0	1	0	0	0	0	0	0	0
PL40	0	0	0	0	0	0	0	0	0	0	0	0	0	0	0	0	0	0	0	0	0	0	0	0	0	0	0	0	0	0	0	0	0	0	0	0	0	1	0	0	0	0	0	0	0	0	0	0	0
PL42	0	0	1	0	0	1	0	0	0	0	0	0	0	0	0	0	0	0	1	0	0	0	0	0	0	0	0	0	0	1	0	0	0	0	0	0	0	1	1	0	0	0	0	0	0	0	0	0	0
[truncated: 653 more columns]

## Sheet: Supplementary Table 3
Supplementary Table 3: Differences in relative abundance of CAZyme classes between different orders, families, sources, and environment conditions.
Supplementay Table 3a Differences in relative abundance of CAZyme classes between different Orders
CAZyme class	Difference between means (Flavobacteriales VS Cytophagales)	95.0% lower CI	95.0% upper CI	p-values (corrected)
AA	-0.115203	-0.173218	-0.0571871	0.000112514
CBM	-3.30133	-3.85251	-2.75015	1.25706e-26
CE	-2.17877	-2.52596	-1.83157	1.89304e-29
GH	-5.61146	-7.43818	-3.78474	2.94277e-09
GT	10.9454	8.81595	13.0749	0
PL	0.261314	-0.13042	0.653048	0.190648
Supplementay Table 3b Differences in relative abundance of CAZyme classes between different Families
CAZyme class	Difference between means (Flavobacteriaceae VS Cyclobacteriaceae)	95.0% lower CI	95.0% upper CI	p-values (corrected)
AA	-0.210125	-0.307471	-0.112778	6.03702e-05
CBM	-2.85786	-3.51026	-2.20546	4.78048e-13
CE	-2.70396	-3.25814	-2.14978	1.34506e-14
GH	-4.48314	-6.61815	-2.34814	5.51653e-05
GT	10.0752	7.52543	12.625	1.22435e-12
PL	0.179884	-0.592585	0.952353	0.644113
CAZyme class	Difference between means (Flavobacteriaceae VS Cytophagaceae)	95.0% lower CI	95.0% upper CI	p-values (corrected)
AA	-0.310609	-0.43898	-0.182238	2.37923e-05
CBM	-4.05331	-5.22818	-2.87844	4.57754e-08
CE	-2.56876	-3.52432	-1.6132	4.6015e-06
GH	-3.33221	-6.27212	-0.392311	0.0271008
GT	9.30711	6.33134	12.2829	4.29293e-08
PL	0.957785	0.34797	1.5676	0.00262995
CAZyme class	Difference between means (Flavobacteriaceae VS Hymenobacteraceae)	95.0% lower CI	95.0% upper CI	p-values (corrected)
AA	0.0292953	-0.0132914	0.071882	0.175519
CBM	-2.19877	-3.05326	-1.34429	3.13623e-06
CE	-1.68629	-2.31057	-1.06201	1.18375e-06
GH	-4.24419	-7.18692	-1.30146	0.00523795
GT	7.27548	3.92185	10.6291	4.42496e-05
PL	0.824476	0.21789	1.43106	0.00826757
CAZyme class	Difference between means (Flavobacteriaceae VS Spirosomaceae)	95.0% lower CI	95.0% upper CI	p-values (corrected)
AA	-0.202117	-0.290393	-0.113841	3.4241e-05
CBM	-4.46573	-5.97085	-2.9606	4.93303e-07
CE	-2.80212	-3.27584	-2.3284	7.50837e-17
GH	-5.03901	-7.1414	-2.93661	5.86311e-06
GT	12.0202	10.0265	14.0139	0
PL	0.488783	-0.0519688	1.02953	0.0758689
CAZyme class	Difference between means (Flavobacteriaceae VS Weeksellaceae)	95.0% lower CI	95.0% upper CI	p-values (corrected)
AA	-0.258079	-0.387323	-0.128835	0.000152224
CBM	0.97084	0.414662	1.52702	0.000750877
CE	0.136625	-0.380348	0.653597	0.601384
GH	5.70742	2.90566	8.50918	9.32349e-05
GT	-7.8408	-11.2876	-4.39401	1.5284e-05
PL	1.28399	0.765102	1.80288	2.2635e-06
CAZyme class	Difference between means (Weeksellaceae VS Cyclobacteriaceae)	95.0% lower CI	95.0% upper CI	p-values (corrected)
AA	0.0479546	-0.10882	0.20473	0.546058
CBM	-3.8287	-4.59479	-3.06261	5.71036e-17
CE	-2.84058	-3.53867	-2.14249	6.66748e-13
GH	-10.1906	-13.0889	-7.29225	1.805e-10
GT	17.916	14.2964	21.5356	0
PL	-1.10411	-1.91641	-0.291801	0.00829434
CAZyme class	Difference between means (Weeksellaceae VS Cytophagaceae)	95.0% lower CI	95.0% upper CI	p-values (corrected)
AA	-0.0525298	-0.228989	0.12393	0.555656
CBM	-5.02415	-6.26181	-3.78649	3.01197e-10
CE	-2.70539	-3.74617	-1.6646	3.8174e-06
GH	-9.03964	-12.5538	-5.52543	1.98526e-06
GT	17.1479	13.2323	21.0636	7.41629e-14
PL	-0.326205	-0.985907	0.333497	0.327414
CAZyme class	Difference between means (Weeksellaceae VS Hymenobacteraceae)	95.0% lower CI	95.0% upper CI	p-values (corrected)
AA	0.287374	0.155981	0.418768	3.72633e-05
CBM	-3.16961	-4.11225	-2.22697	2.47051e-09
CE	-1.82291	-2.57683	-1.069	5.45461e-06
GH	-9.95161	-13.4749	-6.42836	1.52839e-07
GT	15.1163	10.906	19.3266	9.17955e-11
PL	-0.459515	-1.11692	0.197893	0.168653
CAZyme class	Difference between means (Weeksellaceae VS Spirosomaceae)	95.0% lower CI	95.0% upper CI	p-values (corrected)
AA	0.055962	-0.0952729	0.207197	0.465004
CBM	-5.43657	-6.99154	-3.8816	8.35602e-09
CE	-2.93875	-3.57508	-2.30242	4.23951e-15
GH	-10.7464	-13.6196	-7.87324	2.52048e-11
GT	19.861	16.5966	23.1253	0
PL	-0.795207	-1.39274	-0.197673	0.00963441
CAZyme class	Difference between means (Cyclobacteriaceae VS Cytophagaceae)	95.0% lower CI	95.0% upper CI	p-values (corrected)
AA	-0.100484	-0.255704	0.0547348	0.200482
CBM	-1.19545	-2.47468	0.0837742	0.0663167
CE	0.135195	-0.922223	1.19261	0.798324
GH	1.15093	-1.87829	4.18015	0.44951
GT	-0.768089	-3.94173	2.40555	0.630495
PL	0.777901	-0.0907025	1.6465	0.0785182
CAZyme class	Difference between means (Cyclobacteriaceae VS Hymenobacteraceae)	95.0% lower CI	95.0% upper CI	p-values (corrected)
AA	0.23942	0.139254	0.339586	1.04859e-05
CBM	0.659087	-0.33998	1.65815	0.193317
CE	1.01767	0.239508	1.79583	0.0109078
GH	0.238957	-2.79442	3.27233	0.875846
GT	-2.79972	-6.32963	0.730177	0.11852
PL	0.644591	-0.223449	1.51263	0.143706
CAZyme class	Difference between means (Cyclobacteriaceae VS Spirosomaceae)	95.0% lower CI	95.0% upper CI	p-values (corrected)
AA	0.00800739	-0.11725	0.133265	0.899206
CBM	-1.60787	-3.19596	-0.0197838	0.0473194
CE	-0.0981633	-0.76381	0.567484	0.770187
GH	-0.555863	-2.79044	1.67871	0.622264
GT	1.94499	-0.353844	4.24382	0.0961427
PL	0.308899	-0.515711	1.13351	0.458312
CAZyme class	Difference between means (Cytophagaceae VS Hymenobacteraceae)	95.0% lower CI	95.0% upper CI	p-values (corrected)
AA	0.339904	0.209485	0.470323	6.7103e-06
CBM	1.85454	0.469034	3.24004	0.00956455
CE	0.882474	-0.210363	1.97531	0.11129
GH	-0.911972	-4.53257	2.70863	0.61725
GT	-2.03164	-5.86353	1.80026	0.294425
PL	-0.13331	-0.8613	0.594681	0.716244
CAZyme class	Difference between means (Cytophagaceae VS Spirosomaceae)	95.0% lower CI	95.0% upper CI	p-values (corrected)
AA	0.108492	-0.0412649	0.258249	0.152205
CBM	-0.412417	-2.25494	1.43011	0.656373
CE	-0.233359	-1.25322	0.786507	0.646765
GH	-1.70679	-4.71272	1.29913	0.259633
GT	2.71308	-0.0564963	5.48265	0.0546472
PL	-0.469002	-1.14451	0.206509	0.170168
CAZyme class	Difference between means (Hymenobacteraceae VS Spirosomaceae)	95.0% lower CI	95.0% upper CI	p-values (corrected)
AA	-0.231412	-0.322749	-0.140076	5.50227e-06
CBM	-2.26696	-3.941	-0.592911	0.0088044
CE	-1.11583	-1.83981	-0.39186	0.00293608
GH	-0.79482	-3.8044	2.21476	0.60044
GT	4.74471	1.57617	7.91326	0.00395317
PL	-0.335693	-1.00908	0.337699	0.324408
Supplementay Table 3c Differences in relative abundance of CAZyme classes between different sources
CAZyme class	Difference between means (land VS marine)	95.0% lower CI	95.0% upper CI	p-values (corrected)
AA	0.0469875	-0.0179977	0.111973	0.155852
CBM	0.224875	-0.380849	0.8306	0.465766
CE	0.868039	0.462582	1.27349	3.28516e-05
GH	-1.59568	-4.08878	0.897429	0.208844
GT	1.53219	-1.45258	4.51696	0.313277
PL	-1.07642	-1.6056	-0.54723	8.17698e-05
CAZyme class	Difference between means (land VS tidal_flat)	95.0% lower CI	95.0% upper CI	p-values (corrected)
AA	0.0292658	-0.035045	0.0935766	0.37124
CBM	0.273724	-0.34228	0.889728	0.382631
CE	0.652514	0.202162	1.10287	0.00467435
GH	-0.837633	-3.33319	1.65792	0.509368
GT	1.65846	-1.30998	4.62689	0.272436
PL	-1.77633	-2.35707	-1.19559	7.19431e-09
CAZyme class	Difference between means (tidal_flat VS marine)	95.0% lower CI	95.0% upper CI	p-values (corrected)
AA	0.0177217	-0.0583421	0.0937855	0.647014
CBM	-0.0488485	-0.755426	0.657729	0.891901
CE	0.215525	-0.300162	0.731212	0.411533
GH	-0.758043	-3.74248	2.22639	0.617636
GT	-0.126266	-3.65496	3.40243	0.943924
PL	0.699912	-0.0193134	1.41914	0.0564383
Supplementay Table 3d Differences in relative abundance of CAZyme classes between different environment conditions
CAZyme class	Difference between means (normal VS extreme)	95.0% lower CI	95.0% upper CI	p-values (corrected)
AA	0.00449245	-0.0672224	0.0762073	0.901641
CBM	0.0763074	-0.664223	0.816838	0.838845
CE	0.04153	-0.418582	0.501642	0.858688
GH	-0.232612	-2.52886	2.06364	0.841772
GT	-0.731724	-3.69168	2.22823	0.62609
PL	0.842006	0.368519	1.31549	0.000567015

## Sheet: Supplementary Table 4a
Supplementary Table 4a: Relative abundance of CAZyme families across different orders, families, sources, and environment conditions.
CAZyme Family	Cytophagales	Flavobacteriales	Hymenobacteraceae	Weeksellaceae	Cytophagaceae	Flavobacteriaceae	Spirosomaceae	Cyclobacteriaceae	tidal flat	land	marine	extreme	normal
GT2	0.125792	0.157208	0.124538	0.19922	0.141198	0.149746	0.139308	0.123749	0.14407	0.145824	0.142794	0.153777	0.14326
GT4	0.0879336	0.106964	0.0965008	0.139662	0.0819431	0.101312	0.0795588	0.109155	0.100914	0.100564	0.0951961	0.111698	0.0973776
GH13	0.043816	0.0405341	0.0547707	0.0540962	0.0464433	0.038686	0.0472213	0.0255699	0.0378837	0.0446381	0.038599	0.0488941	0.0406544
GH3	0.0223479	0.0366109	0.0291241	0.0401821	0.0176164	0.0361299	0.0114573	0.0207454	0.0320985	0.0298001	0.032776	0.0331757	0.0305924
GH2	0.0234289	0.0285667	0.0240165	0.0110533	0.0177499	0.0313418	0.0173466	0.0199011	0.0296258	0.0234638	0.0312321	0.019196	0.0277574
GH43	0.0425591	0.0267535	0.0595523	0.0222367	0.0371013	0.0276983	0.0346932	0.047642	0.0266399	0.0384615	0.0254974	0.0376269	0.0322423
CBM50	0.0169683	0.0247424	0.020539	0.0187256	0.0146804	0.0256572	0.0130635	0.0248462	0.0216012	0.0219375	0.021042	0.023995	0.0212741
GT51	0.0193816	0.0230776	0.0280374	0.020026	0.0208194	0.0233299	0.0175608	0.0109758	0.0200149	0.0223102	0.0213949	0.0226735	0.0214368
GH16	0.0138009	0.0189401	0.00978048	0.00611183	0.00827439	0.0209073	0.00963701	0.0182125	0.0238406	0.0119094	0.0227624	0.015788	0.0170913
GH92	0.0127954	0.0179181	0.012606	0.020156	0.0121447	0.0176262	0.0130635	0.00832228	0.0134366	0.0159916	0.017954	0.0122409	0.0164988
GH29	0.0154098	0.0160554	0.00456423	0.0114434	0.0137462	0.0168631	0.0189528	0.019298	0.0195017	0.0115189	0.0229388	0.00848519	0.0170216
GT0	0.00869784	0.0149015	0.00978048	0.0126138	0.0117443	0.0152608	0.0102795	0.00385961	0.0117104	0.0128856	0.0120429	0.0125191	0.0124322
GH23	0.0174962	0.0148026	0.0131493	0.00702211	0.0204191	0.0156232	0.0126352	0.0259317	0.0189419	0.0140925	0.0173806	0.0175963	0.0155809
GT9	0.0108095	0.0132531	0.0151054	0.00793238	0.0166822	0.0138301	0.0118856	0.000120613	0.010684	0.013489	0.0108077	0.0134233	0.0120952
GT5	0.00477627	0.0132366	0.00434688	0.0184655	0.00413719	0.0124185	0.00374772	0.00639247	0.0104973	0.00887437	0.0118223	0.0103631	0.00980631
GH20	0.0162393	0.0130388	0.0143447	0.0083225	0.017483	0.0137728	0.0162758	0.0203835	0.0136232	0.0135778	0.016763	0.01238	0.0146281
GH97	0.00864756	0.0127751	0.0122799	0.0149545	0.00840785	0.0125901	0.00513974	0.00639247	0.00811794	0.0133471	0.00851383	0.0118932	0.0110147
GH5	0.0135998	0.0117201	0.012606	0.00702211	0.0149473	0.0125138	0.0108149	0.00989024	0.0130167	0.0123709	0.0121752	0.0121714	0.0125135
GH30	0.00708899	0.0106651	0.00793306	0.0149545	0.00640598	0.0101293	0.00760253	0.00506573	0.0072315	0.0106847	0.00758745	0.00855474	0.0093648
CBM6	0.0191302	0.0105662	0.0117366	0.010013	0.023622	0.0107398	0.0195952	0.0141117	0.0135766	0.0139505	0.0143368	0.0127973	0.0141518
GH31	0.00736551	0.0105333	0.00825907	0.00377113	0.00400374	0.0115791	0.00492558	0.00989024	0.0101708	0.00818217	0.0111606	0.0103631	0.00909756
CBM48	0.0167924	0.010286	0.0207564	0.0154746	0.0161484	0.00955706	0.0193811	0.0125437	0.0113371	0.0145185	0.0101901	0.0157185	0.0123857
GH28	0.00910005	0.00923102	0.0116279	0.00806242	0.00854131	0.00949983	0.00920869	0.00880473	0.00811794	0.010525	0.00683753	0.00799833	0.00937642
GH130	0.00646053	0.0090497	0.00380352	0.00754226	0.00880822	0.00934722	0.00878038	0.00434206	0.00685826	0.00903411	0.00661697	0.009598	0.0077614
CE4	0.00532931	0.00886838	0.00510759	0.0102731	0.00453757	0.00860326	0.0057822	0.00506573	0.00667164	0.00789819	0.00714632	0.00737237	0.00748254
GH73	0.000804424	0.00881892	0	0.0114434	0.000133458	0.00831712	0	0.000120613	0.00625175	0.00496965	0.00674931	0.00486855	0.00577457
GH171	0.00754148	0.00872002	0.00804173	0.00988296	0.00734018	0.00845065	0.00653175	0.00844289	0.00881777	0.00770296	0.0090873	0.00841563	0.00822615
CBM32	0.0113122	0.00825847	0.00532493	0.00884265	0.0132123	0.00825989	0.0139201	0.0138705	0.00835122	0.00985056	0.00957254	0.00667687	0.00993412
CE11	0.00502765	0.00824198	0.00532493	0.010013	0.00413719	0.00787837	0.00406896	0.00639247	0.00727816	0.00662028	0.00754334	0.00730282	0.00691322
GT19	0.00490196	0.00824198	0.00510759	0.010013	0.00400374	0.00787837	0.00406896	0.00639247	0.00727816	0.00656704	0.00745511	0.00723327	0.00686674
GT28	0.00515334	0.00819253	0.00532493	0.00988296	0.00440411	0.00784022	0.00417604	0.00639247	0.00737147	0.00665578	0.00745511	0.00730282	0.00693646
CE14	0.00651081	0.00811011	0.00597696	0.00689207	0.00533832	0.00816451	0.00663883	0.00904595	0.00797798	0.00699301	0.00820504	0.00820698	0.00735474
CE20	0.010005	0.00773098	0.0109759	0.00364109	0.00894168	0.0084125	0.0101724	0.00976963	0.00765139	0.00919385	0.00816092	0.00883294	0.00859795
GH0	0.0124937	0.0077145	0.0081504	0.0140442	0.0133458	0.00686735	0.0162758	0.0164033	0.00984417	0.00965532	0.00926375	0.0107804	0.00941127
GH78	0.00912519	0.00743427	0.00282547	0	0.0117443	0.00860326	0.0122069	0.0110964	0.010544	0.00626531	0.0103666	0.00486855	0.00864443
GT30	0.00417295	0.00741779	0.00402087	0.00962289	0.00360336	0.00700088	0.00278402	0.00578941	0.0062984	0.00585709	0.00666108	0.00646822	0.00607666
PL1	0.00605832	0.00692327	0.00858509	0.00845254	0.00266916	0.00677197	0.00235571	0.0107345	0.00508538	0.00743673	0.00586704	0.00646822	0.00659951
GH65	0.0034188	0.00674194	0.00391219	0.00156047	0.00520486	0.007535	0.00428311	0.000482451	0.00569189	0.00489865	0.00648463	0.00730282	0.0051123
GH105	0.00849673	0.00672546	0.00999783	0.00598179	0.0118778	0.0069055	0.00728129	0.00651309	0.00653168	0.00827092	0.00617583	0.00653777	0.00757549
GH95	0.00975365	0.00593423	0.00630298	0.00325098	0.00934205	0.00639045	0.0144555	0.0103727	0.0057852	0.00802243	0.00758745	0.00591181	0.0077033
GH144	0.0052539	0.00590126	0.00358618	0.0102731	0.00373682	0.00532219	0.00610344	0.00747799	0.00522534	0.00534237	0.00679342	0.00577271	0.00562353
GH117	0.00339367	0.00557158	0.000760704	0.00195059	0.00120112	0.00616154	0.00235571	0.00687492	0.00844453	0.00140215	0.00939609	0.00180832	0.00519363
GH18	0.00563097	0.00547268	0.00239078	0.0120936	0.00693981	0.00454008	0.00642467	0.00591002	0.00424559	0.00678002	0.00366139	0.00431214	0.00573971
PL7	0.000980392	0.00515948	0.000108672	0.000910273	0	0.00581817	0.000214156	0	0.00713819	0.00101168	0.00626406	0.00166922	0.00381098
GH10	0.00887381	0.00496167	0.00869376	0.00260078	0.0100093	0.00534127	0.00706714	0.0110964	0.00657833	0.00708175	0.00502889	0.00841563	0.00619285
GH17	0.000904977	0.00479684	0	0.000390117	0	0.0054748	0	0.00398022	0.00592517	0.00189912	0.00410252	0.0052163	0.00292795
GH32	0.00487682	0.00469793	0.00358618	0.00130039	0.00547177	0.00524589	0.00546097	0.00687492	0.00480545	0.00475666	0.00476422	0.00542495	0.00465916
GT83	0.00580694	0.00456606	0.00499891	0.00169051	0.00854131	0.00497883	0.00503266	0.00651309	0.00681161	0.00383373	0.00644051	0.0045208	0.00514715
GH109	0.00563097	0.00456606	0.00206477	0.00494148	0.00520486	0.00455915	0.00845915	0.00783983	0.0057852	0.00445494	0.00555825	0.00410349	0.00513553
CE12	0.00635998	0.00450012	0.0106499	0.00793238	0.00427065	0.0040441	0.00417604	0.00735738	0.00438556	0.00603457	0.00405841	0.0052163	0.0052401
CE8	0.00507793	0.00446716	0.0104325	0.00676203	0.00280262	0.00417764	0.00278402	0.00434206	0.0038257	0.00582159	0.00277913	0.00486855	0.0046824
GH88	0.00573152	0.00430232	0.0034775	0.00104031	0.00707327	0.00482622	0.0067459	0.0066337	0.00499207	0.00477441	0.00498478	0.00340798	0.0051123
GH113	0.002363	0.00426935	0.0027168	0.000130039	0.00146804	0.00488345	0.00139201	0.00434206	0.00569189	0.00159739	0.00621995	0.00382529	0.00346242
GH33	0.0106838	0.0042199	0.00282547	0.000650195	0.00734018	0.00478807	0.0155263	0.022434	0.00741812	0.00596358	0.00820504	0.00528585	0.00702941
GH26	0.00555556	0.00410451	0.00619431	0.000650195	0.00547177	0.00463546	0.00621052	0.0019298	0.00396566	0.00507614	0.0043672	0.0053554	0.00456621
PL6	0.000955254	0.0039067	0.000326016	0.000390117	0.000400374	0.0044447	0.000642467	0.000482451	0.00536531	0.00101168	0.00454365	0.00139101	0.00296281
GH106	0.00666164	0.00387373	0.00326016	0.00260078	0.0100093	0.00408226	0.00974408	0.0066337	0.0057852	0.00480991	0.00463188	0.00292113	0.00532144
GH25	0.00367019	0.00375835	0.00684634	0.00988296	0.0025357	0.00286139	0.00364065	0.00229164	0.00186619	0.00541337	0.00127928	0.0046599	0.00356699
GT1	0.00731523	0.00360999	0.00521626	0.0119636	0.00707327	0.00232727	0.00856623	0.00880473	0.00471214	0.00592808	0.00330848	0.00486855	0.0051123
GH51	0.0049271	0.00356054	0.00793306	0.00208062	0.00280262	0.00381519	0.00353357	0.00325654	0.0028926	0.00479216	0.00352905	0.00486855	0.00397365
CBM67	0.00532931	0.00352757	0.00184742	0	0.00667289	0.00408226	0.00835207	0.00422144	0.00513203	0.00342551	0.00542591	0.00243427	0.00454297
CE1	0.0122926	0.00334625	0.00597696	0.0029909	0.0188176	0.00339552	0.0168112	0.0121819	0.00597182	0.00821767	0.00445542	0.00632911	0.00698293
CBM9	0.00183509	0.00295063	0.00108672	0	0.00346991	0.0034146	0.00182032	0.000844289	0.0028926	0.00197011	0.00348494	0.00146056	0.00268396
GH27	0.00163399	0.00286821	0.00369485	0.00247074	0.00186841	0.00295677	0.000642467	0.000241225	0.00181954	0.0028753	0.0016763	0.00208652	0.00242834
CBM57	0.00681247	0.00273634	0.00706368	0.000260078	0.00106766	0.00310938	0.0140272	0.0056688	0.00443221	0.00427745	0.00445542	0.00619001	0.00404336
GH15	0.00409754	0.00268689	0.0073897	0	0.00226878	0.00309031	0.00139201	0.0047039	0.00429225	0.00221859	0.00480833	0.00410349	0.00310223
GH37	0.00346908	0.0026704	0.00478157	0.00494148	0.00400374	0.00236542	0.00449727	0.00144735	0.00219278	0.00358525	0.00224977	0.00417304	0.00278853
GT20	0.00432378	0.00263744	0.00532493	0	0.00440411	0.00303308	0.00278402	0.00482451	0.00410563	0.00250257	0.00454365	0.00396439	0.00319519
GH127	0.00452489	0.00255502	0.00336883	0	0.00360336	0.00295677	0.0077096	0.00265348	0.00326584	0.00347875	0.0030438	0.00208652	0.00354375
GH115	0.00279035	0.00255502	0.00499891	0.00312094	0.00240224	0.00249895	0.00149909	0.00253287	0.00251936	0.00299954	0.00189686	0.00292113	0.00260262
CBM13	0.0040724	0.00253853	0.00825907	0.00286086	0.00533832	0.00251803	0.00224863	0.00156797	0.00214612	0.0041887	0.00149985	0.00375574	0.00304414
GH146	0.00266466	0.00243963	0.00358618	0.00208062	0.00213533	0.00251803	0.00235571	0.00337716	0.00153961	0.00282205	0.00273501	0.00250383	0.00253291
GH1	0.00711413	0.00234072	0.0149967	0.0023407	0.00960897	0.00234634	0.00653175	0.000603064	0.00233274	0.00592808	0.00180864	0.0053554	0.00404336
PL10	0.00145802	0.0021594	0.00282547	0.00273082	0.000533832	0.00209836	0.00107078	0.00180919	0.0014463	0.00221859	0.00145573	0.00146056	0.00195197
GT35	0.00392157	0.00214292	0.00565095	0.0083225	0.00266916	0.00123994	0.00353357	0.00398022	0.00228609	0.00342551	0.00194098	0.00312978	0.00280014
GH53	0.00165913	0.00199456	0.00315149	0.000650195	0.000934205	0.00219374	0.000428311	0.000603064	0.00167957	0.00209435	0.00145573	0.00201697	0.00183578
GH19	0.000879839	0.00194511	0.000869376	0.00806242	0.000400374	0.00106825	0.00160617	0.000120613	0.000419894	0.00221859	0.000838149	0.00125191	0.00156855
GH125	0.002363	0.00187917	0.00293414	0.00494148	0.00200187	0.00144977	0.00374772	0.000723676	0.00111972	0.0028043	0.00114694	0.00201697	0.00207978
PL17	0.000628457	0.0018462	0.000217344	0.000260078	0.000133458	0.00207928	0.000321234	0.000482451	0.00293926	0.000408221	0.00224977	0.000834608	0.00145236
GH63	0.00057818	0.00182972	0.00152141	0.000520156	0	0.00204113	0.000214156	0	0.00214612	0.000656704	0.00224977	0.00111281	0.00137102
CBM47	0.00553042	0.00181324	0.000652032	0	0.00613906	0.00209836	0.0067459	0.011217	0.00424559	0.00260907	0.00405841	0.00333843	0.00327652
GH35	0.00208648	0.00181324	0.00434688	0.00247074	0.00173495	0.00173591	0.00139201	0.000361838	0.000979752	0.00266231	0.000970488	0.00111281	0.00205654
GH39	0.00331825	0.00178027	0.00163008	0.000390117	0.00547177	0.00200298	0.00567513	0.00132674	0.0019595	0.00278655	0.00180864	0.00208652	0.00243996
GT26	0.00299145	0.00176378	0.00358618	0.000130039	0.00333645	0.00200298	0.00182032	0.00385961	0.00251936	0.00186362	0.00295558	0.00271248	0.00217273
GH141	0.00228758	0.0017473	0.00054336	0.000780234	0.00240224	0.0019076	0.00428311	0.00253287	0.00177288	0.00177487	0.00260267	0.00111281	0.00210301
GH67	0.00387129	0.00173082	0.00499891	0.00247074	0.00320299	0.00164053	0.00342649	0.00506573	0.00228609	0.00308828	0.00158807	0.00312978	0.00248643
GT32	0.000326797	0.00173082	0.000217344	0.00819246	0.000266916	0.00080119	0.000428311	0.000603064	0.000513203	0.00154414	0.000882262	0.00097371	0.00120836
GH149	0.000402212	0.00171433	0	0.000130039	0	0.00194575	0	0.00180919	0.00223943	0.000745447	0.00132339	0.00173877	0.00110379
PL40	0.000553042	0.00169785	0.000108672	0	0	0.00196482	0.000535389	0.000482451	0.00247271	0.00028398	0.00247033	0.000417304	0.00138264
CE6	0.00339367	0.00163191	0.0019561	0.00208062	0.00480448	0.00156423	0.00353357	0.0047039	0.00205281	0.00246708	0.00224977	0.00201697	0.00238187
GH9	0.00761689	0.00156598	0.00619431	0	0.0101428	0.00181222	0.00835207	0.00554818	0.00377904	0.00456143	0.00264679	0.00403394	0.00395041
GH110	0.00113122	0.00151653	0	0	0.000133458	0.00175499	0.00149909	0.000964902	0.00242605	0.00085194	0.00163218	0.000904159	0.00144074
PL12	0.00196078	0.00150004	0.000326016	0.000520156	0.00120112	0.00165961	0.00439019	0.00205042	0.00223943	0.00136665	0.00194098	0.00111281	0.00177768
CE2	0.00165913	0.00150004	0.0034775	0.000260078	0.000934205	0.00169776	0.000214156	0	0.00139965	0.00179262	0.00114694	0.00194742	0.00149883
PL29	0.000175968	0.00145059	0	0	0.000133458	0.00167868	0	0.000120613	0.00177288	0.000621206	0.000970488	0.000486855	0.00102246
CBM35	0.00377074	0.00140114	0.00619431	0.000130039	0.00280262	0.00160238	0.00246279	0.00108551	0.0023794	0.00230734	0.00238211	0.00194742	0.0024051
GH36	0.00228758	0.00140114	0.00163008	0.000650195	0.00400374	0.00152608	0.00353357	0.000120613	0.00139965	0.00200561	0.00145573	0.00139101	0.00181254
CBM4	0.00100553	0.00135169	0.000434688	0	0.00106766	0.00156423	0.000856623	0.00168858	0.00125968	0.00104718	0.00158807	0.00153012	0.00116189
PL8	0.0017094	0.0012363	0.000434688	0.00182055	0.00160149	0.00116363	0.00182032	0.00373899	0.00163292	0.00118917	0.00180864	0.000904159	0.00151045
GH154	0.00226244	0.00121981	0.0027168	0.000520156	0.00280262	0.00133532	0.00214156	0.00217103	0.00172623	0.00170388	0.00136751	0.00097371	0.00174283
GH99	0.000226244	0.00121981	0.000108672	0.00247074	0.000266916	0.00104918	0	0	0.000419894	0.00108267	0.00057347	0.000556406	0.000871414
GH77	0.00296631	0.00120333	0.00532493	0.00845254	0.00413719	0.000152608	0.00256987	0	0.000653168	0.00285755	0.00070581	0.00215607	0.00185902
GT14	0.000779286	0.00115388	0.00119539	0.00585176	0.000266916	0.000457823	0.00128493	0.000482451	0.000559858	0.00147315	0.000264679	0.000834608	0.00103408
PL9	0.000377074	0.00113739	0.000326016	0.000260078	0.000266916	0.00127809	0.000214156	0.000120613	0.00111972	0.000745447	0.000794036	0.000695507	0.000859795
PL11	0.00163399	0.00108794	0.00304282	0.00221066	0.00120112	0.000934722	0.000963701	0.00205042	0.000933097	0.00170388	0.000661697	0.00159967	0.00125484
CBM20	0.00173454	0.00107146	0.00326016	0.00845254	0.000667289	0	0.00160617	0	0.000373239	0.00198786	0.000617583	0.00125191	0.00134779
GT11	0.00143288	0.00102201	0.000217344	0.000390117	0.00373682	0.00110641	0.00214156	0.000723676	0.000653168	0.00161514	0.000617583	0.00166922	0.00110379
CBM77	0.000100553	0.00102201	0.000326016	0.00130039	0	0.00099195	0	0	0.000373239	0.000905186	0.000308792	0.000556406	0.000673894
GH140	0.00530417	0.00100552	0.00282547	0.000130039	0.00547177	0.00114456	0.00845915	0.00615125	0.00233274	0.00312378	0.0020292	0.00215607	0.00280014
GH163	0.000377074	0.000989038	0.000108672	0.000390117	0.000400374	0.00106825	0.000321234	0.000964902	0.000606513	0.000656704	0.00110283	0.00104326	0.000697131
CBM91	0.00180995	0.000972554	0.0034775	0.0023407	0.000266916	0.000782114	0.000749545	0.00253287	0.00107306	0.00152639	0.000970488	0.00194742	0.00119674
CE9	0.0042735	0.00095607	0.00217344	0	0.00587215	0.00110641	0.00749545	0.00373899	0.0014463	0.0028753	0.00154396	0.00215607	0.00228891
GH8	0.00153343	0.00095607	0.00260813	0	0.00293607	0.00110641	0.000535389	0	0.000653168	0.00159739	0.000661697	0.00153012	0.00112703
CBM51	0.00530417	0.000939586	0.00249946	0.00130039	0.00680635	0.00089657	0.00803084	0.00542757	0.0023794	0.00291079	0.00233799	0.00222562	0.00274205
GH128	0.000553042	0.000939586	0.000326016	0	0.000133458	0.00108733	0	0.00132674	0.000839787	0.000834191	0.000617583	0.00132146	0.000697131
GH86	0.00168426	0.000923102	0	0	0	0.00106825	0.000321234	0.000241225	0.00233274	8.87437e-05	0.00299969	6.95507e-05	0.0014175
GH89	0.000377074	0.000906618	0.000217344	0.00104031	0.000266916	0.00089657	0.000963701	0	0.000513203	0.000727699	0.000794036	0.000347754	0.000755226
GH172	0.00108095	0.000857166	0.00152141	0	0.00133458	0.00099195	0.000321234	0.00108551	0.000746478	0.000727699	0.0016763	0.000904159	0.000952746
GH38	0.000653595	0.000857166	0	0.000260078	0.000800747	0.000953798	0.000535389	0.000241225	0.00121303	0.000390472	0.00132339	6.95507e-05	0.000894652
GH139	0.000980392	0.000840682	0.000652032	0	0.000800747	0.000972874	0.0019274	0.000964902	0.000513203	0.00104718	0.000882262	0.000417304	0.000975984
GH42	0.000703871	0.000824198	0.000978048	0	0.000533832	0.000953798	0.000428311	0	0.000279929	0.00111817	0.000397018	0.000486855	0.000824939
CE19	0.00241327	0.000774747	0.000978048	0	0.00280262	0.00089657	0.00406896	0.00313593	0.00116637	0.00168613	0.0010146	0.00111281	0.00147559
PL38	0.00218703	0.000774747	0.00228211	0	0.00346991	0.00089657	0.00171325	0.00217103	0.0019595	0.00113592	0.00123517	0.000486855	0.00147559
GH167	0.000276521	0.000758263	0	0	0	0.000877494	0.000107078	0	0.00139965	0.000124241	0.000882262	0.000208652	0.000627418
GH82	0.000502765	0.000708811	0.000108672	0	0	0.000820266	0	0.000120613	0.00102641	0.000177487	0.00136751	0.000417304	0.000662275
GH158	0.00243841	0.000692327	0.00499891	0	0.00160149	0.000782114	0.00160617	0.00205042	0.00149296	0.00143765	0.00114694	0.00187787	0.00130131
PL42	0.00110608	0.000675843	0.00184742	0	0	0.000782114	0.000642467	0.00180919	0.00102641	0.000692201	0.00105871	0.000695507	0.000871414
CBM26	0.000603318	0.000675843	0	0.000260078	0.000266916	0.000743962	0	0	0.000839787	0.000390472	0.00110283	0.000278203	0.00070875
GH24	0.000175968	0.000675843	0	0.00273082	0	0.000381519	0.000107078	0.000603064	0.000326584	0.000621206	0.000264679	0.000625956	0.000453135
PL24	0.000100553	0.000675843	0	0	0	0.000782114	0	0	0.000933097	8.87437e-05	0.000882262	0.000139101	0.000499611
GH116	0.000930116	0.000659359	0.000108672	0	0.00120112	0.000763038	0.00117786	0.000603064	0.000606513	0.000656704	0.00119105	0.000208652	0.000859795
GH168	7.54148e-05	0.000659359	0	0	0	0.000763038	0	0	0.000699823	7.0995e-05	0.00105871	0	0.000499611
CE15	0.00656109	0.000642875	0.00391219	0	0.00774056	0.000743962	0.00856623	0.00916657	0.00317253	0.00328352	0.00207332	0.00299068	0.00298605
GH50	0.00057818	0.000626391	0.000434688	0.000130039	0.000266916	0.000705811	0.000214156	0.000120613	0.000746478	0.000585709	0.000529357	0.000486855	0.000627418
PL37	0.000125691	0.000626391	0	0	0	0.000724886	0.000107078	0.000241225	0.00116637	3.54975e-05	0.00070581	0	0.000499611
PL28	2.51383e-05	0.000626391	0	0	0	0.000724886	0	0	0.00111972	5.32462e-05	0.000529357	0	0.000453135
GH76	0.00153343	0.000593423	0.00141274	0	0.00146804	0.000686735	0.00149909	0.00241225	0.000793132	0.00110042	0.000794036	0.00111281	0.000941127
GH143	0.0013826	0.000560455	0.000652032	0	0.00106766	0.000648583	0.00299818	0.00144735	0.000326584	0.00122466	0.00057347	0.000556406	0.000941127
GH137	0.00110608	0.000560455	0.00054336	0	0.000934205	0.000648583	0.00171325	0.00168858	0.000513203	0.000940684	0.000617583	0.000417304	0.000836558
GH123	0.000326797	0.000560455	0.00054336	0.000390117	0.000133458	0.000591355	0.000535389	0	0.000279929	0.000514714	0.000529357	0.000278203	0.000499611
GH150	0.000301659	0.000560455	0	0	0	0.000648583	0	0	0.00130634	8.87437e-05	0.00057347	0.000208652	0.000499611
GH147	0.00140774	0.000543971	0.00380352	0	0.000400374	0.000629507	0.000642467	0.000603064	0.000746478	0.000958432	0.000838149	0.00173877	0.000743607
GH142	0.00105581	0.000543971	0.000652032	0	0.00106766	0.000629507	0.00214156	0.000844289	0.000186619	0.00108267	0.000441131	0.000417304	0.000801701
GH138	0.000678733	0.000527487	0.00054336	0	0.000800747	0.000610431	0.00107078	0.000603064	0.000139965	0.00085194	0.000352905	0.000417304	0.000615799
GH64	0.000402212	0.000527487	0.000652032	0	0.000400374	0.000610431	0	0	0.000326584	0.000496965	0.00057347	0.000695507	0.000441516
CE7	0.002363	0.000494519	0.00108672	0	0.00320299	0.000572279	0.00364065	0.00229164	0.00102641	0.00136665	0.00110283	0.00097371	0.00127807
GT113	0	0.000478035	0	0	0	0.000553203	0	0	0.000373239	3.54975e-05	0.000838149	0.000139101	0.000313709
CBM38	0.00274007	0.000445067	0.000978048	0.000130039	0.00373682	0.000495975	0.00588928	0.00180919	0.000746478	0.00175713	0.000926375	0.00118236	0.00138264
GH136	0.0025641	0.000445067	0.0034775	0.000130039	0.000266916	0.000495975	0.000107078	0.00168858	0.00139965	0.00104718	0.00176452	0.00146056	0.00125484
GH173	0.000226244	0.000445067	0	0	0	0.000515051	0	0	0.000559858	0.000124241	0.000749923	0.000139101	0.000395041
CBM61	0.00100553	0.000428583	0.00391219	0	0	0.000495975	0	0.000482451	0.000419894	0.000905186	0.000264679	0.00111281	0.000580943
PL33	0.00155857	0.000412099	0.000108672	0	0.00226878	0.000476899	0.00267695	0.00180919	0.00107306	0.000745447	0.000970488	0.000417304	0.000941127
CBM5	0.000527903	0.000379131	0	0.000260078	0.000667289	0.000400595	0	0	0.000419894	0.00028398	0.000838149	6.95507e-05	0.000499611
GH94	0.000452489	0.000379131	0	0.000130039	0.000400374	0.000419671	0.000321234	0.000482451	0.000606513	0.000372724	0.000308792	0.000486855	0.000395041
GH133	0.00186023	0.000362647	0.000326016	0.000130039	0.000667289	0.000400595	0.000214156	0.00639247	0.00135299	0.000763196	0.00105871	0.00111281	0.000929508
GT10	0.000125691	0.000362647	0.000217344	0	0	0.000419671	0	0.000361838	0.000326584	0.000195236	0.000397018	0.000556406	0.000220758
GH57	0.00238813	0.000346163	0.00141274	0	0.00186841	0.000381519	0	0.00603064	0.00139965	0.00111817	0.0010146	0.00146056	0.00110379
CE0	5.02765e-05	0.000346163	0	0.000260078	0	0.000362443	0	0	0.000373239	0.00014199	0.000308792	0.000347754	0.000209139
PL36	0	0.000346163	0	0	0	0.000400595	0	0	9.33097e-05	0.000319477	4.41131e-05	0.000139101	0.000220758
GH81	0.000452489	0.000329679	0.000108672	0	0.000133458	0.000362443	0	0.000482451	0.000606513	0.000230734	0.000529357	0.000208652	0.00040666
AA10	0	0.000329679	0	0.00143043	0	0.000171684	0	0	9.33097e-05	0.000195236	0.000308792	0	0.000232377
GH55	0.000201106	0.000313195	0	0	0	0.000362443	0.000749545	0	4.66548e-05	0.000443719	4.41131e-05	0	0.000313709
GH104	0	0.000313195	0	0.00143043	0	0.000152608	0	0	0	0.00028398	0.000132339	0.000417304	0.000151045
PL35	0.00223731	0.000296711	0.000108672	0.000390117	0.00346991	0.000286139	0.00364065	0.00301532	0.000933097	0.00124241	0.000749923	0.000834608	0.00110379
CBM3	0.000980392	0.000296711	0.000217344	0	0.00160149	0.000343367	0.00107078	0.000723676	0.000653168	0.000514714	0.000617583	0.000278203	0.000615799
CBM88	0.000678733	0.000296711	0	0	0.0025357	0.000343367	0	0.000120613	0.000419894	0.000479216	0.000397018	6.95507e-05	0.00051123
GH66	0.00015083	0.000296711	0.00054336	0	0.000133458	0.000343367	0	0	0.000139965	0.000301729	0.000176452	0.000347754	0.000220758
AA3	0.00180995	0.000280227	0.000217344	0.00169051	0.00320299	7.63038e-05	0.00214156	0.00253287	0.000699823	0.00115367	0.000397018	0.00097371	0.000871414
GH120	5.02765e-05	0.000280227	0	0	0	0.000324291	0	0.000241225	0.000186619	0.000195236	0.000176452	0.000139101	0.000197521
GH159	0.000502765	0.000263744	0.00119539	0	0	0.000305215	0.000214156	0.000603064	0.000326584	0.000372724	0.000352905	0.000208652	0.000383422
AA5	0	0.000263744	0	0	0	0.000305215	0	0	0.000466548	0	0.000264679	0.000208652	0.000151045
GT25	0.000125691	0.00024726	0	0.000520156	0.000133458	0.000209836	0.000321234	0.000120613	4.66548e-05	0.000248482	0.000220566	6.95507e-05	0.000220758
PL15	0.000100553	0.00024726	0	0	0	0.000286139	0	0.000482451	0.000186619	0.000212985	0.000132339	6.95507e-05	0.000209139
GT3	0.00326797	0.000230776	0.00369485	0	0.00387028	0.000228912	0.0048185	0	0.000653168	0.0020766	0.00057347	0.00118236	0.00147559
CBM16	0.00072901	0.000230776	0.000108672	0	0	0.000267063	0	0	0.000606513	0.000230734	0.000749923	0.000139101	0.000476373
GH129	0.000125691	0.000230776	0	0	0	0.000267063	0.000107078	0.000120613	0.000419894	1.77487e-05	0.000397018	6.95507e-05	0.000209139
GH85	2.51383e-05	0.000230776	0.000108672	0.000130039	0	0.000247987	0	0	0.000279929	7.0995e-05	0.000220566	0.000139101	0.000151045
PL25	2.51383e-05	0.000230776	0	0	0	0.000267063	0	0	0.000466548	1.77487e-05	0.000176452	0	0.000174283
GH74	0.000603318	0.000214292	0.000869376	0	0.000533832	0.000247987	0.000428311	0	0.000326584	0.000496965	8.82262e-05	0.000625956	0.000325328
GH87	0.000100553	0.000214292	0	0	0.000400374	0.000247987	0	0	9.33097e-05	0.000266231	0	0.000278203	0.000151045
CBM62	0.000301659	0.000197808	0	0	0.000667289	0.000228912	0.000321234	0.000361838	0.000279929	0.000266231	0.000132339	0.000278203	0.000232377
GH12	5.02765e-05	0.000197808	0	0.000650195	0	0.000133532	0	0	9.33097e-05	0.000195236	4.41131e-05	0	0.000162664
GH84	5.02765e-05	0.000197808	0.000217344	0.000130039	0	0.000209836	0	0	9.33097e-05	0.000124241	0.000220566	6.95507e-05	0.000151045
GH119	0	0.000197808	0	0.000130039	0	0.000209836	0	0	9.33097e-05	0.000124241	0.000132339	6.95507e-05	0.000127807
GH166	0	0.000197808	0	0	0	0.000228912	0	0	9.33097e-05	8.87437e-05	0.000220566	0.000139101	0.000116189
GH59	0	0.000197808	0	0	0	0.000228912	0	0	0.000373239	3.54975e-05	8.82262e-05	6.95507e-05	0.000127807
GT89	0	0.000197808	0	0.00156047	0	0	0	0	0	0.000212985	0	6.95507e-05	0.000127807
GT8	0.000754148	0.00016484	0.00152141	0.000650195	0.00106766	9.53798e-05	0.000428311	0.000241225	4.66548e-05	0.000603457	0.000220566	0.000347754	0.00040666
GH114	5.02765e-05	0.00016484	0	0	0	0.00019076	0.000107078	0	0.000233274	7.0995e-05	0.000132339	0.000139101	0.000116189
CBM90	0	0.00016484	0	0	0	0.00019076	0	0	0.000233274	3.54975e-05	0.000132339	0	0.000116189
PL22	0.000251383	0.000148356	0.000760704	0	0.000400374	0.000171684	0	0	0.000233274	0.000195236	0.000132339	6.95507e-05	0.000209139
CBM73	0.000226244	0.000148356	0	0	0.000533832	0.000171684	0	0	0.000186619	0.000106492	0.000352905	0	0.000209139
GH108	0.000125691	0.000148356	0.000108672	0.000130039	0.000133458	0.000133532	0.000214156	0.000120613	4.66548e-05	0.000159739	0.000176452	6.95507e-05	0.000151045
GH6	0	0.000148356	0	0	0	0.000171684	0	0	0	0.000159739	0	0	0.00010457
PL0	0.000226244	0.000131872	0	0	0.000400374	0.000152608	0.000642467	0	4.66548e-05	0.000248482	8.82262e-05	0.000347754	0.000139426
PL31	0.000226244	0.000131872	0.000326016	0	0	0.000152608	0	0.000361838	0.000279929	5.32462e-05	0.000352905	6.95507e-05	0.000185902
GH11	0.000201106	0.000131872	0	0	0.000266916	0.000152608	0	0	0.000233274	5.32462e-05	0.000352905	6.95507e-05	0.000174283
PL14	7.54148e-05	0.000131872	0.000108672	0	0.000133458	0.000152608	0	0	0.000233274	3.54975e-05	0.000176452	6.95507e-05	0.000116189
GH107	0	0.000131872	0	0	0	0.000152608	0	0	0.000186619	1.77487e-05	0.000132339	0	9.29508e-05
GT101	0	0.000131872	0	0.000780234	0	3.81519e-05	0	0	4.66548e-05	0.000124241	0	6.95507e-05	8.1332e-05
GH48	0.00015083	0.000115388	0	0	0	0.000133532	0	0	0.000233274	1.77487e-05	0.000308792	0	0.000151045
GT22	5.02765e-05	0.000115388	0	0	0.000266916	3.81519e-05	0	0	4.66548e-05	0.000124241	4.41131e-05	0	0.00010457
GH165	0.000452489	9.89038e-05	0	0	0.000133458	0.000114456	0.000963701	0.000964902	0.000373239	0.000177487	0.000264679	0.000139101	0.000255615
GH151	0.000125691	9.89038e-05	0	0	0.000266916	0.000114456	0	0	4.66548e-05	7.0995e-05	0.000264679	0	0.000127807
GT111	0.000100553	9.89038e-05	0	0	0	0.000114456	0.000107078	0	4.66548e-05	0.000106492	0.000132339	0.000208652	8.1332e-05
PL26	0.000527903	8.24198e-05	0.000434688	0	0.000133458	9.53798e-05	0.000856623	0.000844289	9.33097e-05	0.000301729	0.000308792	0.000417304	0.000232377
CE3	0.000502765	8.24198e-05	0.00163008	0	0	7.63038e-05	0.000107078	0.000482451	0.000326584	0.000248482	0.000176452	0.000556406	0.000197521
GT84	0.000251383	8.24198e-05	0	0.000130039	0.000266916	7.63038e-05	0.000107078	0.000482451	4.66548e-05	0.000195236	0.000132339	0.000417304	0.00010457
GT81	0.000125691	8.24198e-05	0	0	0	9.53798e-05	0.000535389	0	0.000186619	7.0995e-05	8.82262e-05	0	0.000116189
GH49	7.54148e-05	8.24198e-05	0	0	0.000133458	9.53798e-05	0	0	0	0.000106492	8.82262e-05	0	9.29508e-05
CBM85	5.02765e-05	8.24198e-05	0	0	0.000133458	9.53798e-05	0.000107078	0	0	0.000124241	0	0.000417304	1.16189e-05
PL21	5.02765e-05	8.24198e-05	0	0	0.000133458	9.53798e-05	0.000107078	0	4.66548e-05	5.32462e-05	0.000132339	6.95507e-05	6.97131e-05
PL4	0	8.24198e-05	0	0	0	9.53798e-05	0	0	9.33097e-05	3.54975e-05	4.41131e-05	0	5.80943e-05
GH44	0.00042735	6.59359e-05	0	0	0.000400374	7.63038e-05	0.00117786	0	0.000139965	0.000319477	0	6.95507e-05	0.000232377
CBM60	0.000276521	6.59359e-05	0.000217344	0	0.000133458	7.63038e-05	0	0	0.000186619	8.87437e-05	0.000264679	6.95507e-05	0.000162664
GH164	5.02765e-05	6.59359e-05	0	0	0	7.63038e-05	0	0	4.66548e-05	7.0995e-05	4.41131e-05	0	6.97131e-05
GT100	0	6.59359e-05	0	0.000130039	0	5.72279e-05	0	0	0	1.77487e-05	0.000132339	0	4.64754e-05
CBM66	5.02765e-05	4.94519e-05	0	0	0.000133458	5.72279e-05	0	0	0	8.87437e-05	0	0.000139101	3.48566e-05
AA2	0	4.94519e-05	0	0	0	3.81519e-05	0	0	4.66548e-05	3.54975e-05	0	0	3.48566e-05
CBM42	0	4.94519e-05	0	0	0	5.72279e-05	0	0	9.33097e-05	1.77487e-05	0	6.95507e-05	2.32377e-05
GH157	0	4.94519e-05	0	0	0	5.72279e-05	0	0	9.33097e-05	0	4.41131e-05	0	3.48566e-05
GH96	0	4.94519e-05	0	0	0	5.72279e-05	0	0	9.33097e-05	0	4.41131e-05	0	3.48566e-05
GT74	0	4.94519e-05	0	0.000130039	0	3.81519e-05	0	0	0	5.32462e-05	0	0	3.48566e-05
GH47	0.000175968	3.29679e-05	0	0	0	3.81519e-05	0	0	0.000186619	1.77487e-05	0.000176452	0	0.00010457
GH34	7.54148e-05	3.29679e-05	0	0	0	3.81519e-05	0	0	0	3.54975e-05	0.000132339	0	5.80943e-05
CBM84	2.51383e-05	3.29679e-05	0	0	0.000133458	3.81519e-05	0	0	9.33097e-05	1.77487e-05	0	0	3.48566e-05
GT17	2.51383e-05	3.29679e-05	0	0	0	3.81519e-05	0	0	4.66548e-05	1.77487e-05	4.41131e-05	0	3.48566e-05
CBM63	0	3.29679e-05	0	0	0	3.81519e-05	0	0	4.66548e-05	0	4.41131e-05	0	2.32377e-05
GH111	0	3.29679e-05	0	0	0	3.81519e-05	0	0	4.66548e-05	0	4.41131e-05	0	2.32377e-05
GH4	0	3.29679e-05	0	0	0	3.81519e-05	0	0	4.66548e-05	0	4.41131e-05	6.95507e-05	1.16189e-05
GH98	0	3.29679e-05	0	0	0	3.81519e-05	0	0	0	3.54975e-05	0	0	2.32377e-05
GT6	0	3.29679e-05	0	0	0	3.81519e-05	0	0	0	3.54975e-05	0	0	2.32377e-05
GT105	0.00057818	1.6484e-05	0	0	0.00213533	0	0.000749545	0	0.000186619	0.000354975	0	0.000139101	0.000255615
GH79	0.000326797	1.6484e-05	0.000326016	0	0.000400374	1.9076e-05	0.000428311	0.000361838	0.000139965	0.000177487	4.41131e-05	0.000208652	0.000127807
AA7	0.00015083	1.6484e-05	0.000108672	0	0.000266916	1.9076e-05	0.000321234	0	0	0.000124241	0	0.000139101	5.80943e-05
CBM10	2.51383e-05	1.6484e-05	0	0	0.000133458	1.9076e-05	0	0	0	3.54975e-05	0	0	2.32377e-05
PL30	2.51383e-05	1.6484e-05	0	0	0	1.9076e-05	0.000107078	0	0	3.54975e-05	0	0	2.32377e-05
CBM0	0	1.6484e-05	0	0.000130039	0	0	0	0	0	1.77487e-05	0	0	1.16189e-05
CBM12	0	1.6484e-05	0	0.000130039	0	0	0	0	0	1.77487e-05	0	0	1.16189e-05
GH101	0	1.6484e-05	0	0	0	1.9076e-05	0	0	0	1.77487e-05	0	0	1.16189e-05
GH135	0	1.6484e-05	0	0	0	1.9076e-05	0	0	0	1.77487e-05	0	0	1.16189e-05
GH46	0	1.6484e-05	0	0.000130039	0	0	0	0	0	1.77487e-05	0	0	1.16189e-05
GH54	0	1.6484e-05	0	0	0	1.9076e-05	0	0	0	1.77487e-05	0	6.95507e-05	0
GH62	0	1.6484e-05	0	0	0	1.9076e-05	0	0	0	1.77487e-05	0	0	1.16189e-05
GT56	0	1.6484e-05	0	0	0	1.9076e-05	0	0	0	1.77487e-05	0	0	1.16189e-05
GT70	0	1.6484e-05	0	0	0	1.9076e-05	0	0	0	0	4.41131e-05	0	1.16189e-05
PL13	0	1.6484e-05	0	0	0	1.9076e-05	0	0	0	1.77487e-05	0	6.95507e-05	0
PL27	0	1.6484e-05	0	0	0	1.9076e-05	0	0	0	1.77487e-05	0	0	1.16189e-05
PL34	0	1.6484e-05	0	0	0	1.9076e-05	0	0	0	0	4.41131e-05	0	1.16189e-05
CBM8	0.000377074	0	0	0	0.000400374	0	0.00128493	0	9.33097e-05	0.000230734	0	0	0.000174283
GH93	0.000251383	0	0.000217344	0	0.000934205	0	0	0	4.66548e-05	0.00014199	4.41131e-05	6.95507e-05	0.00010457
GH148	0.000226244	0	0	0	0	0	0.000321234	0.000603064	0.000139965	8.87437e-05	4.41131e-05	0.000139101	8.1332e-05
GH14	0.000175968	0	0	0	0	0	0	0	9.33097e-05	1.77487e-05	0.000176452	0	8.1332e-05
GH156	0.000175968	0	0	0	0.000400374	0	0.000428311	0	4.66548e-05	0.000106492	0	0.000139101	5.80943e-05
GT61	0.000175968	0	0.000217344	0	0	0	0	0.000603064	0.000186619	5.32462e-05	0	0.000139101	5.80943e-05
GT23	0.00015083	0	0	0	0	0	0.000107078	0.000361838	9.33097e-05	0	0.000176452	6.95507e-05	5.80943e-05
CBM36	0.000100553	0	0	0	0	0	0	0	4.66548e-05	0	0.000132339	0	4.64754e-05
CBM56	0.000100553	0	0	0	0.000133458	0	0	0	0	5.32462e-05	4.41131e-05	0	4.64754e-05
GT60	0.000100553	0	0	0	0.000266916	0	0.000214156	0	4.66548e-05	1.77487e-05	8.82262e-05	0.000208652	1.16189e-05
GT94	0.000100553	0	0.000434688	0	0	0	0	0	0	7.0995e-05	0	6.95507e-05	3.48566e-05
CBM23	7.54148e-05	0	0	0	0	0	0	0	4.66548e-05	1.77487e-05	4.41131e-05	0	3.48566e-05
CBM64	7.54148e-05	0	0	0	0	0	0	0	0.000139965	0	0	0	3.48566e-05
GH103	7.54148e-05	0	0	0	0	0	0	0	9.33097e-05	0	4.41131e-05	0	3.48566e-05
GH68	7.54148e-05	0	0	0	0	0	0	0.000361838	0	3.54975e-05	4.41131e-05	6.95507e-05	2.32377e-05
GT41	7.54148e-05	0	0	0	0.000266916	0	0	0	4.66548e-05	3.54975e-05	0	0	3.48566e-05
AA12	5.02765e-05	0	0	0	0	0	0.000107078	0	0	3.54975e-05	0	0	2.32377e-05
CBM2	5.02765e-05	0	0	0	0.000133458	0	0	0	4.66548e-05	1.77487e-05	0	0	2.32377e-05
PL2	5.02765e-05	0	0	0	0	0	0	0.000241225	4.66548e-05	1.77487e-05	0	0.000139101	0
CBM31	2.51383e-05	0	0	0	0	0	0	0	0	0	4.41131e-05	0	1.16189e-05
GH160	2.51383e-05	0	0	0	0	0	0.000107078	0	0	1.77487e-05	0	0	1.16189e-05
GH71	2.51383e-05	0	0.000108672	0	0	0	0	0	0	1.77487e-05	0	0	1.16189e-05
GT47	2.51383e-05	0	0.000108672	0	0	0	0	0	0	1.77487e-05	0	6.95507e-05	0
GT55	2.51383e-05	0	0	0	0	0	0	0	4.66548e-05	0	0	0	1.16189e-05

## Sheet: Supplementary Table 4b
Supplementary Table 4b: Absolute abundance of CAZyme families across different orders, families, sources, and environment conditions.
CAZyme Family	Cytophagales	Flavobacteriales	Hymenobacteraceae	Weeksellaceae	Cytophagaceae	Flavobacteriaceae	Spirosomaceae	Cyclobacteriaceae	tidal_flat	land	marine	extreme	normal
GT2	5004	9537	1146	1532	1058	7850	1301	1026	3088	8216	3237	2211	12330
GT4	3498	6489	888	1074	614	5311	743	905	2163	5666	2158	1606	8381
GH13	1743	2459	504	416	348	2028	441	212	812	2515	875	703	3499
GH3	889	2221	268	309	132	1894	107	172	688	1679	743	477	2633
GH2	932	1733	221	85	133	1643	162	165	635	1322	708	276	2389
GH43	1693	1623	548	171	278	1452	324	395	571	2167	578	541	2775
CBM50	675	1501	189	144	110	1345	122	206	463	1236	477	345	1831
GT51	771	1400	258	154	156	1223	164	91	429	1257	485	326	1845
GH16	549	1149	90	47	62	1096	90	151	511	671	516	227	1471
GH92	509	1087	116	155	91	924	122	69	288	901	407	176	1420
GH29	613	974	42	88	103	884	177	160	418	649	520	122	1465
GT0	346	904	90	97	88	800	96	32	251	726	273	180	1070
GH23	696	898	121	54	153	819	118	215	406	794	394	253	1341
GT9	430	804	139	61	125	725	111	1	229	760	245	193	1041
GT5	190	803	40	142	31	651	35	53	225	500	268	149	844
GH20	646	791	132	64	131	722	152	169	292	765	380	178	1259
GH97	344	775	113	115	63	660	48	53	174	752	193	171	948
GH5	541	711	116	54	112	656	101	82	279	697	276	175	1077
GH30	282	647	73	115	48	531	71	42	155	602	172	123	806
CBM6	761	641	108	77	177	563	183	117	291	786	325	184	1218
GH31	293	639	76	29	30	607	46	82	218	461	253	149	783
CBM48	668	624	191	119	121	501	181	104	243	818	231	226	1066
GH28	362	560	107	62	64	498	86	73	174	593	155	115	807
GH130	257	549	35	58	66	490	82	36	147	509	150	138	668
CE4	212	538	47	79	34	451	54	42	143	445	162	106	644
GH73	32	535	0	88	1	436	0	1	134	280	153	70	497
GH171	300	529	74	76	55	443	61	70	189	434	206	121	708
CBM32	450	501	49	68	99	433	130	115	179	555	217	96	855
CE11	200	500	49	77	31	413	38	53	156	373	171	105	595
GT19	195	500	47	77	30	413	38	53	156	370	169	104	591
GT28	205	497	49	76	33	411	39	53	158	375	169	105	597
CE14	259	492	55	53	40	428	62	75	171	394	186	118	633
CE20	398	469	101	28	67	441	95	81	164	518	185	127	740
GH0	497	468	75	108	100	360	152	136	211	544	210	155	810
GH78	363	451	26	0	88	451	114	92	226	353	235	70	744
GT30	166	450	37	74	27	367	26	48	135	330	151	93	523
PL1	241	420	79	65	20	355	22	89	109	419	133	93	568
GH65	136	409	36	12	39	395	40	4	122	276	147	105	440
GH105	338	408	92	46	89	362	68	54	140	466	140	94	652
GH95	388	360	58	25	70	335	135	86	124	452	172	85	663
GH144	209	358	33	79	28	279	57	62	112	301	154	83	484
GH117	135	338	7	15	9	323	22	57	181	79	213	26	447
GH18	224	332	22	93	52	238	60	49	91	382	83	62	494
PL7	39	313	1	7	0	305	2	0	153	57	142	24	328
GH10	353	301	80	20	75	280	66	92	141	399	114	121	533
GH17	36	291	0	3	0	287	0	33	127	107	93	75	252
GH32	194	285	33	10	41	275	51	57	103	268	108	78	401
GH109	224	277	19	38	39	239	79	65	124	251	126	59	442
GT83	231	277	46	13	64	261	47	54	146	216	146	65	443
CE12	253	273	98	61	32	212	39	61	94	340	92	75	451
CE8	202	271	96	52	21	219	26	36	82	328	63	70	403
GH88	228	261	32	8	53	253	63	55	107	269	113	49	440
GH113	94	259	25	1	11	256	13	36	122	90	141	55	298
GH33	425	256	26	5	55	251	145	186	159	336	186	76	605
GH26	221	249	57	5	41	243	58	16	85	286	99	77	393
PL6	38	237	3	3	3	233	6	4	115	57	103	20	255
GH106	265	235	30	20	75	214	91	55	124	271	105	42	458
GH25	146	228	63	76	19	150	34	19	40	305	29	67	307
GT1	291	219	48	92	53	122	80	73	101	334	75	70	440
GH51	196	216	73	16	21	200	33	27	62	270	80	70	342
CBM67	212	214	17	0	50	214	78	35	110	193	123	35	391
CE1	489	203	55	23	141	178	157	101	128	463	101	91	601
CBM9	73	179	10	0	26	179	17	7	62	111	79	21	231
GH27	65	174	34	19	14	155	6	2	39	162	38	30	209
CBM57	271	166	65	2	8	163	131	47	95	241	101	89	348
GH15	163	163	68	0	17	162	13	39	92	125	109	59	267
GH37	138	162	44	38	30	124	42	12	47	202	51	60	240
GT20	172	160	49	0	33	159	26	40	88	141	103	57	275
GH115	111	155	46	24	18	131	14	21	54	169	43	42	224
GH127	180	155	31	0	27	155	72	22	70	196	69	30	305
CBM13	162	154	76	22	40	132	21	13	46	236	34	54	262
GH146	106	148	33	16	16	132	22	28	33	159	62	36	218
GH1	283	142	138	18	72	123	61	5	50	334	41	77	348
PL10	58	131	26	21	4	110	10	15	31	125	33	21	168
GT35	156	130	52	64	20	65	33	33	49	193	44	45	241
GH53	66	121	29	5	7	115	4	5	36	118	33	29	158
GH19	35	118	8	62	3	56	15	1	9	125	19	18	135
GH125	94	114	27	38	15	76	35	6	24	158	26	29	179
PL17	25	112	2	2	1	109	3	4	63	23	51	12	125
GH63	23	111	14	4	0	107	2	0	46	37	51	16	118
CBM47	220	110	6	0	46	110	63	93	91	147	92	48	282
GH35	83	110	40	19	13	91	13	3	21	150	22	16	177
GH39	132	108	15	3	41	105	53	11	42	157	41	30	210
GT26	119	107	33	1	25	105	17	32	54	105	67	39	187
GH141	91	106	5	6	18	100	40	21	38	100	59	16	181
GH67	154	105	46	19	24	86	32	42	49	174	36	45	214
GT32	13	105	2	63	2	42	4	5	11	87	20	14	104
GH149	16	104	0	1	0	102	0	15	48	42	30	25	95
PL40	22	103	1	0	0	103	5	4	53	16	56	6	119
CE6	135	99	18	16	36	82	33	39	44	139	51	29	205
GH9	303	95	57	0	76	95	78	46	81	257	60	58	340
GH110	45	92	0	0	1	92	14	8	52	48	37	13	124
CE2	66	91	32	2	7	89	2	0	30	101	26	28	129
PL12	78	91	3	4	9	87	41	17	48	77	44	16	153
PL29	7	88	0	0	1	88	0	1	38	35	22	7	88
CBM35	150	85	57	1	21	84	23	9	51	130	54	28	207
GH36	91	85	15	5	30	80	33	1	30	113	33	20	156
CBM4	40	82	4	0	8	82	8	14	27	59	36	22	100
PL8	68	75	4	14	12	61	17	31	35	67	41	13	130
GH154	90	74	25	4	21	70	20	18	37	96	31	14	150
GH99	9	74	1	19	2	55	0	0	9	61	13	8	75
GH77	118	73	49	65	31	8	24	0	14	161	16	31	160
GT14	31	70	11	45	2	24	12	4	12	83	6	12	89
PL9	15	69	3	2	2	67	2	1	24	42	18	10	74
PL11	65	66	28	17	9	49	9	17	20	96	15	23	108
CBM20	69	65	30	65	5	0	15	0	8	112	14	18	116
CBM77	4	62	3	10	0	52	0	0	8	51	7	8	58
GT11	57	62	2	3	28	58	20	6	14	91	14	24	95
GH140	211	61	26	1	41	60	79	51	50	176	46	31	241
GH163	15	60	1	3	3	56	3	8	13	37	25	15	60
CBM91	72	59	32	18	2	41	7	21	23	86	22	28	103
CE9	170	58	20	0	44	58	70	31	31	162	35	31	197
GH8	61	58	24	0	22	58	5	0	14	90	15	22	97
CBM51	211	57	23	10	51	47	75	45	51	164	53	32	236
GH128	22	57	3	0	1	57	0	11	18	47	14	19	60
GH86	67	56	0	0	0	56	3	2	50	5	68	1	122
GH89	15	55	2	8	2	47	9	0	11	41	18	5	65
GH172	43	52	14	0	10	52	3	9	16	41	38	13	82
GH38	26	52	0	2	6	50	5	2	26	22	30	1	77
GH139	39	51	6	0	6	51	18	8	11	59	20	6	84
GH42	28	50	9	0	4	50	4	0	6	63	9	7	71
CE19	96	47	9	0	21	47	38	26	25	95	23	16	127
PL38	87	47	21	0	26	47	16	18	42	64	28	7	127
GH167	11	46	0	0	0	46	1	0	30	7	20	3	54
GH82	20	43	1	0	0	43	0	1	22	10	31	6	57
GH158	97	42	46	0	12	41	15	17	32	81	26	27	112
CBM26	24	41	0	2	2	39	0	0	18	22	25	4	61
GH24	7	41	0	21	0	20	1	5	7	35	6	9	39
PL24	4	41	0	0	0	41	0	0	20	5	20	2	43
PL42	44	41	17	0	0	41	6	15	22	39	24	10	75
GH116	37	40	1	0	9	40	11	5	13	37	27	3	74
GH168	3	40	0	0	0	40	0	0	15	4	24	0	43
CE15	261	39	36	0	58	39	80	76	68	185	47	43	257
GH50	23	38	4	1	2	37	2	1	16	33	12	7	54
PL28	1	38	0	0	0	38	0	0	24	3	12	0	39
PL37	5	38	0	0	0	38	1	2	25	2	16	0	43
GH76	61	36	13	0	11	36	14	20	17	62	18	16	81
GH123	13	34	5	3	1	31	5	0	6	29	12	4	43
GH137	44	34	5	0	7	34	16	14	11	53	14	6	72
GH143	55	34	6	0	8	34	28	12	7	69	13	8	81
GH150	12	34	0	0	0	34	0	0	28	5	13	3	43
GH142	42	33	6	0	8	33	20	7	4	61	10	6	69
GH147	56	33	35	0	3	33	6	5	16	54	19	25	64
GH138	27	32	5	0	6	32	10	5	3	48	8	6	53
GH64	16	32	6	0	3	32	0	0	7	28	13	10	38
CE7	94	30	10	0	24	30	34	19	22	77	25	14	110
GT113	0	29	0	0	0	29	0	0	8	2	19	2	27
CBM38	109	27	9	1	28	26	55	15	16	99	21	17	119
GH136	102	27	32	1	2	26	1	14	30	59	40	21	108
GH173	9	27	0	0	0	27	0	0	12	7	17	2	34
CBM61	40	26	36	0	0	26	0	4	9	51	6	16	50
PL33	62	25	1	0	17	25	25	15	23	42	22	6	81
CBM5	21	23	0	2	5	21	0	0	9	16	19	1	43
GH94	18	23	0	1	3	22	3	4	13	21	7	7	34
GH133	74	22	3	1	5	21	2	53	29	43	24	16	80
GT10	5	22	2	0	0	22	0	3	7	11	9	8	19
CE0	2	21	0	2	0	19	0	0	8	8	7	5	18
GH57	95	21	13	0	14	20	0	50	30	63	23	21	95
PL36	0	21	0	0	0	21	0	0	2	18	1	2	19
AA10	0	20	0	11	0	9	0	0	2	11	7	0	20
GH81	18	20	1	0	1	19	0	4	13	13	12	3	35
GH104	0	19	0	11	0	8	0	0	0	16	3	6	13
GH55	8	19	0	0	0	19	7	0	1	25	1	0	27
CBM3	39	18	2	0	12	18	10	6	14	29	14	4	53
CBM88	27	18	0	0	19	18	0	1	9	27	9	1	44
GH66	6	18	5	0	1	18	0	0	3	17	4	5	19
PL35	89	18	1	3	26	15	34	25	20	70	17	12	95
AA3	72	17	2	13	24	4	20	21	15	65	9	14	75
GH120	2	17	0	0	0	17	0	2	4	11	4	2	17
AA5	0	16	0	0	0	16	0	0	10	0	6	3	13
GH159	20	16	11	0	0	16	2	5	7	21	8	3	33
GT25	5	15	0	4	1	11	3	1	1	14	5	1	19
PL15	4	15	0	0	0	15	0	4	4	12	3	1	18
CBM16	29	14	1	0	0	14	0	0	13	13	17	2	41
GH129	5	14	0	0	0	14	1	1	9	1	9	1	18
GH85	1	14	1	1	0	13	0	0	6	4	5	2	13
GT3	130	14	34	0	29	12	45	0	14	117	13	17	127
PL25	1	14	0	0	0	14	0	0	10	1	4	0	15
GH74	24	13	8	0	4	13	4	0	7	28	2	9	28
GH87	4	13	0	0	3	13	0	0	2	15	0	4	13
CBM62	12	12	0	0	5	12	3	3	6	15	3	4	20
GH119	0	12	0	1	0	11	0	0	2	7	3	1	11
GH12	2	12	0	5	0	7	0	0	2	11	1	0	14
GH166	0	12	0	0	0	12	0	0	2	5	5	2	10
GH59	0	12	0	0	0	12	0	0	8	2	2	1	11
GH84	2	12	2	1	0	11	0	0	2	7	5	1	13
GT89	0	12	0	12	0	0	0	0	0	12	0	1	11
CBM90	0	10	0	0	0	10	0	0	5	2	3	0	10
GH114	2	10	0	0	0	10	1	0	5	4	3	2	10
GT8	30	10	14	5	8	5	4	2	1	34	5	5	35
CBM73	9	9	0	0	4	9	0	0	4	6	8	0	18
GH108	5	9	1	1	1	7	2	1	1	9	4	1	13
GH6	0	9	0	0	0	9	0	0	0	9	0	0	9
PL22	10	9	7	0	3	9	0	0	5	11	3	1	18
GH107	0	8	0	0	0	8	0	0	4	1	3	0	8
GH11	8	8	0	0	2	8	0	0	5	3	8	1	15
GT101	0	8	0	6	0	2	0	0	1	7	0	1	7
PL0	9	8	0	0	3	8	6	0	1	14	2	5	12
PL14	3	8	1	0	1	8	0	0	5	2	4	1	10
PL31	9	8	3	0	0	8	0	3	6	3	8	1	16
GH48	6	7	0	0	0	7	0	0	5	1	7	0	13
GT22	2	7	0	0	2	2	0	0	1	7	1	0	9
GH151	5	6	0	0	2	6	0	0	1	4	6	0	11
GH165	18	6	0	0	1	6	9	8	8	10	6	2	22
GT111	4	6	0	0	0	6	1	0	1	6	3	3	7
CBM85	2	5	0	0	1	5	1	0	0	7	0	6	1
CE3	20	5	15	0	0	4	1	4	7	14	4	8	17
GH49	3	5	0	0	1	5	0	0	0	6	2	0	8
GT81	5	5	0	0	0	5	5	0	4	4	2	0	10
GT84	10	5	0	1	2	4	1	4	1	11	3	6	9
PL21	2	5	0	0	1	5	1	0	1	3	3	1	6
PL26	21	5	4	0	1	5	8	7	2	17	7	6	20
PL4	0	5	0	0	0	5	0	0	2	2	1	0	5
CBM60	11	4	2	0	1	4	0	0	4	5	6	1	14
GH164	2	4	0	0	0	4	0	0	1	4	1	0	6
GH44	17	4	0	0	3	4	11	0	3	18	0	1	20
GT100	0	4	0	1	0	3	0	0	0	1	3	0	4
AA2	0	3	0	0	0	2	0	0	1	2	0	0	3
CBM42	0	3	0	0	0	3	0	0	2	1	0	1	2
CBM66	2	3	0	0	1	3	0	0	0	5	0	2	3
GH157	0	3	0	0	0	3	0	0	2	0	1	0	3
GH96	0	3	0	0	0	3	0	0	2	0	1	0	3
GT74	0	3	0	1	0	2	0	0	0	3	0	0	3
CBM63	0	2	0	0	0	2	0	0	1	0	1	0	2
CBM84	1	2	0	0	1	2	0	0	2	1	0	0	3
GH111	0	2	0	0	0	2	0	0	1	0	1	0	2
GH34	3	2	0	0	0	2	0	0	0	2	3	0	5
GH4	0	2	0	0	0	2	0	0	1	0	1	1	1
GH47	7	2	0	0	0	2	0	0	4	1	4	0	9
GH98	0	2	0	0	0	2	0	0	0	2	0	0	2
GT17	1	2	0	0	0	2	0	0	1	1	1	0	3
GT6	0	2	0	0	0	2	0	0	0	2	0	0	2
AA7	6	1	1	0	2	1	3	0	0	7	0	2	5
CBM0	0	1	0	1	0	0	0	0	0	1	0	0	1
CBM10	1	1	0	0	1	1	0	0	0	2	0	0	2
CBM12	0	1	0	1	0	0	0	0	0	1	0	0	1
GH101	0	1	0	0	0	1	0	0	0	1	0	0	1
GH135	0	1	0	0	0	1	0	0	0	1	0	0	1
GH46	0	1	0	1	0	0	0	0	0	1	0	0	1
GH54	0	1	0	0	0	1	0	0	0	1	0	1	0
GH62	0	1	0	0	0	1	0	0	0	1	0	0	1
GH79	13	1	3	0	3	1	4	3	3	10	1	3	11
GT105	23	1	0	0	16	0	7	0	4	20	0	2	22
GT56	0	1	0	0	0	1	0	0	0	1	0	0	1
GT70	0	1	0	0	0	1	0	0	0	0	1	0	1
PL13	0	1	0	0	0	1	0	0	0	1	0	1	0
PL27	0	1	0	0	0	1	0	0	0	1	0	0	1
PL30	1	1	0	0	0	1	1	0	0	2	0	0	2
PL34	0	1	0	0	0	1	0	0	0	0	1	0	1
AA12	2	0	0	0	0	0	1	0	0	2	0	0	2
CBM2	2	0	0	0	1	0	0	0	1	1	0	0	2
CBM23	3	0	0	0	0	0	0	0	1	1	1	0	3
CBM31	1	0	0	0	0	0	0	0	0	0	1	0	1
CBM36	4	0	0	0	0	0	0	0	1	0	3	0	4
CBM56	4	0	0	0	1	0	0	0	0	3	1	0	4
CBM64	3	0	0	0	0	0	0	0	3	0	0	0	3
CBM8	15	0	0	0	3	0	12	0	2	13	0	0	15
GH103	3	0	0	0	0	0	0	0	2	0	1	0	3
GH14	7	0	0	0	0	0	0	0	2	1	4	0	7
GH148	9	0	0	0	0	0	3	5	3	5	1	2	7
GH156	7	0	0	0	3	0	4	0	1	6	0	2	5
GH160	1	0	0	0	0	0	1	0	0	1	0	0	1
GH68	3	0	0	0	0	0	0	3	0	2	1	1	2
GH71	1	0	1	0	0	0	0	0	0	1	0	0	1
GH93	10	0	2	0	7	0	0	0	1	8	1	1	9
GT23	6	0	0	0	0	0	1	3	2	0	4	1	5
GT41	3	0	0	0	2	0	0	0	1	2	0	0	3
GT47	1	0	1	0	0	0	0	0	0	1	0	1	0
GT55	1	0	0	0	0	0	0	0	1	0	0	0	1
GT60	4	0	0	0	2	0	2	0	1	1	2	3	1
GT61	7	0	2	0	0	0	0	5	4	3	0	2	5
GT94	4	0	4	0	0	0	0	0	0	4	0	1	3
PL2	2	0	0	0	0	0	0	2	1	1	0	2	0
